# Supplementary material for: Dual Regulatory Mechanisms of Expression and Mutation Involving Metabolism-Related Genes FDFT1 and UQCR5 during CLM
Source: PubMed Central journal article supplement — Mol Ther Oncolytics. 2019 May 22;14:172–8. doi: 10.1016/j.omto.2019.04.008 (PMC6579909; doi:10.1016/j.omto.2019.04.008), 2019-05-22
Supplement: mmc1.pdf [file mmc1.pdf]

**OMTO, Volume 14**

**Supplemental Information**

**Dual Regulatory Mechanisms of Expression  
and Mutation Involving Metabolism-Related Genes**

**FDFT1 and UQCR5 during CLM**

**Yu-Shui Ma, Zhi-Jun Wu, Hong-Wei Zhang, Bo Cai, Tao Huang, Hui-Deng Long, Hong Xu, Yong-Zhong Zhao, Yu-Zhen Yin, Shao-Bo Xue, Liu Li, Cheng-Lin Liu, Ru-Ting Xie, Lin-Lin Tian, Ji-Bin Liu, Xu-Ming Wu, and Da Fu**

## Supplementary Figures and Legends

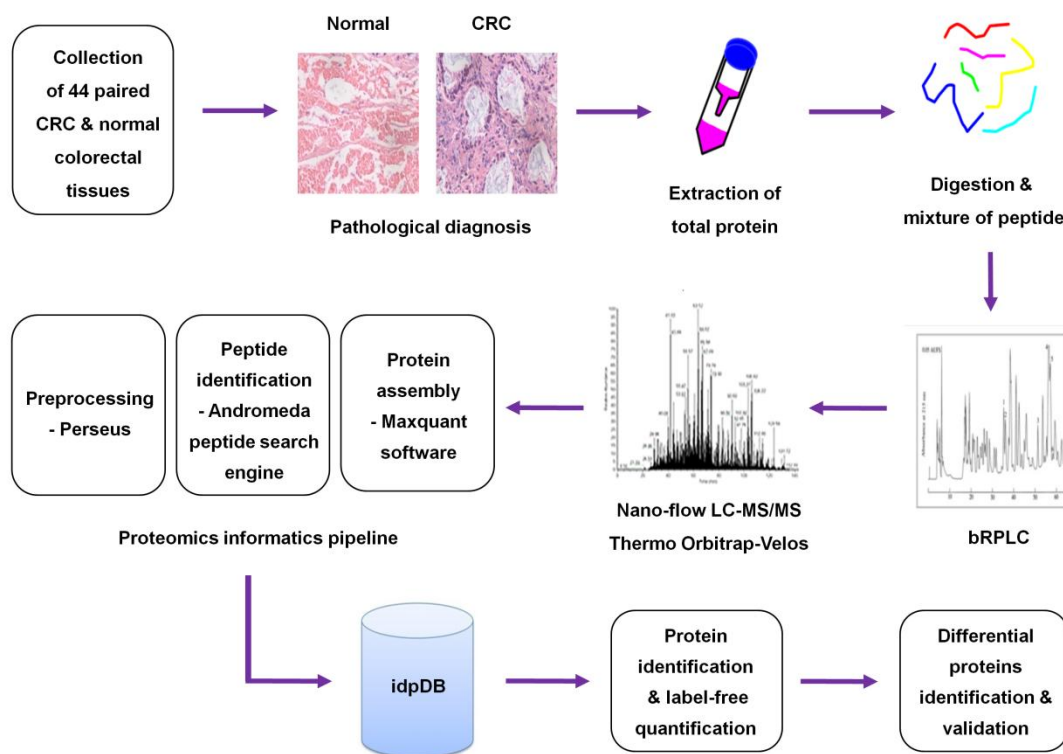

**Figure S1. Mass-spectrometry-based proteomics workflow.** Protein was extracted from 44 CRC and paired PN tissues and was used to generate tryptic digests. The resulting tryptic peptides were fractionated using off-line bRPLC. Collected fractions were pooled and used with a Thermo Orbitrap-Velos MS instrument. Raw data were processed by Perseus software and then used for database and spectral library evaluation using the Andromeda peptide search engine. Identified peptides were assembled using Maxquant software. bRPLC, basic reverse-phase (high-pressure) liquid chromatography; CRC, colorectal cancer; PN paracarcinoma normal tissue.

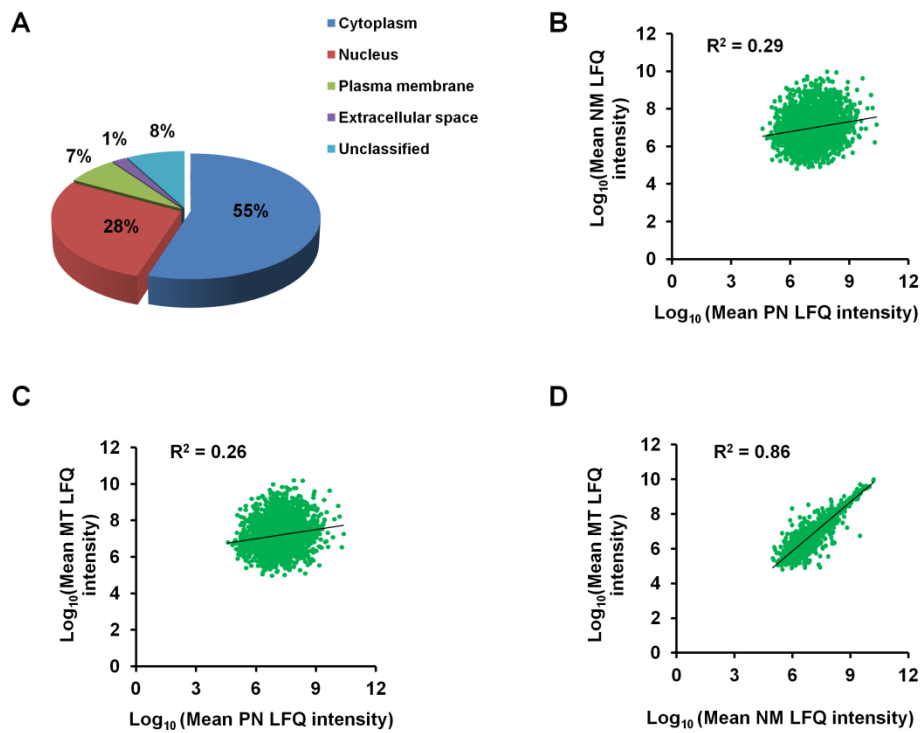

**Figure S2. Peptide and protein identification of 44 paired CRC samples.** A, The cellular distribution is shown for 5758 proteins identified from 44 CRC patients by mass spectrometry, with a false discovery rate of 1.0 %. Correlation analysis of protein expression between 21 NM and paired PN samples (B), 23 MT and paired PN samples (C), or 23 MT and 21 NM samples (D).

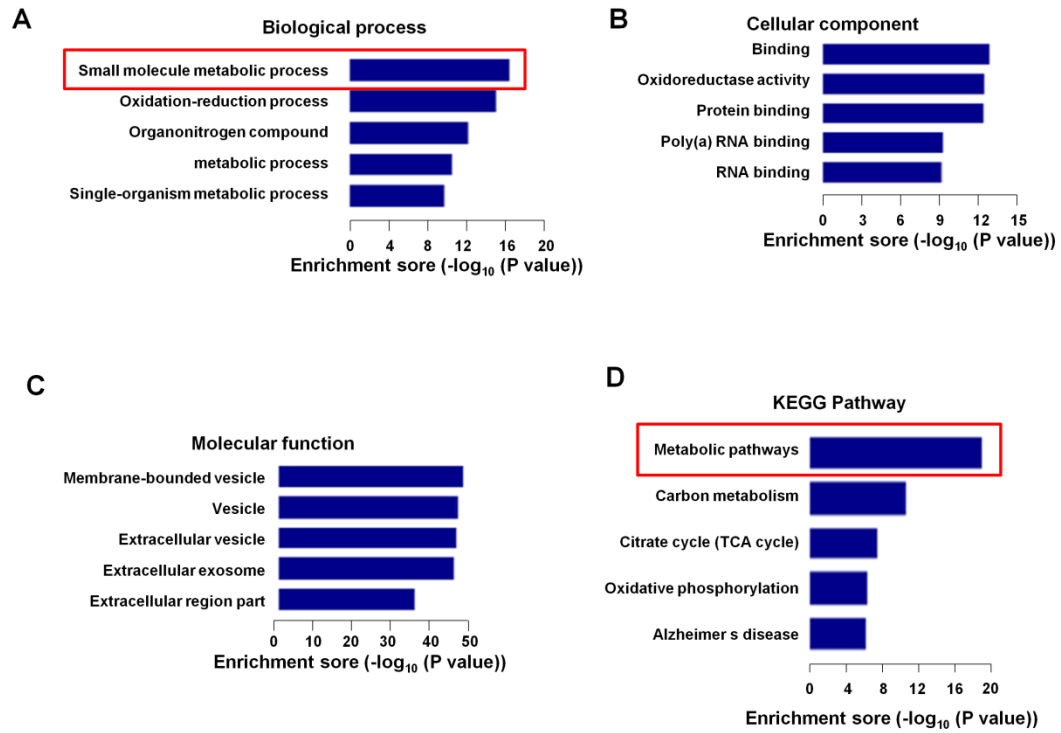

**Figure S3. GO and KEGG pathway analysis of differentially expressed protein.**

Gene Ontology using STRING online analysis software classified the 2170 differentially expressed proteins in CLM according to their biological process (A), cellular component (B) and molecular function (C). D, KEGG pathway analysis of the 2170 differentially expressed proteins.

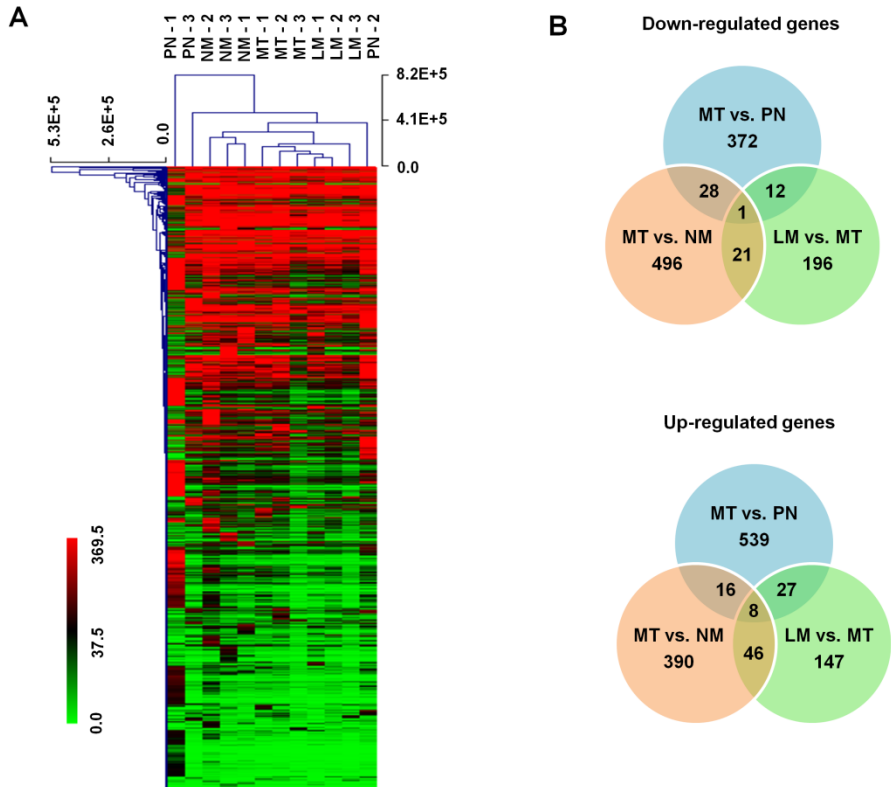

**Figure S4. RNA sequencing and identification of differentially expressed mRNAs. A,** Hierarchical clustering for RNA-sequencing data of 12 samples. **B,** Significantly changed genes among three groups from RNA-sequencing data of 12 samples.

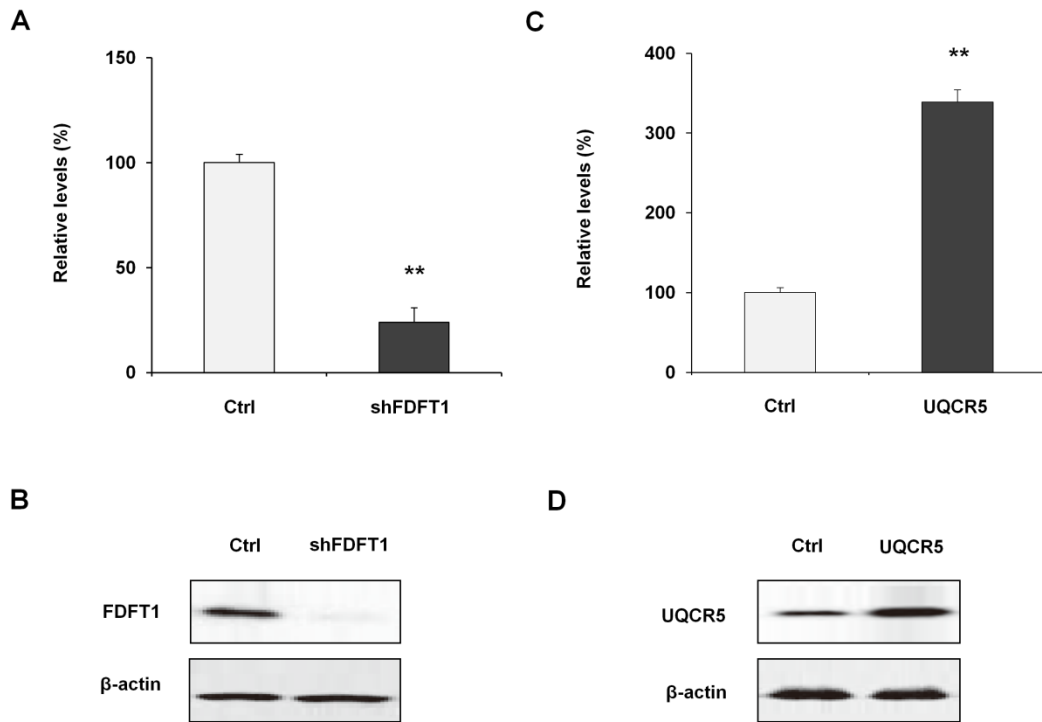

**Figure S5. qRT-PCR and Western blot to quantify FDFT1 and UQCR5 levels in SW480 cells.** A, qRT-PCR measurement of the levels of FDFT1 mRNA in SW480 cells treated with negative control or shFDFT1. A, Western blot measurement of the levels of FDFT1 protein in SW480 cells treated with negative control or shFDFT1. C, qRT-PCR measurement of the levels of UQCR5 mRNA in SW480 cells treated with negative control or UQCR5 overexpression plasmid. D, Western blot measurement of the levels of UQCR5 protein in SW480 cells treated with negative control or UQCR5 overexpression plasmid. Data shown are the means  $\pm$  SD of three independent experiments. Statistical analyses were performed with one-way ANOVA (\*\* =  $P < 0.01$ ).

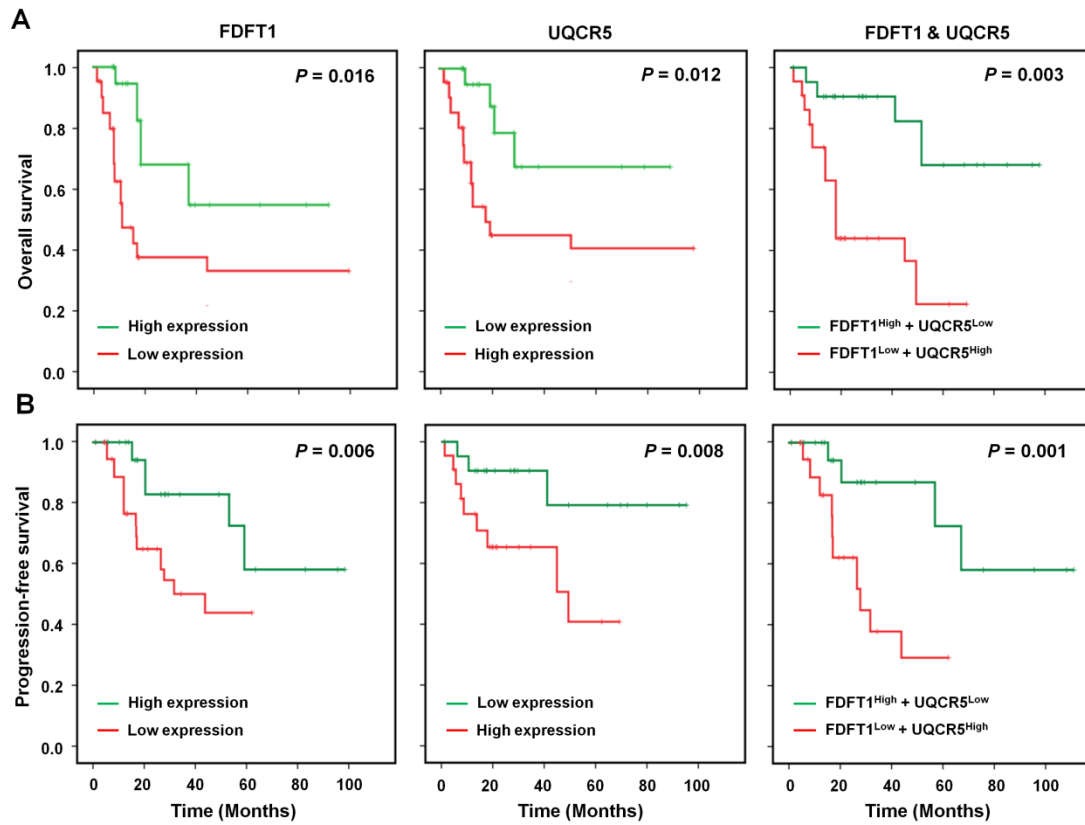

**Figure S6. Clinical significance of FDFT1 and UQCR5 in 44 CRC.** Kaplan-Meier survival analysis to evaluate the prognostic value of FDFT1 or/and UQCR5 expression for OS (A) and PFS (B) of 44 CRC patients.

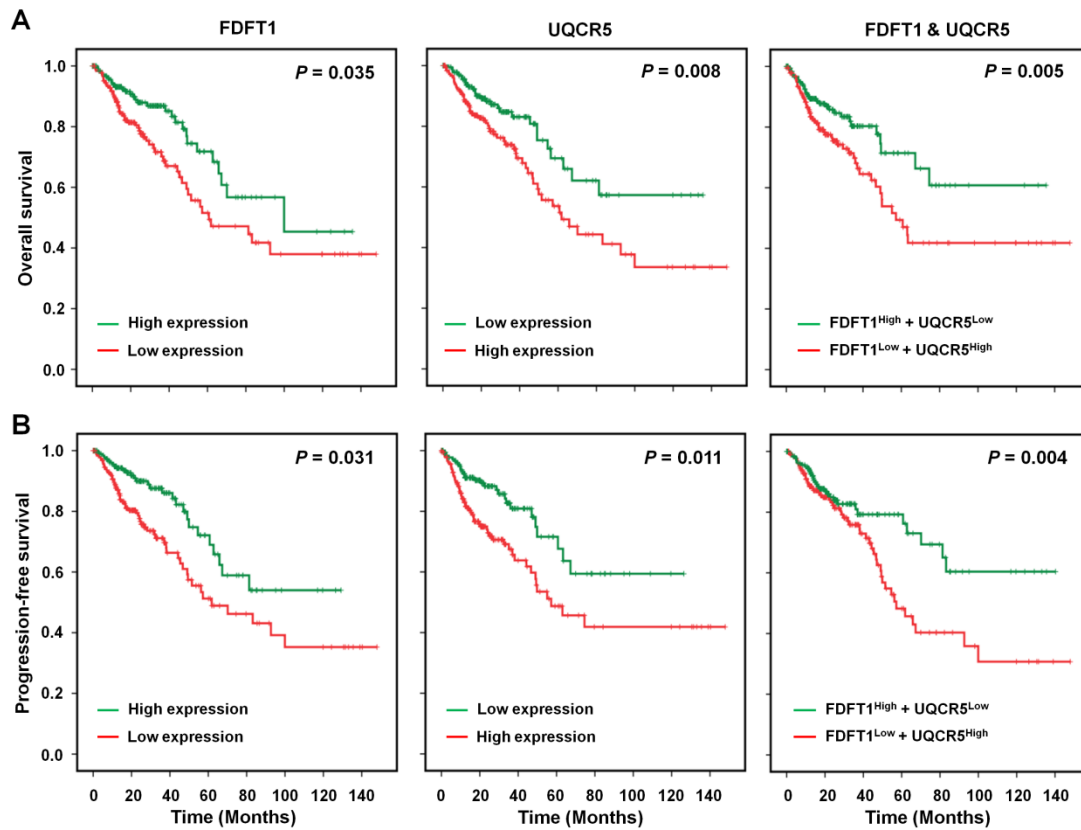

**Figure S7. Clinical significance of FDFT1 and UQCR5 in 379 CRC patients from TCGA portal.** Kaplan-Meier survival analysis was used to evaluate the prognostic value of FDFT1 and/or UQCR5 expression in 379 CRC patients from TCGA portal for OS (A) and PFS (B).



**Table S1. Summary of CRC patients demographic and clinical characteristics.**

| Factor                 | Variables  | Non-metastatic (N = 21) | Metastatic to liver (N = 23) |
|------------------------|------------|-------------------------|------------------------------|
|                        |            | Number (%)              | Number (%)                   |
| Age                    | ≥ 60       | 14 (66.7%)              | 11 (47.8%)                   |
|                        | < 60       | 7 (33.3%)               | 12 (52.2%)                   |
| Gender                 | Male       | 11 (52.4%)              | 10 (43.5%)                   |
|                        | Female     | 10 (47.6%)              | 13 (56.5%)                   |
| Primary site           | Colon      | 9 (42.9%)               | 14 (60.9%)                   |
|                        | Rectum     | 12 (57.1%)              | 9 (39.1%)                    |
| Differentiation        | Well       | 0 (0.0%)                | 0 (0.0%)                     |
|                        | Moderately | 16 (76.2%)              | 16 (69.6%)                   |
|                        | Poorly     | 5 (23.8%)               | 7 (30.4%)                    |
| Completeness           | R0         | 21 (100.0%)             | 23 (100.0%)                  |
|                        | R1         | 0 (0.0%)                | 0 (0.0%)                     |
| Diameter               | ≥ 5 cm     | 10 (47.6%)              | 10 (43.5%)                   |
|                        | < 5 cm     | 11 (52.4%)              | 13 (56.5%)                   |
| Number of primary foci | Multiple   | 8 (38.1%)               | 9 (39.1%)                    |
|                        | Single     | 13 (61.9%)              | 14 (60.9%)                   |
| TNM stage              | I          | 10 (47.6%)              | 2 (8.7%)                     |
|                        | II         | 6 (28.6%)               | 3(13.0%)                     |
|                        | III        | 5 (23.8%)               | 12 (52.2%)                   |
|                        | IV         | 0 (0.0%)                | 6 (26.1%)                    |

|          |     |            |            |
|----------|-----|------------|------------|
| Necrosis | Yes | 11 (52.4%) | 10 (43.5%) |
|          | No  | 10 (47.6%) | 13 (56.5%) |

**Table S2. Prognosis analysis based on clinical characteristics of 374 CRC patients.**

| Factor                   | Variable | N   | Overall survival |               |         | Progression free survival |               |         | Hazard Ratio |                     |         |
|--------------------------|----------|-----|------------------|---------------|---------|---------------------------|---------------|---------|--------------|---------------------|---------|
|                          |          |     | Months (Mean)    | 95% CI (Mean) | P value | Months (Mean)             | 95% CI (Mean) | P value | Hazard Ratio | 95% CI (univariate) | P value |
| Age                      | ≥ 60     | 245 | 30.89            | 26.32 - 34.21 | 0.825   | 30.26                     | 26.89 - 34.54 | 0.779   | 1.21         | 1.03 - 1.61         | 0.438   |
|                          | < 60     | 129 | 31.52            | 26.12 - 34.93 |         | 31.02                     | 26.55 - 34.83 |         |              |                     |         |
| Gender                   | Male     | 206 | 31.11            | 27.27 - 33.94 | 0.147   | 30.12                     | 26.33 - 35.04 | 0.196   | 1.11         | 0.93 - 1.22         | 0.798   |
|                          | Female   | 168 | 31.87            | 26.01 - 35.74 |         | 31.29                     | 25.76 - 34.83 |         |              |                     |         |
| Lymph node metastasis    | Positive | 169 | 27.34            | 25.43 - 29.58 | <0.001  | 28.02                     | 26.04 - 30.96 | <0.001  | 2.31         | 1.49 - 3.61         | 0.021   |
|                          | Negative | 205 | 31.28            | 29.72 - 33.87 |         | 31.33                     | 29.26 - 33.41 |         |              |                     |         |
| TNM stage                | III-IV   | 307 | 26.69            | 24.36 - 29.83 | 0.012   | 26.04                     | 24.33 - 29.98 | <0.001  | 2.52         | 1.94 - 4.21         | <0.001  |
|                          | I-II     | 67  | 31.58            | 26.19 - 33.48 |         | 31.96                     | 26.87 - 34.56 |         |              |                     |         |
| Lympho-vascular invasion | Positive | 101 | 29.67            | 27.89 - 32.26 | 0.058   | 30.09                     | 26.89 - 32.76 | 0.066   | 1.89         | 0.93 - 2.52         | 0.068   |
|                          | Negative | 228 | 31.03            | 26.74 - 34.52 |         | 31.53                     | 26.24 - 33.75 |         |              |                     |         |
|                          | Unknown  | 45  | 29.31            | 27.65 - 35.43 |         | 29.31                     | 27.65 - 35.43 |         |              |                     |         |
| Vascular invasion        | Positive | 76  | 28.39            | 26.45 - 30.33 | 0.045   | 27.95                     | 24.36 - 30.85 | 0.038   | 2.59         | 1.69 - 3.97         | <0.001  |
|                          | Negative | 247 | 31.04            | 28.71 - 34.31 |         | 30.83                     | 26.77 - 33.61 |         |              |                     |         |
|                          | Unknown  | 51  | 29.33            | 27.58 - 33.46 |         | 29.34                     | 26.62 - 33.41 |         |              |                     |         |
| Diameter                 | ≥ 2 cm   | 168 | 26.86            | 24.39 - 29.01 | < 0.001 | 26.56                     | 24.21 - 30.04 | < 0.001 | 2.69         | 1.88 - 4.05         | <0.001  |
|                          | < 2 cm   | 206 | 29.86            | 27.39 - 33.01 |         | 29.35                     | 27.86 - 33.21 |         |              |                     |         |

**Table S3. Association between deregulated genes expression and clinicopathological characteristics in 374 CRC patients.**

| Factor                | Variable | N   | BGN       |       | EHD2      |       | UQCR5     |       | COL1A2     |       | FDFT1     |       |
|-----------------------|----------|-----|-----------|-------|-----------|-------|-----------|-------|------------|-------|-----------|-------|
|                       |          |     | Exp.      | P val | Exp.      | P val | Exp.      | P val | Exp.       | P val | Exp.      | P val |
| Age                   | ≥ 60     | 245 | 7382.77 ± | 0.059 | 988.15 ±  | 0.096 | 2306.19 ± | 0.355 | 44266.64 ± | 0.143 | 4859.76 ± | 0.691 |
|                       |          |     | 57.51     |       | 106.822   |       | 77.25     |       | 4471.07    |       | 278.89    |       |
|                       | < 60     | 129 | 5913.18 ± |       | 1158.61 ± |       | 2218.22 ± |       | 36716.91 ± |       | 4973.92 ± |       |
|                       |          |     | 83.25     |       | 89.22     |       | 105.94    |       | 5477.49    |       | 273.91    |       |
| Gender                | Male     | 206 | 6482.14 ± | 0.593 | 996.25 ±  | 0.087 | 2312.88 ± | 0.229 | 40475.24 ± | 0.967 | 4820.44 ± | 0.449 |
|                       |          |     | 685.82    |       | 94.87     |       | 98.64     |       | 4459.14    |       | 283.99    |       |
|                       | Female   | 168 | 6886.32 ± |       | 1171.99 ± |       | 2197.98 ± |       | 40691.79 ± |       | 5037.77 ± |       |
|                       |          |     | 776.09    |       | 104       |       | 82.15     |       | 5589.24    |       | 266.55    |       |
| Lymph node metastasis | Positive | 169 | 8056.72 ± | 0.005 | 1242.81 ± | 0.009 | 2396.53 ± | 0.005 | 47442.41 ± | 0.042 | 4249.89 ± | 0.001 |
|                       |          |     | 672.64    |       | 96.23     |       | 98.44     |       | 4783.17    |       | 272.39    |       |
|                       | Negative | 205 | 5769.78 ± |       | 953.42 ±  |       | 2100.17 ± |       | 36080.96 ± |       | 5241.01 ± |       |
|                       |          |     | 804.92    |       | 106.12    |       | 84.66     |       | 5487.47    |       | 246.66    |       |
| TNM stage             | III-IV   | 307 | 7180.22 ± | 0.002 | 1138.28 ± | 0.008 | 2380.39 ± | 0.033 | 43495.06 ± | 0.014 | 4748.09 ± | 0.012 |
|                       |          |     | 700.48    |       | 104.19    |       | 81.34     |       | 5095.37    |       | 283.47    |       |
|                       | I-II     | 67  | 4116.95 ± |       | 784.39 ±  |       | 2141.84 ± |       | 26943.58 ± |       | 5682.63 ± |       |
|                       |          |     | 754.57    |       | 91.94     |       | 99.18     |       | 4842.12    |       | 267.95    |       |
| Lympho-               | Positive | 101 | 9164.55 ± | 0.001 | 1387.15 ± | 0.001 | 2319.57 ± | 0.018 | 53918.21 ± | 0.008 | 4117.85 ± | 0.001 |

|                   |          |           |           |           |           |           |           |            |            |           |           |       |
|-------------------|----------|-----------|-----------|-----------|-----------|-----------|-----------|------------|------------|-----------|-----------|-------|
| vascular invasion |          |           | 752.61    |           | 92.55     |           | 82.19     |            | 4884.51    |           | 284.67    |       |
|                   | Negative | 228       | 5989.06 ± |           | 979.59 ±  |           | 2070.79 ± |            | 37457.02 ± |           | 5236.09 ± |       |
|                   |          |           | 744.28    |           | 112.35    |           | 103.63    |            | 5547.11    |           | 254.64    |       |
|                   | Unknown  | 46        | 7718.94 ± |           | 1218.94 ± |           | 2217.64 ± |            | 39918.94 ± |           | 4418.94 ± |       |
| 955.53            |          |           |           | 95.53     |           | 95.88     |           | 9855.53    |            | 335.53    |           |       |
| Vascular invasion | Positive | 76        | 8075.33 ± | 0.048     | 1305.52 ± | 0.037     | 2295.64 ± | 0.039      | 49634.54 ± | 0.034     | 4264.56 ± | 0.031 |
|                   |          |           | 685.82    |           | 94.87     |           | 82.15     |            | 4459.14    |           | 283.99    |       |
|                   | Negative | 247       | 6411.98 ± |           | 1026.79 ± |           | 2001.96 ± |            | 40229.51 ± |           | 5022.76 ± |       |
|                   |          |           | 776.09    |           | 104.01    |           | 98.64     |            | 5589.24    |           | 266.55    |       |
| Unknown           | 57       | 6920.36 ± |           | 1120.36 ± |           | 2112.36 ± |           | 45520.36 ± |            | 5020.36 ± |           |       |
|                   |          | 855.45    |           | 95.45     |           | 95.46     |           | 5455.45    |            | 265.45    |           |       |
| Diameter          | ≥ 2 cm   | 168       | 8716.08 ± | 0.001     | 1406.11 ± | 0.001     | 2394.95 ± | 0.022      | 50931.51 ± | 0.017     | 2802.45 ± | 0.023 |
|                   |          |           | 558.84    |           | 71.39     |           | 83.58     |            | 3572.48    |           | 312.14    |       |
|                   | < 2 cm   | 206       | 5776.66 ± |           | 970.41 ±  |           | 2010.82 ± |            | 37502.59 ± |           | 5200.36 ± |       |
|                   |          |           | 859.58    |           | 117.26    |           | 214.38    |            | 5960.01    |           | 251.85    |       |

**Supplementary Table 4. SAAVs in NM-specific sample.**

| <b>Protein Variants</b> | <b>Accession number</b> | <b>Protein_Change</b> | <b>Exon</b> | <b>RefSeq</b> | <b>Chrs</b> | <b>Position</b> | <b>cDNA_Change</b> | <b>SIFT Score</b> | <b>PolyPhenV2</b> |
|-------------------------|-------------------------|-----------------------|-------------|---------------|-------------|-----------------|--------------------|-------------------|-------------------|
| ABCA4                   | P78363                  | p.W1479X              | exon30      | NM_000350     | 1           | 94495103        | c.4437G>A          | 0                 | 0.735             |
| ACTR10                  | Q9NZ32                  | p.I258V               | exon10      | NM_018477     | 14          | 58690558        | c.772A>G           | 1                 | 0                 |
| ACTRT1                  | Q8TDG2                  | p.L70M                | exon1       | NM_138289     | X           | 127185978       | c.208T>A           | 0.01              | 0.004             |
| ETNPPL                  | Q8TBG4                  | p.G118V               | exon5       | NM_001146627  | 4           | 109674142       | c.353G>T           | 0                 | 0.997             |
| AKAP1                   | Q92667                  | p.S651N               | exon4       | NM_003488     | 17          | 55189262        | c.1952G>A          | 0.95              | 0                 |
| ALDH18A1                | P54886                  | p.Q4X                 | exon2       | NM_001017423  | 10          | 97413125        | c.10C>T            | 0.13              | 0.728             |
| ANKRD11                 | Q6UB99                  | p.S56C                | exon4       | NM_013275     | 16          | 89371674        | c.166A>T           | 0                 | 0.053             |
| ANO1                    | Q5XXA6                  | p.G154R               | exon3       | NM_018043     | 11          | 69949190        | c.460G>A           | 0.37              |                   |
| ARHGAP20                | Q9P2F6                  | p.A995V               | exon16      | NM_020809     | 11          | 110450686       | c.2984C>T          | 0.26              | 0.001             |
| ARHGAP36                | Q6ZRI8                  | p.T126P               | exon4       | NM_144967     | X           | 130217764       | c.376A>C           | 0.02              | 0.899             |
| ARMC9                   | Q7Z3E5                  | p.R405C               | exon14      | NM_025139     | 2           | 232137670       | c.1213C>T          | 0                 | 1                 |
| BAI1                    | O14514                  | p.A214T               | exon1       | NM_001702     | 8           | 143546199       | c.640G>A           | 1                 |                   |
| BMP10                   | O95393                  | p.E420K               | exon2       | NM_014482     | 2           | 69092780        | c.1258G>A          | 0.07              | 0.206             |
| C16orf70                | Q9BSU1                  | p.G113A               | exon5       | NM_025187     | 16          | 67166411        | c.338G>C           | 0                 | 0.998             |
| CCDC189                 | A1A4V9                  | p.C145F               | exon4       | NM_001014979  | 16          | 30771640        | c.434G>T           | 0.98              | 0.999             |
| TMEM249                 | Q2WVGJ8                 | p.R206H               | exon5       | NM_001252402  | 8           | 145577099       | c.617G>A           | 0                 |                   |
| CABIN1                  | Q9Y6J0                  | p.G75S                | exon5       | NM_001199281  | 22          | 24437599        | c.223G>A           | 0.25              | 0.405             |
| CACNA1H                 | O95180                  | p.T1615P              | exon27      | NM_021098     | 16          | 1263845         | c.4843A>C          | 0                 |                   |
| CCDC120                 | Q96HB5                  | p.A559G               | exon10      | NM_001163323  | X           | 48925467        | c.1676C>G          | 0.41              | 0                 |
| CCDC39                  | Q9UFE4                  | p.E81K                | exon3       | NM_181426     | 3           | 180379765       | c.241G>A           | 0                 |                   |
| CCDC39                  | Q9UFE4                  | p.Q660H               | exon14      | NM_181426     | 3           | 180349275       | c.1980G>T          | 0                 |                   |
| CCNK                    | O75909                  | p.H406P               | exon11      | NM_001099402  | 14          | 99976593        | c.1217A>C          | 0.09              |                   |
| CD109                   | Q6YHK3                  | p.K556X               | exon14      | NM_133493     | 6           | 74477946        | c.1666A>T          | 0.13              | 0.693             |
| CD3G                    | P09693                  | p.L110R               | exon4       | NM_000073     | 11          | 118221288       | c.329T>G           | 0                 | 0.992             |
| CETP                    | P11597                  | p.D487N               | exon16      | NM_000078     | 16          | 57017555        | c.1459G>A          | 0.18              | 0.726             |
| CHST6                   | Q9GZX3                  | p.R155Q               | exon3       | NM_021615     | 16          | 75513263        | c.464G>A           | 0.83              | 0.027             |

|         |        |          |        |              |    |           |            |      |       |
|---------|--------|----------|--------|--------------|----|-----------|------------|------|-------|
| CLSPN   | Q9HAW4 | p.D64E   | exon3  | NM_001190481 | 1  | 36230257  | c.192C>A   | 0    | 0.187 |
| CNOT4   | O95628 | p.R46H   | exon2  | NM_001190850 | 7  | 135122943 | c.137G>A   | 0    | 0.999 |
| COL12A1 | Q99715 | p.P1565H | exon26 | NM_004370    | 6  | 75853101  | c.4694C>A  |      | 0.998 |
| COL8A1  | P27658 | p.G659S  | exon4  | NM_020351    | 3  | 99514720  | c.1975G>A  | 0    | 0.999 |
| CPN2    | P22792 | p.D415Y  | exon2  | NM_001080513 | 3  | 194062189 | c.1243G>T  | 0.01 | 0.989 |
| CPZ     | Q66K79 | p.R219H  | exon3  | NM_003652    | 4  | 8605895   | c.656G>A   | 0.09 | 0.951 |
| CREBBP  | Q92793 | p.D1665N | exon30 | NM_004380    | 16 | 3781372   | c.4993G>A  | 0.01 | 0.783 |
| CST7    | O76096 | p.C110Y  | exon3  | NM_003650    | 20 | 24939649  | c.329G>A   | 0    | 0.727 |
| CUX2    | O14529 | p.A863T  | exon17 | NM_015267    | 12 | 111758400 | c.2587G>A  | 0.2  | 0     |
| DDX31   | Q9H8H2 | p.S303I  | exon7  | NM_022779    | 9  | 135527875 | c.908G>T   | 0.02 | 0.89  |
| DGKB    | Q9Y6T7 | p.S172P  | exon6  | NM_145695    | 7  | 14741308  | c.514T>C   | 0.01 |       |
| EFNB1   | P98172 | p.R154C  | exon3  | NM_004429    | X  | 68059560  | c.460C>T   | 0.05 | 0.717 |
| EML5    | Q05BV3 | p.D1295N | exon27 | NM_183387    | 14 | 89123841  | c.3883G>A  | 0    |       |
| ERI2    | A8K979 | p.P623L  | exon9  | NM_001142725 | 16 | 20809254  | c.1868C>T  | 0    |       |
| FAM69C  | Q0P6D2 | p.R111W  | exon2  | NM_001044369 | 18 | 72114386  | c.331C>T   | 0.05 |       |
| FANCG   | O15287 | p.S383F  | exon10 | NM_004629    | 9  | 35075747  | c.1148C>T  | 0.03 | 0     |
| FYCO1   | Q9BQS8 | p.G973S  | exon8  | NM_024513    | 3  | 46007909  | c.2917G>A  | 0.75 | 0     |
| GCM2    | O75603 | p.R143W  | exon3  | NM_004752    | 6  | 10876707  | c.427C>T   | 0    | 1     |
| GLI2    | P10070 | p.P906L  | exon13 | NM_005270    | 2  | 121746207 | c.2717C>T  | 0    | 0.998 |
| GZMA    | P12544 | p.I191V  | exon4  | NM_006144    | 5  | 54404166  | c.571A>G   | 0    | 0.149 |
| HIF3A   | Q9Y2N7 | p.E582K  | exon13 | NM_152795    | 19 | 46834444  | c.1744G>A  | 0.28 | 0     |
| HMCN1   | Q96RW7 | p.R3793H | exon74 | NM_031935    | 1  | 186084052 | c.11378G>A | 0.01 | 0.999 |
| HUWE1   | Q7Z6Z7 | p.A2634V | exon57 | NM_031407    | X  | 53586329  | c.7901C>T  | 0.07 | 0.125 |
| IGSF3   | O75054 | p.V489M  | exon7  | NM_001542    | 1  | 117146465 | c.1465G>A  | 0.01 | 0.003 |
| IKZF4   | Q9H2S9 | p.R489L  | exon8  | NM_022465    | 12 | 56428823  | c.1466G>T  | 0.01 |       |
| KAT6A   | Q92794 | p.Q1335X | exon18 | NM_001099413 | 8  | 41791735  | c.4003C>T  | 0.48 | 0.735 |
| KCNF1   | Q9H3M0 | p.R299C  | exon1  | NM_002236    | 2  | 11053447  | c.895C>T   | 0    | 1     |
| LY86    | O95711 | p.G37S   | exon1  | NM_004271    | 6  | 6589076   | c.109G>A   | 0.34 | 0.081 |
| MAGEC1  | O60732 | p.W717L  | exon4  | NM_005462    | X  | 140995340 | c.2150G>T  | 0    | 0.489 |
| MGA     | Q8IWI9 | p.T2716M | exon24 | NM_001164273 | 15 | 42058427  | c.8147C>T  | 0    |       |

|         |        |          |        |              |    |           |           |      |       |
|---------|--------|----------|--------|--------------|----|-----------|-----------|------|-------|
| MUC12   | Q9UKN1 | p.D868N  | exon2  | NM_001164462 | 7  | 100636446 | c.2602G>A |      |       |
| MUC12   | Q9UKN1 | p.D868G  | exon2  | NM_001164462 | 7  | 100636447 | c.2603A>G |      |       |
| NDST1   | P52848 | p.L182F  | exon3  | NM_001543    | 5  | 149907396 | c.544C>T  | 0.03 | 0.02  |
| NID1    | P14543 | p.D171Y  | exon2  | NM_002508    | 1  | 236212004 | c.511G>T  | 0.04 | 0.001 |
| NPDC1   | Q9NQX5 | p.A232V  | exon6  | NM_015392    | 9  | 139934979 | c.695C>T  | 0.51 | 0.253 |
| NRK     | Q7Z2Y5 | p.Q554K  | exon13 | NM_198465    | X  | 105153293 | c.1660C>A | 0.03 |       |
| NRK     | Q7Z2Y5 | p.N1282S | exon23 | NM_198465    | X  | 105183911 | c.3845A>G | 0.08 |       |
| NWD1    | Q149M9 | p.V1279I | exon18 | NM_001007525 | 19 | 16918495  | c.3835G>A | 0.87 | 0.085 |
| OR1N2   | Q8NGR9 | p.M175I  | exon1  | NM_001004457 | 9  | 125315973 | c.525G>A  | 0.49 | 0.291 |
| PABPC1  | P11940 | p.L126V  | exon2  | NM_002568    | 8  | 101730326 | c.376C>G  | 0    | 0.51  |
| PABPC1  | P11940 | p.G123C  | exon2  | NM_002568    | 8  | 101730335 | c.367G>T  | 0    | 0.998 |
| PABPC1  | P11940 | p.R419C  | exon9  | NM_002568    | 8  | 101721442 | c.1255C>T | 0.01 | 0     |
| PABPC1  | P11940 | p.T416S  | exon9  | NM_002568    | 8  | 101721451 | c.1246A>T | 0.46 | 0     |
| PAPLN   | O95428 | p.C626Y  | exon15 | NM_173462    | 14 | 73726226  | c.1877G>A | 0    | 0.999 |
| PHF20   | Q9BVI0 | p.R882C  | exon16 | NM_016436    | 20 | 34526962  | c.2644C>T | 0.01 | 0.992 |
| PQLC1   | Q8N2U9 | p.T112I  | exon3  | NM_001146345 | 18 | 77703331  | c.335C>T  | 0.11 | 0     |
| PRSS3   | P35030 | p.F150S  | exon3  | NM_002771    | 9  | 33798075  | c.449T>C  | 0.45 | 0     |
| PRSS3   | P35030 | p.W222R  | exon5  | NM_002771    | 9  | 33799098  | c.664T>C  | 0.22 | 0     |
| PRSS3   | P35030 | p.W222X  | exon5  | NM_002771    | 9  | 33799099  | c.665G>A  | 0.19 | 0.589 |
| PTPN21  | Q16825 | p.Y569H  | exon13 | NM_007039    | 14 | 88946070  | c.1705T>C | 0    | 0.997 |
| NECTIN4 | Q96NY8 | p.I398V  | exon7  | NM_030916    | 1  | 161043551 | c.1192A>G | 0.13 | 0.74  |
| PXDNL   | A1KZ92 | p.D828H  | exon17 | NM_144651    | 8  | 52321702  | c.2482G>C | 0    |       |
| QKI     | Q96PU8 | p.T317M  | exon7  | NM_206853    | 6  | 163986993 | c.950C>T  | 0.01 | 0.535 |
| RFC4    | P35249 | p.K63Q   | exon3  | NM_002916    | 3  | 186518929 | c.187A>C  | 0.1  | 0.001 |
| RILPL1  | Q5EBL4 | p.R293W  | exon5  | NM_178314    | 12 | 123970277 | c.877C>T  | 0    |       |
| RIMS1   | Q86UR5 | p.E23K   | exon1  | NM_001168407 | 6  | 72922892  | c.67G>A   |      |       |
| RPA4    | Q13156 | p.S22G   | exon1  | NM_013347    | X  | 96139373  | c.64A>G   | 0.17 | 0.042 |
| SAFB2   | Q14151 | p.T950P  | exon21 | NM_014649    | 19 | 5587268   | c.2848A>C | 0    | 0.557 |
| SBF1    | O95248 | p.A5P    | exon1  | NM_002972    | 22 | 50913257  | c.13G>C   | 0    | 0.957 |
| SDR9C7  | Q8NEX9 | p.R276H  | exon4  | NM_148897    | 12 | 57317732  | c.827G>A  | 0.02 | 0.716 |



|          |        |         |        |              |    |           |           |      |       |
|----------|--------|---------|--------|--------------|----|-----------|-----------|------|-------|
| SELPLG   | Q14242 | p.A131V | exon2  | NM_003006    | 12 | 109017692 | c.392C>T  | 0.29 |       |
| SELPLG   | Q14242 | p.A131T | exon2  | NM_003006    | 12 | 109017693 | c.391G>A  | 0.3  |       |
| SLC11A1  | P49279 | p.S511N | exon14 | NM_000578    | 2  | 219259498 | c.1532G>A | 0.18 | 0     |
| SLC2A8   | Q9NY64 | p.A81T  | exon3  | NM_014580    | 9  | 130160205 | c.241G>A  | 0.07 | 0.988 |
| SLC30A3  | Q99726 | p.P216L | exon5  | NM_003459    | 2  | 27480152  | c.647C>T  | 0.15 | 0.049 |
| SLC8A3   | P57103 | p.R488H | exon2  | NM_033262    | 14 | 70633677  | c.1463G>A | 0    | 0.925 |
| SPAG8    | Q99932 | p.G472R | exon7  | NM_001039592 | 9  | 35809979  | c.1414G>A | 0    | 0.394 |
| SPATC1   | Q76KD6 | p.A146V | exon2  | NM_001134374 | 8  | 145095035 | c.437C>T  | 0.02 | 0.205 |
| SVIL     | O95425 | p.G532D | exon13 | NM_003174    | 10 | 29812670  | c.1595G>A | 0.22 | 0.001 |
| TBR1     | Q16650 | p.A547S | exon6  | NM_006593    | 2  | 162280328 | c.1639G>T | 1    | 0.002 |
| TLL2     | Q9Y6L7 | p.A302S | exon7  | NM_012465    | 10 | 98180732  | c.904G>T  | 0.04 | 0.892 |
| TMEM114  | B3SHH9 | p.S97L  | exon2  | NM_001146336 | 16 | 8619856   | c.290C>T  |      |       |
| TMEM132C | Q8N3T6 | p.A821T | exon9  | NM_001136103 | 12 | 129189974 | c.2461G>A | 0.45 |       |
| TP53     | P04637 | p.V172D | exon5  | NM_001126114 | 17 | 7578415   | c.515T>A  | 0    | 0.998 |
| UNC13C   | Q8NB66 | p.R182X | exon1  | NM_001080534 | 15 | 54305644  | c.544C>T  | 1    |       |
| USP6     | P35125 | p.I67M  | exon5  | NM_004505    | 17 | 5036210   | c.201T>G  | 0.22 | 0.369 |
| VEGF     | P15692 | p.F183L | exon1  | NM_001025369 | 6  | 43738992  | c.549T>G  | 0.02 | 0.991 |
| VGF      | O15240 | p.A325G | exon2  | NM_003378    | 7  | 100807151 | c.974C>G  | 0    | 0.512 |
| ZNF331   | Q9NQX6 | p.D10N  | exon4  | NM_001253801 | 19 | 54074876  | c.28G>A   | 0    | 0.547 |
| ZNF438   | Q7Z4V0 | p.Q594X | exon7  | NM_001143771 | 10 | 31137524  | c.1780C>T | 0.07 | 0.735 |
| ZNF717   | Q9BY31 | p.Y758F | exon5  | NM_001128223 | 3  | 75786501  | c.2273A>T | 0.4  |       |
| ZNF717   | Q9BY31 | p.H386Q | exon5  | NM_001128223 | 3  | 75787616  | c.1158C>G | 1    |       |
| ZXDA     | P98168 | p.S136T | exon1  | NM_007156    | X  | 57936449  | c.406T>A  | 0.6  | 0     |
| ZXDA     | P98168 | p.C135S | exon1  | NM_007156    | X  | 57936451  | c.404G>C  | 0.1  | 0.251 |

**Supplementary Table 5. SAAVs in NM & MT-share sample.**

| <b>Protein Variants</b> | <b>Accession number</b> | <b>Protein_Change</b> | <b>Exon</b> | <b>RefSeq</b> | <b>Chrs</b> | <b>Position</b> | <b>cDNA_Change</b> | <b>SIFT Score</b> | <b>PolyPhenV2</b> |
|-------------------------|-------------------------|-----------------------|-------------|---------------|-------------|-----------------|--------------------|-------------------|-------------------|
| A1BG                    | P04217                  | p.T278P               | exon5       | NM_130786     | 19          | 58862835        | c.832A>C           | 0                 | 0.735             |
| ADGRG6                  | Q86SQ4                  | p.W789C               | exon17      | NM_001032394  | 6           | 1.43E+08        | c.2367G>C          | 1                 | 0                 |
| AGTR2                   | P50052                  | p.R182X               | exon3       | NM_000686     | X           | 1.15E+08        | c.544C>T           | 0.01              | 0.004             |
| AKAP13                  | Q12802                  | p.T2795P              | exon36      | NM_006738     | 15          | 86287035        | c.8383A>C          | 0                 | 0.997             |
| ANAPC1                  | Q9H1A4                  | p.Q451H               | exon11      | NM_022662     | 2           | 1.13E+08        | c.1353G>C          | 0.95              | 0                 |
| APC2                    | O95996                  | p.F2256S              | exon15      | NM_005883     | 19          | 1470067         | c.6767T>C          | 0.13              | 0.728             |
| AQP7                    | O14520                  | p.E202D               | exon7       | NM_001170     | 9           | 33385784        | c.606G>C           | 0                 | 0.053             |
| ASB7                    | Q9H672                  | p.H91R                | exon5       | NM_024708     | 15          | 1.01E+08        | c.272A>G           | 0.37              |                   |
| ASL                     | P04424                  | p.E214D               | exon8       | NM_001024944  | 7           | 65552360        | c.642G>T           | 0.26              | 0.001             |
| ATP8A2                  | Q9NTI2                  | p.L624F               | exon22      | NM_016529     | 13          | 26153950        | c.1872G>T          | 0.02              | 0.899             |
| ATRNL1                  | Q5VV63                  | p.C961G               | exon18      | NM_207303     | 10          | 1.17E+08        | c.2881T>G          | 0                 | 1                 |
| BRD8                    | Q9H0E9                  | p.G298C               | exon10      | NM_006696     | 5           | 1.38E+08        | c.892G>T           | 1                 |                   |
| BTBD16                  | Q32M84                  | p.T297N               | exon10      | NM_144587     | 10          | 1.24E+08        | c.890C>A           | 0.07              | 0.206             |
| C20orf96                | Q9NUD7                  | p.P8H                 | exon2       | NM_153269     | 20          | 270946          | c.23C>A            | 0                 | 0.998             |
| C22orf39                | Q6P5X5                  | p.R25G                | exon1       | NM_001166242  | 22          | 19435250        | c.73C>G            | 0.98              | 0.999             |
| C2CD2                   | Q9Y426                  | p.A79G                | exon1       | NM_015500     | 21          | 43373522        | c.236C>G           | 0                 |                   |
| C2CD3                   | Q4AC94                  | p.Y1745D              | exon27      | NM_015531     | 11          | 73760510        | c.5233T>G          | 0.25              | 0.405             |
| CACNA1H                 | O95180                  | p.T1615P              | exon27      | NM_021098     | 16          | 1263845         | c.4843A>C          | 0                 |                   |
| CAPN12                  | Q6ZSI9                  | p.R413G               | exon10      | NM_144691     | 19          | 39227921        | c.1237C>G          | 0.41              | 0                 |
| CASK                    | O14936                  | p.G306C               | exon10      | NM_001126054  | X           | 41485956        | c.916G>T           | 0                 |                   |
| CCDC180                 | Q9P1Z9                  | p.L536M               | exon14      | NM_020893     | 9           | 1E+08           | c.1606C>A          | 0                 |                   |
| CCDC60                  | Q8IWA6                  | p.D33E                | exon2       | NM_178499     | 12          | 1.2E+08         | c.99C>A            | 0.09              |                   |
| CENPV                   | Q7Z7K6                  | p.S35G                | exon1       | NM_181716     | 17          | 16256648        | c.103A>G           | 0.13              | 0.693             |
| CFAP91                  | Q7Z4T9                  | p.Q533K               | exon13      | NM_033364     | 3           | 1.19E+08        | c.1597C>A          | 0                 | 0.992             |
| CFH                     | P08603                  | p.P346T               | exon8       | NM_000186     | 1           | 1.97E+08        | c.1036C>A          | 0.18              | 0.726             |

|         |        |          |         |              |    |          |           |      |       |
|---------|--------|----------|---------|--------------|----|----------|-----------|------|-------|
| CGNL1   | Q0VF96 | p.E898D  | exon11  | NM_001252335 | 15 | 57810674 | c.2694G>T | 0.83 | 0.027 |
| CHIT1   | Q13231 | p.A359G  | exon10  | NM_003465    | 1  | 2.03E+08 | c.1076C>G | 0    | 0.187 |
| CHIT1   | Q13231 | p.W358X  | exon10  | NM_003465    | 1  | 2.03E+08 | c.1073G>A | 0    | 0.999 |
| CLIP1   | P30622 | p.L271F  | exon5   | NM_198240    | 12 | 1.23E+08 | c.813G>T  |      | 0.998 |
| CMTR1   | Q8N1G2 | p.R672Q  | exon19  | NM_015050    | 6  | 37443167 | c.2015G>A | 0    | 0.999 |
| CNN3    | Q15417 | p.L65Q   | exon3   | NM_001839    | 1  | 95368730 | c.194T>A  | 0.01 | 0.989 |
| COL15A1 | P39059 | p.P653T  | exon15  | NM_001855    | 9  | 1.02E+08 | c.1957C>A | 0.09 | 0.951 |
| COL7A1  | Q02388 | p.S2564I | exon103 | NM_000094    | 3  | 48606284 | c.7691G>T | 0.01 | 0.783 |
| CRY2    | Q96524 | p.P508T  | exon11  | NM_001127457 | 11 | 45893705 | c.1522C>A | 0    | 0.727 |
| CUL1    | Q13616 | p.A467S  | exon13  | NM_003592    | 7  | 1.48E+08 | c.1399G>T | 0.2  | 0     |
| CYP2J2  | P51589 | p.W322C  | exon6   | NM_000775    | 1  | 60373495 | c.966G>T  | 0.02 | 0.89  |
| CYP4F2  | P78329 | p.T472A  | exon13  | NM_001082    | 19 | 15989730 | c.1414A>G | 0.01 |       |
| DBF4    | Q9UBU7 | p.E77D   | exon3   | NM_006716    | 7  | 87514305 | c.231A>C  | 0.05 | 0.717 |
| DMAP1   | Q9NPF5 | p.H362N  | exon10  | NM_001034023 | 1  | 44685721 | c.1084C>A | 0    |       |
| DOCK8   | Q8NF50 | p.Y1969X | exon45  | NM_001190458 | 9  | 463655   | c.5907C>A | 0    |       |
| DPP9    | Q86TI2 | p.T144A  | exon6   | NM_139159    | 19 | 4704313  | c.430A>G  | 0.05 |       |
| DPY19L1 | Q2PZI1 | p.P254H  | exon9   | NM_015283    | 7  | 35009079 | c.761C>A  | 0.03 | 0     |
| DSPP    | Q9NZW4 | p.N934D  | exon5   | NM_014208    | 4  | 88536614 | c.2800A>G | 0.75 | 0     |
| DYNC1H1 | Q14204 | p.D937E  | exon10  | NM_001376    | 14 | 1.02E+08 | c.2811C>A | 0    | 1     |
| EP400   | Q96L91 | p.H31P   | exon2   | NM_015409    | 12 | 1.32E+08 | c.92A>C   | 0    | 0.998 |
| EPPK1   | P58107 | p.R2239H | exon1   | NM_031308    | 8  | 1.45E+08 | c.6716G>A | 0    | 0.149 |
| ERN2    | Q76MJ5 | p.T202P  | exon6   | NM_033266    | 16 | 23718102 | c.604A>C  | 0.28 | 0     |
| FAM104B | Q5XKR9 | p.S51N   | exon3   | NM_001166700 | X  | 55172716 | c.152G>A  | 0.01 | 0.999 |
| FAM71D  | Q8N9W8 | p.A113E  | exon4   | NM_173526    | 14 | 67669989 | c.338C>A  | 0.07 | 0.125 |
| FERMT3  | Q86UX7 | p.V45G   | exon2   | NM_178443    | 11 | 63974970 | c.134T>G  | 0.01 | 0.003 |
| FDFT1   | P37268 | p.R110W  | exon5   | NM_004462    | 8  | 11809797 | c.328C>T  | 0.01 |       |
| FDFT1   | P37268 | p.Y174C  | exon7   | NM_004462    | 8  | 11826034 | c.521A>G  | 0.48 | 0.735 |
| FDFT1   | P37268 | p.N205S  | exon7   | NM_004462    | 8  | 11826127 | c.614A>G  | 0    | 1     |
| FDFT1   | P37268 | p.N215S  | exon7   | NM_004462    | 8  | 11826157 | c.644A>G  | 0.34 | 0.081 |
| FDFT1   | P37268 | p.R317W  | exon9   | NM_004462    | 8  | 11831587 | c.949C>T  | 0    | 0.489 |

|          |        |          |        |              |    |          |           |      |       |
|----------|--------|----------|--------|--------------|----|----------|-----------|------|-------|
| FDFT1    | P37268 | p.I345M  | exon10 | NM_004462    | 8  | 11838390 | c.1035T>G | 0    |       |
| FLG      | P20930 | p.T2235R | exon3  | NM_002016    | 1  | 1.52E+08 | c.6704C>G |      |       |
| FOXK1    | P85037 | p.T683P  | exon9  | NM_001037165 | 7  | 4801940  | c.2047A>C |      |       |
| FSTL1    | Q12841 | p.A7P    | exon2  | NM_007085    | 3  | 1.2E+08  | c.19G>C   | 0.03 | 0.02  |
| GAS8     | O95995 | p.S57G   | exon1  | NM_001214    | 16 | 90095582 | c.169A>G  | 0.04 | 0.001 |
| GAS8     | O95995 | p.V44A   | exon1  | NM_001214    | 16 | 90095620 | c.131T>C  | 0.51 | 0.253 |
| GBP7     | Q8N8V2 | p.T482S  | exon9  | NM_207398    | 1  | 89607253 | c.1444A>T | 0.03 |       |
| GCKR     | Q14397 | p.V102F  | exon4  | NM_001486    | 2  | 27721140 | c.304G>T  | 0.08 |       |
| GIGYF2   | Q6Y7W6 | p.P1211Q | exon26 | NM_001103148 | 2  | 2.34E+08 | c.3632C>A | 0.87 | 0.085 |
| GPER     | Q99527 | p.E218Q  | exon2  | NM_001505    | 7  | 1132016  | c.652G>C  | 0.49 | 0.291 |
| GSN      | P06396 | p.S511R  | exon14 | NM_001127664 | 9  | 1.24E+08 | c.1533C>A | 0    | 0.51  |
| HERC2    | O95714 | p.F544L  | exon13 | NM_004667    | 15 | 28511089 | c.1630T>C | 0    | 0.998 |
| HLA-A    | P30443 | p.A48S   | exon2  | NM_002116    | 6  | 29910602 | c.142G>T  | 0.01 | 0     |
| HLA-DRB1 | P01911 | p.H87L   | exon2  | NM_001243965 | 6  | 32551970 | c.260A>T  | 0.46 | 0     |
| HMCN1    | Q96RW7 | p.Y2941D | exon57 | NM_031935    | 1  | 1.86E+08 | c.8821T>G | 0    | 0.999 |
| HMX1     | P32339 | p.A269P  | exon2  | NM_018942    | 4  | 8869661  | c.805G>C  | 0.01 | 0.992 |
| HRCT1    | Q6UXD1 | p.R108H  | exon1  | NM_001039792 | 9  | 35906607 | c.323G>A  | 0.11 | 0     |
| IFNA7    | P01567 | p.V11L   | exon1  | NM_021057    | 9  | 21202134 | c.31G>T   | 0.45 | 0     |
| IFNK     | Q9P0W0 | p.V154F  | exon1  | NM_020124    | 9  | 27524794 | c.460G>T  | 0.22 | 0     |
| IGSF3    | O75054 | p.E446D  | exon7  | NM_001542    | 1  | 1.17E+08 | c.1338G>C | 0.19 | 0.589 |
| IGSF3    | O75054 | p.E434G  | exon7  | NM_001542    | 1  | 1.17E+08 | c.1301A>G | 0    | 0.997 |
| IGSF3    | O75054 | p.R680Q  | exon8  | NM_001542    | 1  | 1.17E+08 | c.2039G>A | 0.13 | 0.74  |
| IGSF9    | Q9P2J2 | p.C395X  | exon10 | NM_001135050 | 1  | 1.6E+08  | c.1185C>A | 0    |       |
| IQSEC2   | Q5JU85 | p.S1444P | exon15 | NM_001111125 | X  | 53263538 | c.4330T>C | 0.01 | 0.535 |
| ITGB4    | P16144 | p.Q478H  | exon12 | NM_001005731 | 17 | 73728300 | c.1434G>T | 0.1  | 0.001 |
| ITPR1    | Q14643 | p.G1159E | exon29 | NM_001099952 | 3  | 4725969  | c.3476G>A | 0    |       |
| KCNIP4   | Q6PIL6 | p.A5T    | exon1  | NM_025221    | 4  | 20884321 | c.13G>A   |      |       |
| KIAA0226 | RUBCN  | p.A943G  | exon20 | NM_014687    | 3  | 1.97E+08 | c.2828C>G | 0.17 | 0.042 |
| KIF18A   | Q8NI77 | p.R227H  | exon5  | NM_031217    | 11 | 28112183 | c.680G>A  | 0    | 0.557 |
| KMT2C    | Q8NEZ4 | p.R284Q  | exon7  | NM_170606    | 7  | 1.52E+08 | c.851G>A  | 0    | 0.957 |

|          |        |           |        |              |    |          |            |      |       |
|----------|--------|-----------|--------|--------------|----|----------|------------|------|-------|
| KMT2D    | O14686 | p.K2185N  | exon28 | NM_014727    | 19 | 36224005 | c.6555A>C  | 0.02 | 0.716 |
| KNL1     | Q8NG31 | p.S25X    | exon3  | NM_170589    | 15 | 40897346 | c.74C>A    | 0.29 |       |
| KRT4     | P19013 | p.G87A    | exon1  | NM_002272    | 12 | 53207583 | c.260G>C   | 0.3  |       |
| KRT8     | P05787 | p.M406I   | exon8  | NM_001256293 | 12 | 53292288 | c.1218G>T  | 0.18 | 0     |
| KRTAP4-3 | Q9BYR4 | p.S103T   | exon1  | NM_033187    | 17 | 39324117 | c.308G>C   | 0.07 | 0.988 |
| KRTAP4-8 | Q9BYQ9 | p.S68R    | exon1  | NM_031960    | 17 | 39254133 | c.204C>A   | 0.15 | 0.049 |
| KRTAP5-1 | Q6L8H4 | p.A166G   | exon1  | NM_001005922 | 11 | 1605983  | c.497C>G   | 0    | 0.925 |
| LILRA6   | Q6PI73 | p.Y350X   | exon6  | NM_024318    | 19 | 54744358 | c.1050T>G  | 0    | 0.394 |
| LILRB3   | O75022 | p.Q53L    | exon3  | NM_006864    | 19 | 54726347 | c.158A>T   | 0.02 | 0.205 |
| LILRB3   | O75022 | p.T6A     | exon1  | NM_006864    | 19 | 54726833 | c.16A>G    | 0.22 | 0.001 |
| MAGEB6   | Q8N7X4 | p.Y124S   | exon2  | NM_173523    | X  | 26212334 | c.371A>C   | 1    | 0.002 |
| MAGEC1   | O60732 | p.S185R   | exon4  | NM_005462    | X  | 1.41E+08 | c.555T>A   | 0.04 | 0.892 |
| MAGEC1   | O60732 | p.P189T   | exon4  | NM_005462    | X  | 1.41E+08 | c.565C>A   |      |       |
| MAP1B    | P46821 | p.D591E   | exon5  | NM_005909    | 5  | 71490955 | c.1773C>A  | 0.45 |       |
| MAP2K7   | O14733 | p.R276W   | exon7  | NM_145185    | 19 | 7976015  | c.826C>T   | 0    | 0.998 |
| MATR3    | P43243 | p.S807X   | exon14 | NM_001194955 | 5  | 1.39E+08 | c.2420C>A  | 1    |       |
| MEGF10   | Q96KG7 | p.G795S   | exon19 | NM_001256545 | 5  | 1.27E+08 | c.2383G>A  | 0.22 | 0.369 |
| MFSD14B  | Q5SR56 | p.F79V    | exon3  | NM_032558    | 9  | 97191501 | c.235T>G   | 0.02 | 0.991 |
| MTCL1    | Q9Y4B5 | p.N958K   | exon13 | NM_015210    | 18 | 8818975  | c.2874C>A  | 0    | 0.512 |
| MTHFR    | P42898 | p.L150M   | exon3  | NM_005957    | 1  | 11861245 | c.448C>A   | 0    | 0.547 |
| MTMR9    | Q96QG7 | p.R77X    | exon2  | NM_015458    | 8  | 11152749 | c.229C>T   | 0.07 | 0.735 |
| MUC16    | Q8WXI7 | p.K13414E | exon51 | NM_024690    | 19 | 9002576  | c.40240A>G | 0.4  |       |
| MUC4     | Q99102 | p.H3709Q  | exon2  | NM_018406    | 3  | 1.96E+08 | c.11127C>G | 1    |       |
| MUC4     | Q99102 | p.T3710A  | exon2  | NM_018406    | 3  | 1.96E+08 | c.11128A>G | 0.6  | 0     |
| MUC6     | Q6W4X9 | p.T1987P  | exon31 | NM_005961    | 11 | 1016842  | c.5959A>C  | 0.1  | 0.251 |
| MUC6     | Q6W4X9 | p.G1581E  | exon31 | NM_005961    | 11 | 1018059  | c.4742G>A  | 0.04 | 0.001 |
| UQCR5    | P47985 | p.R92H    | exon2  | NM_005961    | 13 | 29208098 | c.275G>A   | 0    | 0.735 |
| UQCR5    | P47985 | p.R177C   | exon2  | NM_005961    | 13 | 29207844 | c.529C>T   | 1    | 0     |
| NAF1     | Q96HR8 | p.D158Y   | exon2  | NM_138386    | 4  | 1.64E+08 | c.472G>T   | 0.01 | 0.004 |
| NFKB1    | P19838 | p.R186W   | exon7  | NM_001165412 | 4  | 1.03E+08 | c.556C>T   | 0    | 0.997 |

|          |        |          |        |              |    |          |           |      |       |
|----------|--------|----------|--------|--------------|----|----------|-----------|------|-------|
| NFKB1    | P19838 | p.E206X  | exon8  | NM_001165412 | 4  | 1.04E+08 | c.616G>T  | 0.95 | 0     |
| NKX2-8   | O15522 | p.V89G   | exon2  | NM_014360    | 14 | 37050561 | c.266T>G  | 0.13 | 0.728 |
| NOC4L    | Q9BVI4 | p.D292Y  | exon9  | NM_024078    | 12 | 1.33E+08 | c.874G>T  | 0    | 0.053 |
| NOTCH2NL | Q7Z3S9 | p.T158I  | exon4  | NM_203458    | 1  | 1.45E+08 | c.473C>T  | 0.37 |       |
| NPEPPS   | P55786 | p.S653I  | exon17 | NM_006310    | 17 | 45682781 | c.1958G>T | 0.26 | 0.001 |
| OR2L3    | Q8NG85 | p.G196C  | exon1  | NM_001004687 | 1  | 2.48E+08 | c.586G>T  | 0.02 | 0.899 |
| OR2T29   | Q8NH02 | p.S61T   | exon1  | NM_001004694 | 1  | 2.49E+08 | c.182G>C  | 0    | 1     |
| UQCR5    | P47985 | p.R177H  | exon2  | NM_006003    | 13 | 29207843 | c.530G>A  | 1    |       |
| UQCR5    | P47985 | p.D201H  | exon2  | NM_006003    | 13 | 29207772 | c.601G>C  | 0.07 | 0.206 |
| OR8U1    | Q8NH10 | p.H229R  | exon1  | NM_001005204 | 11 | 56143785 | c.686A>G  | 0    | 0.998 |
| OTOP1    | Q7RTM1 | p.K56R   | exon1  | NM_177998    | 4  | 4228425  | c.167A>G  | 0.98 | 0.999 |
| PABPC1   | P11940 | p.T48P   | exon1  | NM_002568    | 8  | 1.02E+08 | c.142A>C  | 0    |       |
| PAPLN    | O95428 | p.G620V  | exon15 | NM_173462    | 14 | 73726208 | c.1859G>T | 0.25 | 0.405 |
| PHF21A   | Q96BD5 | p.S324R  | exon9  | NM_001101802 | 11 | 45986887 | c.972C>A  | 0    |       |
| PIEZO2   | Q9H5I5 | p.S2546L | exon49 | NM_022068    | 18 | 10677849 | c.7637C>T | 0.41 | 0     |
| PLEKHA6  | Q9Y2H5 | p.A801D  | exon17 | NM_014935    | 1  | 2.04E+08 | c.2402C>A | 0    |       |
| PLIN4    | Q96Q06 | p.V661A  | exon3  | NM_001080400 | 19 | 4511948  | c.1982T>C | 0    |       |
| PLXNB3   | Q9ULL4 | p.A1010S | exon19 | NM_001163257 | X  | 1.53E+08 | c.3028G>T | 0.09 |       |
| POLR2E   | P19388 | p.V209G  | exon7  | NM_002695    | 19 | 1089492  | c.626T>G  | 0.13 | 0.693 |
| POLR3F   | Q9H1D9 | p.E315Q  | exon9  | NM_006466    | 20 | 18464194 | c.943G>C  | 0    | 0.992 |
| POT1     | Q9NUX5 | p.V52G   | exon8  | NM_001042594 | 7  | 1.24E+08 | c.155T>G  | 0.18 | 0.726 |
| POU4F2   | Q12837 | p.A168V  | exon2  | NM_004575    | 4  | 1.48E+08 | c.503C>T  | 0.83 | 0.027 |
| PRG4     | Q92954 | p.K482E  | exon5  | NM_001127709 | 1  | 1.86E+08 | c.1444A>G | 0    | 0.187 |
| PRG4     | Q92954 | p.T367A  | exon5  | NM_001127709 | 1  | 1.86E+08 | c.1099A>G | 0    | 0.999 |
| PRR21    | Q8WXC7 | p.G58S   | exon1  | NM_001080835 | 2  | 2.41E+08 | c.172G>A  |      | 0.998 |
| PRSS3    | P35030 | p.G208R  | exon5  | NM_002771    | 9  | 33799056 | c.622G>A  | 0    | 0.999 |
| PTAR1    | Q7Z6K3 | p.E110X  | exon4  | NM_001099666 | 9  | 72349166 | c.328G>T  | 0.01 | 0.989 |
| PTPN21   | Q16825 | p.Y569S  | exon13 | NM_007039    | 14 | 88946069 | c.1706A>C | 0.09 | 0.951 |
| RECQL4   | O94761 | p.S280N  | exon5  | NM_004260    | 8  | 1.46E+08 | c.839G>A  | 0.01 | 0.783 |
| ROBO1    | Q9Y6N7 | p.P683H  | exon15 | NM_002941    | 3  | 78711183 | c.2048C>A | 0    | 0.727 |

|          |        |          |        |              |    |          |            |      |       |
|----------|--------|----------|--------|--------------|----|----------|------------|------|-------|
| RTKN2    | Q8IZC4 | p.P413Q  | exon11 | NM_145307    | 10 | 63959569 | c.1238C>A  | 0.2  | 0     |
| SCRIB    | Q14160 | p.R733L  | exon17 | NM_015356    | 8  | 1.45E+08 | c.2198G>T  | 0.02 | 0.89  |
| SDK1     | Q7Z5N4 | p.T256P  | exon11 | NM_001079653 | 7  | 4247821  | c.766A>C   | 0.01 |       |
| SELENOT  | P62341 | p.G121V  | exon3  | NM_016275    | 3  | 1.5E+08  | c.362G>T   | 0.05 | 0.717 |
| SLC16A14 | Q7RTX9 | p.L92F   | exon3  | NM_152527    | 2  | 2.31E+08 | c.276G>T   | 0    |       |
| SLC2A3   | P11169 | p.E482G  | exon10 | NM_006931    | 12 | 8074055  | c.1445A>G  | 0    |       |
| SLC7A7   | Q9UM01 | p.S386R  | exon9  | NM_001126106 | 14 | 23243650 | c.1158C>A  | 0.05 |       |
| SLC9A3R1 | O14745 | p.V60G   | exon1  | NM_004252    | 17 | 72745164 | c.179T>G   | 0.03 | 0     |
| SMPD4    | Q9NXE4 | p.F484V  | exon15 | NM_017951    | 2  | 1.31E+08 | c.1450T>G  | 0.75 | 0     |
| SNED1    | Q8TER0 | p.T1241P | exon25 | NM_001080437 | 2  | 2.42E+08 | c.3721A>C  | 0    | 1     |
| SNRNP40  | Q96DI7 | p.A57S   | exon2  | NM_004814    | 1  | 31766168 | c.169G>T   | 0    | 0.998 |
| SOGA3    | Q5TF21 | p.E212G  | exon2  | NM_001012279 | 6  | 1.28E+08 | c.635A>G   | 0    | 0.149 |
| SORCS2   | Q96PQ0 | p.L181M  | exon2  | NM_020777    | 4  | 7398075  | c.541C>A   | 0.28 | 0     |
| SPEG     | Q15772 | p.T3254P | exon41 | NM_005876    | 2  | 2.2E+08  | c.9760A>C  | 0.01 | 0.999 |
| SPPL3    | Q8TCT6 | p.R182P  | exon7  | NM_139015    | 12 | 1.21E+08 | c.545G>C   | 0.07 | 0.125 |
| SSC5D    | A1L4H1 | p.Y1312H | exon14 | NM_001144950 | 19 | 56029577 | c.3934T>C  | 0.01 | 0.003 |
| SSPO     | A2VEC9 | p.G3700R | exon78 | NM_198455    | 7  | 1.5E+08  | c.11098G>C | 0.01 |       |
| STK4     | Q13043 | p.P19S   | exon1  | NM_020998    | 3  | 49726070 | c.55C>T    | 0.48 | 0.735 |
| SVEP1    | Q4LDE5 | p.A634D  | exon9  | NM_153366    | 9  | 1.13E+08 | c.1901C>A  | 0    | 1     |
| TAS2R31  | P59538 | p.E151Q  | exon1  | NM_176885    | 12 | 11183484 | c.451G>C   | 0.34 | 0.081 |
| TBC1D22B | Q9NU19 | p.S224X  | exon5  | NM_017772    | 6  | 37250727 | c.671C>A   | 0    | 0.489 |
| TBX21    | Q9UL17 | p.T180P  | exon2  | NM_013351    | 17 | 45820022 | c.538A>C   | 0    |       |
| TIGAR    | Q9NQ88 | p.L217F  | exon6  | NM_020375    | 12 | 4461695  | c.651A>C   |      |       |
| TLL2     | Q9Y6L7 | p.C588G  | exon14 | NM_012465    | 10 | 98146800 | c.1762T>G  |      |       |
| TMCO3    | Q6UWJ1 | p.S109Y  | exon2  | NM_017905    | 13 | 1.14E+08 | c.326C>A   | 0.03 | 0.02  |
| TMEM128  | Q5BJH2 | p.V134I  | exon4  | NM_032927    | 4  | 4239589  | c.400G>A   | 0.04 | 0.001 |
| TMEM259  | Q4ZIN3 | p.A387P  | exon9  | NM_001033026 | 19 | 1011424  | c.1159G>C  | 0.51 | 0.253 |
| TMEM268  | Q5VZI3 | p.Q270K  | exon8  | NM_153045    | 9  | 1.17E+08 | c.808C>A   | 0.03 |       |
| TMTC1    | Q8IUR5 | p.Y41X   | exon1  | NM_001193451 | 12 | 29936562 | c.123C>A   | 0.08 |       |
| TMTC2    | Q8N394 | p.R139G  | exon2  | NM_152588    | 12 | 83251120 | c.415C>G   | 0.87 | 0.085 |

|         |        |          |        |              |    |          |            |      |       |
|---------|--------|----------|--------|--------------|----|----------|------------|------|-------|
| TNPO1   | Q92973 | p.R805T  | exon22 | NM_153188    | 5  | 72196824 | c.2414G>C  | 0.49 | 0.291 |
| TPSD1   | Q9BZJ3 | p.I87V   | exon3  | NM_012217    | 16 | 1306802  | c.259A>G   | 0    | 0.51  |
| TREML2  | Q5T2D2 | p.V50M   | exon2  | NM_024807    | 6  | 41166075 | c.148G>A   | 0    | 0.998 |
| TRIM65  | Q6PJ69 | p.A132S  | exon1  | NM_173547    | 17 | 73892625 | c.394G>T   | 0.01 | 0     |
| TRIM72  | Q6ZMU5 | p.P320L  | exon7  | NM_001008274 | 16 | 31235601 | c.959C>T   | 0.46 | 0     |
| TTC37   | Q6PGP7 | p.A830S  | exon23 | NM_014639    | 5  | 94852403 | c.2488G>T  | 0    | 0.999 |
| UBE2D1  | P51668 | p.Q34K   | exon3  | NM_003338    | 10 | 60121266 | c.100C>A   | 0.01 | 0.992 |
| UBR4    | Q5T4S7 | p.Q3358K | exon68 | NM_020765    | 1  | 19447752 | c.10072C>A | 0.11 | 0     |
| UBXN11  | Q5T124 | p.G372S  | exon11 | NM_001077262 | 1  | 26608879 | c.1114G>A  | 0.45 | 0     |
| UNC13D  | Q70J99 | p.V63F   | exon3  | NM_199242    | 17 | 73839314 | c.187G>T   | 0.22 | 0     |
| UNC5B   | Q8IZJ1 | p.R755H  | exon14 | NM_170744    | 10 | 73055656 | c.2264G>A  | 0.19 | 0.589 |
| USB1    | Q9BQ65 | p.H208N  | exon6  | NM_024598    | 16 | 58052888 | c.622C>A   | 0    | 0.997 |
| USP43   | Q70EL4 | p.G739R  | exon14 | NM_153210    | 17 | 9615329  | c.2215G>C  | 0.13 | 0.74  |
| USP8    | P40818 | p.R763W  | exon16 | NM_001128611 | 15 | 50784950 | c.2287C>T  | 0    |       |
| USP8    | P40818 | p.N764K  | exon16 | NM_001128611 | 15 | 50784955 | c.2292C>A  | 0.01 | 0.535 |
| VGf     | O15240 | p.A325G  | exon2  | NM_003378    | 7  | 1.01E+08 | c.974C>G   | 0.1  | 0.001 |
| VPS39   | Q96JC1 | p.R650L  | exon19 | NM_015289    | 15 | 42456633 | c.1949G>T  | 0    |       |
| WDR88   | Q6ZMY6 | p.L72F   | exon1  | NM_173479    | 19 | 33623291 | c.216G>T   |      |       |
| WNK2    | Q9Y3S1 | p.V1801G | exon22 | NM_006648    | 9  | 96055149 | c.5402T>G  | 0.17 | 0.042 |
| ZBTB48  | P10074 | p.H425Y  | exon7  | NM_005341    | 1  | 6647586  | c.1273C>T  | 0    | 0.551 |
| ZBTB9   | Q96C00 | p.R109P  | exon2  | NM_152735    | 6  | 33423203 | c.326G>C   | 0    | 0.957 |
| ZFPM1   | Q8IX07 | p.E444D  | exon10 | NM_153813    | 16 | 88599698 | c.1332G>C  | 0.02 | 0.716 |
| ZNF185  | O15231 | p.D400Y  | exon15 | NM_007150    | X  | 1.52E+08 | c.1198G>T  | 0.29 |       |
| ZNF2    | Q9BSG1 | p.E17K   | exon3  | NM_021088    | 2  | 95843243 | c.49G>A    | 0.3  |       |
| ZNF492  | Q9P255 | p.A40T   | exon3  | NM_020855    | 19 | 22836805 | c.118G>A   | 0.18 | 0     |
| ZNF717  | Q9BY31 | p.M51I   | exon3  | NM_001128223 | 3  | 75790792 | c.153G>T   | 0.07 | 0.988 |
| ZNF83   | P51522 | p.A277V  | exon4  | NM_001105552 | 19 | 53116988 | c.830C>T   | 0.15 | 0.049 |
| ZSCAN18 | Q8TBC5 | p.S224T  | exon3  | NM_001145542 | 19 | 58600105 | c.671G>C   | 0    | 0.925 |



Supplementary Table 6. SAAVs in MT-specific sample.

| Protein Variants | Accession number | Protein_Change | Chrs | Exon   | Position | cDNA_Change | SIFT Score | PolyPhenV2 |
|------------------|------------------|----------------|------|--------|----------|-------------|------------|------------|
| ABCA7            | Q8IZY2           | p.T1883M       | 19   | exon42 | 1062248  | c.5648C>T   | 0          | 0.999      |
| ACTN1            | P12814           | p.Q634H        | 14   | exon16 | 69349226 | c.1902G>T   | 0.04       | 0.007      |
| AEBP2            | Q6ZN18           | p.C297X        | 12   | exon3  | 19626193 | c.891C>A    | 0          |            |
| AFF1             | P51825           | p.Q733K        | 4    | exon12 | 88036182 | c.2197C>A   | 0.55       | 0.444      |
| ANKRD33B         | A6NCL7           | p.Q115P        | 5    | exon1  | 10564923 | c.344A>C    | 0.1        |            |
| ANKS1A           | Q92625           | p.G49S         | 6    | exon1  | 34857324 | c.145G>A    | 0.65       | 0          |
| APC              | P25054           | p.Q775X        | 5    | exon14 | 1.12E+08 | c.2323C>T   | 0.17       | 0.733      |
| ARMC12           | Q5T9G4           | p.L172P        | 6    | exon3  | 35706285 | c.515T>C    | 0.12       | 0.877      |
| ASTN2            | O75129           | p.A226S        | 9    | exon5  | 1.19E+08 | c.676G>T    | 0.01       | 0.445      |
| BRE              | O75150           | p.T284R        | 2    | exon10 | 28464260 | c.851C>G    | 0.06       | 0.121      |
| BTRC             | Q9Y297           | p.L556F        | 10   | exon13 | 1.03E+08 | c.1666C>T   | 0.32       | 0          |
| C16orf62         | Q7Z3J2           | p.V71G         | 16   | exon1  | 19566996 | c.212T>G    | 0          |            |
| CACHD1           | Q5VU97           | p.I1035M       | 1    | exon24 | 65145291 | c.3105C>G   | 0.24       | 0.032      |
| CASKIN2          | Q8WXE0           | p.E487G        | 17   | exon14 | 73500303 | c.1460A>G   | 0          | 0.932      |
| CCDC63           | Q8NA47           | p.D13N         | 12   | exon3  | 1.11E+08 | c.37G>A     | 0.41       | 0.006      |
| CES5A            | Q6NT32           | p.E475K        | 16   | exon11 | 55883536 | c.1423G>A   | 0.41       |            |
| CNTD1            | Q8N815           | p.Q94K         | 17   | exon3  | 40956277 | c.280C>A    | 0.75       | 0.365      |
| CNTN5            | O94779           | p.R53X         | 11   | exon4  | 99690376 | c.157C>T    | 1          |            |
| COL5A2           | P05997           | p.G321V        | 2    | exon15 | 1.9E+08  | c.962G>T    | 0          | 0.996      |
| COPS6            | Q7L5N1           | p.T294S        | 7    | exon10 | 99689309 | c.881C>G    | 0.01       | 0.002      |
| COPZ2            | Q9P299           | p.G22A         | 17   | exon1  | 46115075 | c.65G>C     |            |            |
| CRELD2           | Q6UXH1           | p.A243T        | 22   | exon7  | 50316920 | c.727G>A    | 0.35       | 0.023      |
| CUBN             | O60494           | p.L2370I       | 10   | exon46 | 16957922 | c.7108C>A   | 0.23       | 0.085      |
| CYP27B1          | O15528           | p.D418E        | 12   | exon8  | 58157553 | c.1254C>A   | 0.02       | 0.998      |
| DDX51            | Q8N8A6           | p.G114E        | 12   | exon2  | 1.33E+08 | c.341G>A    | 0.45       | 0.001      |
| DIAPH2           | O60879           | p.L751I        | X    | exon20 | 96354696 | c.2251C>A   | 0.01       | 0.782      |
| DPP6             | P42658           | p.A20T         | 7    | exon1  | 1.54E+08 | c.58G>A     | 0.01       |            |
| DPYSL3           | Q14195           | p.P305T        | 5    | exon9  | 1.47E+08 | c.913C>A    | 0          | 1          |

|         |        |          |    |        |          |           |      |       |
|---------|--------|----------|----|--------|----------|-----------|------|-------|
| DRP2    | Q13474 | p.R492W  | X  | exon14 | 1.01E+08 | c.1474C>T | 0    | 1     |
| EIF5AL1 | Q6IS14 | p.V137L  | 10 | exon1  | 81272814 | c.409G>C  |      |       |
| ELL2    | O00472 | p.G161V  | 5  | exon5  | 95242486 | c.482G>T  | 0.06 | 0.932 |
| EMB     | Q6PCB8 | p.D95Y   | 5  | exon3  | 49707131 | c.283G>T  | 0.01 | 0.838 |
| ESYT1   | Q9BSJ8 | p.D1097E | 12 | exon31 | 56537622 | c.3291C>A | 0.47 | 0.875 |
| FAM104B | Q5XKR9 | p.E40V   | X  | exon2  | 55185563 | c.119A>T  | 0    | 0.849 |
| FAM131C | Q96AQ9 | p.R107Q  | 1  | exon5  | 16386495 | c.320G>A  | 0.92 | 0.998 |
| FAM135B | Q49AJ0 | p.V67M   | 8  | exon4  | 1.39E+08 | c.199G>A  | 0    | 0.762 |
| FAM26F  | Q5R3K3 | p.A107V  | 6  | exon2  | 1.17E+08 | c.320C>T  | 0.56 | 0.01  |
| FBXL6   | Q8N531 | p.R402Q  | 8  | exon7  | 1.46E+08 | c.1205G>A | 0.5  | 0     |
| FOXH1   | O75593 | p.W77R   | 8  | exon2  | 1.46E+08 | c.229T>A  | 0    | 1     |
| FOXRED1 | Q96CU9 | p.Y325D  | 11 | exon9  | 1.26E+08 | c.973T>G  | 0    | 0.621 |
| FRAS1   | Q86XX4 | p.P2606T | 4  | exon54 | 79396725 | c.7816C>A | 0.14 |       |
| FRY     | Q5TBA9 | p.R1875Q | 13 | exon42 | 32808807 | c.5624G>A | 0    | 1     |
| FZD8    | Q9H461 | p.P644R  | 10 | exon1  | 35928427 | c.1931C>G | 0.08 | 0.011 |
| GABBR2  | O75899 | p.Q386X  | 9  | exon7  | 1.01E+08 | c.1156C>T | 1    | 0.735 |
| GCC1    | Q96CN9 | p.V699A  | 7  | exon2  | 1.27E+08 | c.2096T>C | 0.01 | 0.024 |
| GCNT4   | Q9P109 | p.R388Q  | 5  | exon1  | 74324700 | c.1163G>A | 0    | 1     |
| GEMIN2  | O14893 | p.C221F  | 14 | exon8  | 39601190 | c.662G>T  | 0    | 1     |
| GPR150  | Q8NGU9 | p.P202A  | 5  | exon1  | 94956583 | c.604C>G  | 0.15 | 0.063 |
| GREB1   | Q4ZG55 | p.S1598I | 2  | exon27 | 11772216 | c.4793G>T | 0.05 | 0.485 |
| GRIK3   | Q13003 | p.L386F  | 1  | exon8  | 37319270 | c.1158G>T | 0.27 | 0.954 |
| GXYLT1  | Q4G148 | p.D153V  | 12 | exon3  | 42512830 | c.458A>T  | 0.01 | 0.957 |
| GXYLT1  | Q4G148 | p.H148Q  | 12 | exon3  | 42512844 | c.444T>G  | 0.04 | 0.999 |
| HOXA3   | O43365 | p.S354I  | 7  | exon3  | 27147805 | c.1061G>T | 0.01 | 0.737 |
| HR      | O43593 | p.L673M  | 8  | exon8  | 21980110 | c.2017C>A | 0.03 | 0.191 |
| HS6ST1  | O60243 | p.D87E   | 2  | exon1  | 1.29E+08 | c.261C>A  | 0.02 | 0.999 |
| IGFBP2  | P18065 | p.L22P   | 2  | exon1  | 2.17E+08 | c.65T>C   | 0.1  | 0.483 |
| IGSF3   | O75054 | p.E434G  | 1  | exon7  | 1.17E+08 | c.1301A>G | 0.11 | 0.067 |
| KAZN    | Q674X7 | p.S310T  | 1  | exon6  | 15386680 | c.929G>C  | 0    | 0.664 |
| KCNK18  | Q7Z418 | p.L258F  | 10 | exon3  | 1.19E+08 | c.774G>T  | 0.33 | 0.024 |
| KCNT2   | Q6UVM3 | p.A176S  | 1  | exon7  | 1.96E+08 | c.526G>T  | 0.28 | 0     |
| KIF25   | Q9UIL4 | p.C220X  | 6  | exon7  | 1.68E+08 | c.660C>A  | 0.08 | 0.395 |
| KLF11   | O14901 | p.D2N    | 2  | exon2  | 10186289 | c.4G>A    | 0.01 | 0.99  |

|          |        |          |    |        |          |           |      |        |
|----------|--------|----------|----|--------|----------|-----------|------|--------|
| KRT4     | P19013 | p.G87A   | 12 | exon1  | 53207583 | c.260G>C  | 0.54 | 0.406  |
| LILRA6   | Q6PI73 | p.Y350X  | 19 | exon6  | 54744358 | c.1050T>G | 0.57 | 0.4011 |
| MAP2K3   | P46734 | p.L186W  | 17 | exon8  | 21207813 | c.557T>G  | 0    | 1      |
| MAPKAP1  | Q9BPZ7 | p.M46I   | 9  | exon2  | 1.28E+08 | c.138G>T  | 0.3  | 0.002  |
| MARK2    | Q7KZI7 | p.D338E  | 11 | exon12 | 63669681 | c.1014C>A | 0.04 | 0.003  |
| MAS1L    | P35410 | p.C194F  | 6  | exon1  | 29455099 | c.581G>T  | 0    | 1      |
| MCC      | P23508 | p.G18S   | 5  | exon1  | 1.13E+08 | c.52G>A   | 0    | 0.221  |
| MCTP1    | Q6DN14 | p.L129F  | 5  | exon4  | 94278063 | c.387G>T  | 0    | 0.926  |
| MICAL2   | O94851 | p.L99F   | 11 | exon4  | 12225829 | c.297G>T  | 0.03 | 0.057  |
| MICAL2   | O94851 | p.L99F   | 11 | exon4  | 12225829 | c.297G>T  | 0.03 | 0.057  |
| MIR205HG | G1QLW0 | p.R98G   | 1  | exon4  | 2.1E+08  | c.292A>G  |      |        |
| MITF     | O75030 | p.A258T  | 3  | exon8  | 70008503 | c.772G>A  | 0.17 | 0      |
| KMT2C    | Q8NEZ4 | p.N729D  | 7  | exon14 | 1.52E+08 | c.2185A>G | 0.47 | 0      |
| KMT2C    | Q8NEZ4 | p.S730Y  | 7  | exon14 | 1.52E+08 | c.2189C>A | 0.1  | 0.011  |
| MPG      | P29372 | p.R12W   | 16 | exon2  | 129433   | c.34C>T   | 0    | 0.986  |
| MUC12    | A1L198 | p.D868N  | 7  | exon2  | 1.01E+08 | c.2602G>A |      |        |
| MUC2     | Q02817 | p.P1495T | 11 | exon30 | 1092664  | c.4483C>A | 0.35 |        |
| MUC2     | Q02817 | p.T1498S | 11 | exon30 | 1092674  | c.4493C>G | 0.77 |        |
| MUC2     | Q02817 | p.S1513T | 11 | exon30 | 1092719  | c.4538G>C | 0.89 |        |
| NIPBL    | Q6KC79 | p.L1257I | 5  | exon16 | 37003363 | c.3769C>A | 1    | 0      |
| NKX2-8   | O15522 | p.V89G   | 14 | exon2  | 37050561 | c.266T>G  | 0    | 0.995  |
| NRXN2    | P58401 | p.Q256R  | 11 | exon5  | 64390493 | c.767A>G  | 0.39 | 0.005  |
| OBSCN    | Q5VST9 | p.A1274G | 1  | exon13 | 2.28E+08 | c.3821C>G |      |        |
| OR2T27   | Q8NH04 | p.Y120C  | 1  | exon1  | 2.49E+08 | c.359A>G  | 0.02 | 0.999  |
| OTOP1    | Q7RTM1 | p.K56R   | 4  | exon1  | 4228425  | c.167A>G  | 0    | 0.98   |
| PCMTD1   | Q96MG8 | p.K307E  | 8  | exon6  | 52733066 | c.919A>G  | 0.97 | 0      |
| JADE3    | Q92613 | p.R137C  | X  | exon5  | 46884250 | c.409C>T  | 0    | 0.371  |
| KLHL23   | F7D1B4 | p.R52X   | 2  | exon4  | 1.71E+08 | c.154C>T  | 1    | 0.724  |
| PITRM1   | Q8K411 | p.Q59P   | 10 | exon3  | 3208567  | c.176A>C  | 0.22 |        |
| PKMYT1   | Q99640 | p.R81W   | 16 | exon3  | 3026802  | c.241C>T  | 0.01 | 0.512  |
| PKN3     | Q6P5Z2 | p.L705I  | 9  | exon18 | 1.31E+08 | c.2113C>A | 0    | 0.785  |
| PLEKHN1  | Q494U1 | p.E331G  | 1  | exon10 | 907758   | c.992A>G  | 0.36 | 0      |
| PLIN4    | Q96Q06 | p.G736R  | 19 | exon3  | 4511724  | c.2206G>C | 0.33 |        |
| PLIN4    | Q96Q06 | p.V661A  | 19 | exon3  | 4511948  | c.1982T>C | 0.29 |        |

|         |        |          |    |        |          |           |      |       |
|---------|--------|----------|----|--------|----------|-----------|------|-------|
| POLR2E  | P19388 | p.V209G  | 19 | exon7  | 1089492  | c.626T>G  | 0    | 0.961 |
| POLRMT  | O00411 | p.G923C  | 19 | exon12 | 620077   | c.2767G>T | 0    | 1     |
| PPP1R3A | Q16821 | p.E292D  | 7  | exon3  | 1.14E+08 | c.876G>C  | 0.03 | 0.104 |
| RBMXL1  | Q96E39 | p.K9N    | 1  | exon2  | 89449483 | c.27G>C   | 0    | 0.11  |
| RBMXL3  | Q8N7X1 | p.R393G  | X  | exon1  | 1.14E+08 | c.1177A>G |      |       |
| RERE    | Q9P2R6 | p.S1019P | 1  | exon19 | 8420512  | c.3055T>C | 0.24 | 0.263 |
| RERE    | Q9P2R6 | p.A1018P | 1  | exon19 | 8420515  | c.3052G>C | 0.04 | 0.401 |
| RP1L1   | Q8IWN7 | p.E1305G | 8  | exon4  | 10467694 | c.3914A>G | 0.01 | 0.462 |
| SAA1    | P0DJI8 | p.A56S   | 11 | exon3  | 18290816 | c.166G>T  | 0    | 0.003 |
| SFI1    | A8K8P3 | p.S237R  | 22 | exon8  | 31957324 | c.711C>A  | 0.3  | 0.11  |
| SFRP4   | Q6FHJ7 | p.K324N  | 7  | exon6  | 37947150 | c.972A>C  | 0.05 | 0.514 |
| SIRT6   | Q8N6T7 | p.R291P  | 19 | exon8  | 4174810  | c.872G>C  | 0.15 | 0.989 |
| SRGAP3  | O43295 | p.A510S  | 3  | exon12 | 9074345  | c.1528G>T | 0.82 | 0     |
| STARD8  | Q92502 | p.P918T  | X  | exon12 | 67943660 | c.2752C>A | 0    | 0.997 |
| STK19   | P49842 | p.S307G  | 6  | exon7  | 31948448 | c.919A>G  | 0.11 | 0     |
| SZT2    | Q5T011 | p.P919H  | 1  | exon19 | 43891255 | c.2756C>A | 0.09 | 0.998 |
| TAS2R19 | P59542 | p.F290S  | 12 | exon1  | 11174302 | c.869T>C  | 0.07 | 0.298 |
| TAS2R19 | P59542 | p.F290S  | 12 | exon1  | 11174302 | c.869T>C  | 0.07 | 0.298 |
| TBCD    | Q9BTW9 | p.A422E  | 17 | exon13 | 80772757 | c.1265C>A | 0    |       |
| TBL1X   | O60907 | p.D516N  | X  | exon17 | 9683035  | c.1546G>A | 0.39 | 0.034 |
| TCEAL5  | Q5H9L2 | p.D82E   | X  | exon3  | 1.03E+08 | c.246C>A  | 0.02 | 0     |
| TCF7    | P36402 | p.R339W  | 5  | exon8  | 1.33E+08 | c.1015C>T | 0    | 1     |
| TCHH    | Q07283 | p.L507V  | 1  | exon2  | 1.52E+08 | c.1519C>G |      | 0.363 |
| TFAP2A  | P05549 | p.N50H   | 6  | exon2  | 10410466 | c.148A>C  | 0.02 | 0.899 |
| TMEM163 | Q8TC26 | p.I157L  | 2  | exon5  | 1.35E+08 | c.469A>C  | 0.34 | 0.366 |
| TPRX1   | Q8N7U7 | p.S244P  | 19 | exon2  | 48305538 | c.730T>C  | 0.37 | 0.164 |
| TRIM49C | P0CI26 | p.S298N  | 11 | exon8  | 89774252 | c.893G>A  | 1    |       |
| TRPC4AP | Q8TEL6 | p.C438F  | 20 | exon10 | 33603824 | c.1313G>T | 0    | 1     |
| TSHR    | P16473 | p.T441P  | 14 | exon10 | 81609723 | c.1321A>C | 0    | 0.999 |
| TSHZ1   | Q6ZSZ6 | p.T112P  | 18 | exon2  | 72997831 | c.334A>C  | 0.02 | 0.025 |
| TTC37   | Q6PGP7 | p.G515X  | 5  | exon17 | 94859448 | c.1543G>T | 0.49 | 0.735 |
| TXNRD2  | Q9NNW7 | p.M263I  | 22 | exon11 | 19883090 | c.789G>T  | 0.26 | 0.067 |
| TXNRD2  | Q9NNW7 | p.V162F  | 22 | exon6  | 19903332 | c.484G>T  | 0.01 | 0     |
| UNKL    | Q9H9P5 | p.G443C  | 16 | exon11 | 1421541  | c.1327G>T | 0.07 |       |

|        |        |          |    |        |          |            |      |       |
|--------|--------|----------|----|--------|----------|------------|------|-------|
| VANGL1 | Q8TAA9 | p.S336X  | 1  | exon6  | 1.16E+08 | c.1007C>A  | 0.01 | 0.735 |
| VEGF   | P15692 | p.H218Q  | 6  | exon2  | 43742125 | c.654C>A   | 0.08 | 0.831 |
| VPS13D | Q5THJ4 | p.T3861N | 1  | exon60 | 12460260 | c.11582C>A | 0.05 | 0.453 |
| VPS37A | Q8NEZ2 | p.A386E  | 8  | exon11 | 17143899 | c.1157C>A  | 0.04 | 0.004 |
| ZBTB45 | Q96K62 | p.T138P  | 19 | exon2  | 59028629 | c.412A>C   | 0.96 | 0     |
| ZFP1   | Q6P2D0 | p.E297K  | 16 | exon4  | 75203897 | c.889G>A   | 0.29 | 0.956 |
| ZNF141 | Q15928 | p.E315K  | 4  | exon4  | 367169   | c.943G>A   | 0.06 | 0.13  |
| ZNF410 | Q86VK4 | p.A90S   | 14 | exon5  | 74363066 | c.268G>T   | 0    | 0.001 |
| ZNHIT1 | O43257 | p.R114C  | 7  | exon4  | 1.01E+08 | c.340C>T   | 0    | 1     |
| ZP3    | P21754 | p.H287R  | 7  | exon8  | 76069881 | c.860A>G   | 0.15 | 0.046 |

---

## **Extended Experimental Procedures**

### **Patient specimen acquisition**

The study was examined and approved by the Ethics Committee of the Shanghai Tenth People's Hospital, Tongji University School of Medicine (SHSY-IEC-PAP-16-24). This study was registered with ClinicalTrials.gov, number NCT02917707. Follow-up data and statistics were recorded for all patients through Dec. 31, 2017.

### **DNA and RNA extraction.**

Using a co-isolation protocol, DNA and RNA were purified simultaneously using the QIAGEN All Prep DNA/RNA Micro Kit (Qiagen, CA, USA) according to the manufacturer's instructions [1]. The nucleic acid concentration was determined using a Nanodrop1000 spectrophotometer (Thermo Fisher Scientific; Waltham, MA, USA) [2], and the RNA purity was verified using 1.5% denaturing agarose gels.

### **Protein extraction and analysis by LC-MS/MS.**

Forty four paired fresh primary tumors from the colorectal and paired normal colorectal tissues (PN) independently confirmed by two experienced pathologists Z.Y.C. and H.Q.Y., were used for proteogenomic analysis (Table S1). Three different parts of the same lesions for every sample were compared for data analysis and measurement of the variation caused by random biological effects. The tissues were homogenized in 4 % SDS and 0.1 M DTT in 0.1 M Tris-HCl, pH 7.6 on ice, sonicated 10 times (80 w; 10 s sonication/5 s suspension), incubated for 3 min at 95 °C, and briefly sonicated. The protein concentrations of clarified lysates were determined using a fluorescence assay and then 200 µg of clarified lysates were proteolyzed on a 10 kDa filter (PALL Life Sciences, Shanghai, China) using the filter-aided sample preparation method [3]. The peptide samples were then desalted onto a solid-phase extraction cartridge. The lyophilized peptide mixture was re-suspended in water with 0.1% formic acid (v/v), and its content was estimated by ultraviolet light spectral density at 280 nm [4]. Then, 3 µg of the digest sample was analyzed by

nano-liquid chromatography-tandem mass spectrometry on a LTQ Orbitrap Velos Pro mass spectrometer as previously described [5].

The acquired data from mass spectrometry runs were combined and searched against the UniProt Human database (05/2016, 153652 entries) using Maxquant software (version 1.3.0.5; <http://maxquant.org/>) as described [6]. Proteins were identified using the Andromeda peptide search engine integrated into the Maxquant platform [7]. The required minimum peptide length for identification was 7 amino acids, and the false discovery rate at the protein level, peptide level and site were set to 0.01. The normalized spectral protein intensity values were calculated for each protein group.

The Maxquant peptide and protein quantification results files were imported into Perseus software (version 1.5.1.6) to identify the differentially expressed proteins [8-10]. After importing the quantitative data from ProteinGroups.txt into Perseus, a filtering criterion is set to keep the identified proteins with the quantified values of all ten reporter ions (no missing value) in the final identification list. The protein intensities are  $\log_2$ -transformed and normalized by subtracting the median intensity in each column/sample. Principal component analysis (PCA) is performed based on protein intensities to differentiate groups [11]. Two-samples t-tests coupled with Benjamini–Hochberg (FDR cutoff of 0.05) correction are performed to identify the differentially expressed proteins [12].

### **Validation of point mutations by PCR and Sanger sequencing.**

The reliability of the exome analysis and somatic variant identification strategies was assessed using PCR and Sanger sequencing. PCR was performed using the GeneAmp PCR System 9700 (Applied Biosystems, Foster City, CA, USA). About 20 ng template DNA from each sample was used per reaction. The products were sequenced, and all sequences were analyzed with the Sequencing Analysis Software Version 5.2 (Applied Biosystems) [13].

### **RNA sequencing analysis.**

Of the 44 samples described in this study, 9 specimens from 3 CRC patients with metastasis (comprised of triplet sets of PN, primary MT, and synchronously matched liver metastases sample) and 3 specimens from 3 CRC patients without liver metastasis were obtained for RNA sequencing analysis. The mRNA libraries were separately generated from total RNA and constructed according to the standard Illumina RNA library preparation protocol (Illumina Inc, USA) [14]. Sequencing was performed on the Illumina Nextseq 500 platform according to the manufacturer's instructions [15]. Images generated by Nextseq 500 were converted into nucleotide sequences using a base call pipeline and stored in FASTQ format, and the raw reads were filtered prior to analyzing the data [16]. Clean reads were mapped to reference Homo sapiens transcriptome sequences from the UCSC website (hg19) using Bowtie 2 and Tophat 2.0.1 software [17-19].

To annotate gene expression, reads per kilobases per million read values of each gene were calculated, and differentially expressed genes were extracted using this value. The formula for calculating these values was defined as: reads per kilobases per million read values = total exon reads / (mapped reads [millions] × exon length [kbp]). RNA-Seq generated from 7,256,241 to 368,134,260 reads that were aligned to the human reference GRCh37.p5/hg19, representing an average genome-coverage of 105x.

### **Hierarchical clustering, Gene Ontology (GO) and Kyoto Encyclopedia of Genes and Genomes (KEGG) pathway analysis.**

Hierarchical clustering was performed using MEV software (<http://mev.tm4.org/>, v4.7.0, TIGR) [20]. The matrix was presented graphically by colouring each expression result on the basis of measured colour range: lower limit '0.0' was coloured green, upper limit '369.5' was coloured red and midpoint value '37.5' was coloured black. Pearson correlation was used as distance metric and the complete linkage method was used.

To identify genes/proteins that are specifically dysregulated in CLM, we fixed the cutoff at 2-fold with a P value less than 0.05 with a FDR q-value < 0.05. Dysregulated genes/proteins were



subjected to GO analysis and KEGG pathway analysis by DAVID (<http://david.ncifcrf.gov>) and STRING (<https://string-db.org/>) online analysis software [21-23].

### **TCGA data acquisition and processing.**

We downloaded RNA-sequencing data from 379 CRC patients from TCGA portal (<https://cancergenome.nih.gov/>), 12 of which had liver metastasis at the time of diagnosis or during the five-year follow-up period, and 367 of which had CRC without metastasis to the liver. The mRNA expression levels were investigated in 379 CRC tissues and 32 PN tissues in TCGA datasets by Illumina HiSeq 2000 RNA Sequencing Version 2 analysis and normalized by the RSEM algorithm. Whole-exome sequencing mutation datasets were downloaded from TCGA data set to create a customized CRC mutation database. The clinical information recorded, including the patient's characteristics, tumor characteristics, and overall and progression-free survival was assessed.

### **Cell lines and transfection**

Human CRC cell line SW480 were purchased from the Cell Bank of the Chinese Academy of Sciences (Shanghai, China) and cultured in DMEM media (Invitrogen, Carlsbad, USA) and supplemented with 10 % (v/v) fetal bovine serum, 100 U/ml penicillin, and 100 mg/ml streptomycin. SW480 cell lines were routinely tested for mycoplasma contamination, and have been authenticated with short-tandem repeat analysis. Cell culture was conducted at 37 °C in a humidified 5% CO<sub>2</sub> incubator.

*FDFT1* shRNA sequences were cloned into the plvx-shRNA plasmid. The non-silencing lentiviral shRNA vector was used as a control. The lentivirus was packaged using psPAX2 and pMD2G, a three-plasmid system. To obtain stable cell lines, lentivirus supernatant was added to SW480 cells, followed by screening with 1 µg/ml puromycin for 2 weeks. For UQCR5 over-expression, the human full length *UQCR5* cDNA was cloned into the pMSCV-hygro vector. The SW480 cells with stable over-expression of UQCR5 were polyclonal derivatives with

hygromycin selection to avoid clonal variations in functional assays.

### **Scratch-Wound Assay**

The human CRC SW480 cells were conducted at 37 °C in a humidified 5% CO<sub>2</sub> incubator and cells were grown into confluency in 6-well plates. The monolayer was artificially injured by scratching across the plate with a 200 µl pipette tip. The wells were washed 3 times to remove detached cells or cell debris. After 12 hours, digital images were captured using a camera-equipped, inverted microscope (Carl Zeiss, Inc., Thorwood, NY, USA) and wound width measurements were subtracted from wound width at time zero to obtain the net wound closure.

### ***In vitro* invasion assays**

Corning Costar Transwell 24-well plates with 8-µm-pore-size polycarbonate membrane filters (Costar, Cambridge, MA) coated with BD Matrigel matrix (Becton Dickinson, Bedford, MA) were maintained for 1 h at 37 °C, followed by the addition of  $1 \times 10^5$  transfected cells suspended in 200 µl medium with 1% serum into the top of each well insert [24-26]. Normal growth medium was added to the bottom wells. The cells were allowed to migrate for 24 h at 37 °C. The migrated cells were fixed with 10% methanol for 15 min. The invading cells on the lower surface of the membrane were stained with 0.5% crystal violet for 5 min at room temperature. Random fields were photographed and the stained cells were counted under a microscope (Nikon Corporation).

### **Statistical analysis.**

Data were expressed as means  $\pm$  standard deviations. Categorical data were reported as numbers and percentages. F tests were used to assess the equality of variances for comparable groups. Paired t test, One-way analysis of variance (ANOVA), Kruskal-Wallis test, and  $\chi^2$  tests were used to analyze mRNA expression. For time-to-event analyses, survival estimates were calculated by the Kaplan-Meier analysis, and groups were compared with the log-rank test. Clinical variables that were considered for single variable analyses were previously identified as confounding variables with impact on the prognosis of patients with colorectal cancer. The

Spearman's correlation coefficient was used to test the relationship of two independent groups. To identify genes/proteins that are specifically dysregulated in CLM, we fixed the cutoff at 2-fold with a P value less than 0.05 with a FDR q-value < 0.05. All calculations were performed with SPSS 20.0 software (SPSS Inc, Chicago, IL, USA).

### Supplementary References

1. Ma Y.S., Wu Z.J., Bai R.Z., Dong H., Xie B.X., Wu X.H., Hang X.S., Liu A.N., Jiang X.H., Wang G.R., Jiang J.J., Xu W.H., Chen X.P., Tan G.H., Fu D., Liu J.B., Liu Q. DRR1 promotes glioblastoma cell invasion and epithelial-mesenchymal transition via regulating AKT activation. *Cancer Lett.* 2018;423:86-94.
2. Xie R.T., Cong X.L., Zhong X.M., Luo P., Yang H.Q., Lu G.X., Luo P., Chang Z.Y., Sun R., Wu T.M., Lv Z.W., Fu D., Ma Y.S. MicroRNA-33a downregulation is associated with tumorigenesis and poor prognosis in patients with hepatocellular carcinoma. *Oncol. Lett.* 2018;154571-4577.
3. Neilson K.A., Ali N.A., Muralidharan S., Mirzaei M., Mariani M., Assadourian G., Lee A., van Sluyter S.C., Haynes P.A. Less label, more free: approaches in label-free quantitative mass spectrometry. *Proteomics.* 2011;11:535-553.
4. Bouckaert R.R., Drummond A.J. bModelTest: Bayesian phylogenetic site model averaging and model comparison. *BMC Evol. Biol.* 2017;17:42.
5. Polisetty R.V., Gautam P., Sharma R., Harsha H.C., Nair S.C., Gupta M.K., Uppin M.S., Challa S., Puligopu A.K., Ankathi P., Purohit A.K., Chandak G.R., Pandey A., Sirdeshmukh R. LC-MS/MS analysis of differentially expressed glioblastoma membrane proteome reveals altered calcium signaling and other protein groups of regulatory functions. *Mol. Cell. Proteomics.* 2012;11: M111.013565.

6. Lubber C.A., Cox J., Lauterbach H., Fancke B., Selbach M., Tschopp J., Akira S., Wiegand M., Hochrein H., O'Keeffe M., Mann M. Quantitative proteomics reveals subset-specific viral recognition in dendritic cells. *Immunity*. 2010;32: 279-289.
7. Ma Y.S., Huang T., Zhong X.M., Zhang H.W., Cong X.L., Xu H., Lu G.X., Yu F., Xue S.B., Lv Z.W., Fu D. Proteogenomic characterization and comprehensive integrative genomic analysis of human colorectal cancer liver metastasis. *Mol. Cancer*. 2018;17:139.
8. Imperial R., Ahmed Z., Toor O.M., Erdoğan C., Khaliq A., Case P., Case J., Kennedy K., Cummings L.S., Melton N., Raza S., Diri B., Mohammad R., El-Rayes B., Pluard T., Hussain A., Subramanian J., Masood A. Comparative proteogenomic analysis of right-sided colon cancer, left-sided colon cancer and rectal cancer reveals distinct mutational profiles. *Mol. Cancer*. 2018;17:177.
9. Lim S.Y., Lee J.H., Diefenbach R.J., Kefford R.F., Rizos H. Liquid biomarkers in melanoma: detection and discovery. *Mol. Cancer*. 2018;17:8.
10. Monteleone F., Taverna S., Alessandro R., Fontana S. SWATH-MS based quantitative proteomics analysis reveals that curcumin alters the metabolic enzyme profile of CML cells by affecting the activity of miR-22/IPO7/HIF-1 $\alpha$  axis. *J. Exp. Clin. Cancer Res*. 2018;37:170.
11. Antoury L., Hu N., Balaj L., Das S., Georghiou S., Darras B., Clark T., Breakefield X.O., Wheeler T.M. Analysis of extracellular mRNA in human urine reveals splice variant biomarkers of muscular dystrophies. *Nat. Commun*. 2018;9:3906.
12. Wu S., Ou T., Xing N., Lu J., Wan S., Wang C., Zhang X., Yang F., Huang Y., Cai Z. Whole-genome sequencing identifies ADGRG6 enhancer mutations and FRS2 duplications as angiogenesis-related drivers in bladder cancer. *Nat. Commun*. 2019;10:720.
13. Downes N.L., Laham-Karam N., Kaikkonen M.U., Ylä-Herttuala S. Differential but complementary HIF1 $\alpha$  and HIF2 $\alpha$  transcriptional regulation. *Mol. Ther*. 2018;26:1735-1745.

14. Chen H., Pan H., Qian Y., Zhou W., Liu X. MiR-25-3p promotes the proliferation of triple negative breast cancer by targeting BTG2. *Mol. Cancer*. 2018;17:4.
15. Xing F., Wang S., Zhou J. The expression of MicroRNA-598 inhibits ovarian cancer cell proliferation and metastasis by targeting URI. *Mol. Ther. Oncolytics*. 2019;12:9-15.
16. Li J., Song P., Jiang T., Dai D., Wang H., Sun J., Zhu L., Xu W., Feng L., Shin V.Y., Morrison H., Wang X., Jin H. Heat shock factor 1 epigenetically stimulates glutaminase-1-dependent mTOR activation to promote colorectal carcinogenesis. *Mol. Ther*. 2018;26:1828-1839.
17. Liu J.J., Zhang X., Wu X.H. miR-93 promotes the growth and invasion of prostate cancer by upregulating its target genes TGFBR2, ITGB8, and LATS2. *Mol. Ther. Oncolytics*. 2018;11:14-19.
18. Wang Q., Ju X., Wang J., Fan Y., Ren M., Zhang H. Immunogenic cell death in anticancer chemotherapy and its impact on clinical studies. *Cancer Lett*. 2018;438:17-23,
19. Ma Y.S., Lv Z.W., Yu F., Chang Z.Y., Cong X.L., Zhong X.M., Lu G.X., Zhu J., Fu D. MiRNA-302a/d inhibits the self-renewal capability and cell cycle entry of liver cancer stem cells by targeting the E2F7/AKT axis. *J. Exp. Clin. Cancer Res*. 2018;37(1):252.
20. Yang H., Li Y., Zhong X., Luo P., Luo P., Sun R., Xie R., Fu D., Ma Y., Cong X., Li W. Upregulation of microRNA-32 is associated with tumorigenesis and poor prognosis in patients with hepatocellular carcinoma. *Oncol. Lett*. 2018;15:4097-4104.
21. Lu H.M., Yi W.W., Ma Y.S., Wu W., Yu F., Fan H.W., Lv Z.W., Yang H.Q., Chang Z.Y., Zhang C., Xie W.T., Jiang J.J., Song Y.C., Chai L., Jia C.Y., Lu G.X., Zhong X.J., Hou L.K., Wu C.Y., Shi M.X., Liu J.B, Fu D. Prognostic implications of decreased microRNA-101-3p expression in patients with non-small cell lung cancer. *Oncol. Lett*. 2018;16:7048-7056.
22. Long H.D., Ma Y.S., Yang H.Q., Xue S.B., Liu J.B., Yu F., Lv Z.W., Li J.Y., Xie R.T., Chang Z.Y., Lu G.X., Xie W.T., Fu D., Pang L.J. Reduced hsa-miR-124-3p levels are associated with

the poor survival of patients with hepatocellular carcinoma. *Mol. Biol. Rep.*

2018;45:2615-2623.

23. Chen F., Long Q., Fu D., Zhu D., Ji Y., Han L., Zhang B., Xu Q., Liu B., Li Y., Wu S., Yang C.,

Qian M., Xu J., Liu S., Cao L., Chin Y.E., Lam E.W., Coppé J.P., Sun Y. Targeting SPINK1 in

the damaged tumour microenvironment alleviates therapeutic resistance. *Nat. Commun.*

2018;9:4315.

24. Wang Z.Y., Hu M., Dai M.H., Xiong J., Zhang S., Wu H.J., Zhang S.S., Gong Z.J.

Upregulation of the long non-coding RNA AFAP1-AS1 affects the proliferation, invasion and

survival of tongue squamous cell carcinoma via the Wnt/ $\beta$ -catenin signaling pathway. *Mol.*

*Cancer.* 2018;17:3.

25. Sun M., Nie F.Q., Zang C., Wang Y., Hou J., Wei C., Li W., He X., Lu K.H. The Pseudogene

DUXAP8 promotes non-small-cell lung cancer cell proliferation and invasion by

epigenetically silencing EGR1 and RHOB. *Mol. Ther.* 2017;25:739-751.

26. Bialk P., Wang Y., Banas K., Kmiec E.B. Functional gene knockout of NRF2 increases

chemosensitivity of human lung cancer A549 cells in vitro and in a xenograft mouse model.

*Mol. Ther. Oncolytics.* 2018;11:75-89.
