# Supplementary material for: Dual Regulatory Mechanisms of Expression and Mutation Involving Metabolism-Related Genes FDFT1 and UQCR5 during CLM
Source: PubMed Central journal article supplement — Mol Ther Oncolytics. 2019 May 22;14:172–8. doi: 10.1016/j.omto.2019.04.008 (PMC6579909; doi:10.1016/j.omto.2019.04.008), 2019-05-22
Supplement: mmc2.pdf [file mmc2.pdf]

# Dual Regulatory Mechanisms of Expression and Mutation Involving Metabolism-Related Genes FDFT1 and UQCR5 during CLM

Yu-Shui Ma,<sup>1,2,3,11</sup> Zhi-Jun Wu,<sup>1,11</sup> Hong-Wei Zhang,<sup>4,11</sup> Bo Cai,<sup>5,11</sup> Tao Huang,<sup>6</sup> Hui-Deng Long,<sup>2</sup> Hong Xu,<sup>7</sup> Yong-Zhong Zhao,<sup>8</sup> Yu-Zhen Yin,<sup>2</sup> Shao-Bo Xue,<sup>2</sup> Liu Li,<sup>2</sup> Cheng-Lin Liu,<sup>9</sup> Ru-Ting Xie,<sup>2</sup> Lin-Lin Tian,<sup>2</sup> Ji-Bin Liu,<sup>10</sup> Xu-Ming Wu,<sup>5</sup> and Da Fu<sup>2</sup>

<sup>1</sup>Department of Radiotherapy, Nantong Tumor Hospital, Nantong 226631, China; <sup>2</sup>Central Laboratory for Medical Research, Shanghai Tenth People's Hospital, Tongji University School of Medicine, Shanghai 200072, China; <sup>3</sup>Shanghai Engineering Research Center of Molecular Therapeutics and New Drug Development, College of Chemistry and Molecular Engineering, East China Normal University, Shanghai 200062, China; <sup>4</sup>Analytical Chemistry Platforms, Shanghai Institute for Advanced Immunochemical Studies, ShanghaiTech University, Shanghai 201210, China; <sup>5</sup>Department of Chronic Diseases, Nantong Center for Disease Control and Prevention, Nantong 226007, China; <sup>6</sup>Institute of Health Sciences, Shanghai Institutes for Biological Sciences, Chinese Academy of Sciences, Shanghai 200025, China; <sup>7</sup>Department of Gastroenterology and Hepatology, Hangzhou Red Cross Hospital, Hangzhou 310003, China; <sup>8</sup>Department of Medical Genetics, Southern Medical University, Guangzhou 510515, China; <sup>9</sup>School of Life Sciences and Biotechnology, Shanghai Jiao Tong University, Shanghai 200240, China; <sup>10</sup>Cancer Institute, Nantong Tumor Hospital, Nantong 226631, China

**Colorectal cancer (CRC) is the third most common cancer worldwide, and liver metastasis presents a major cause of CRC-associated death. Extensive genomic analysis has provided valuable insight into the pathogenesis and progression of CRC; however, a comprehensive proteogenomic characterization of CRC liver metastasis (CLM) has yet to be reported. Here, we analyzed the proteomes of 44 paired normal colorectal tissues and CRC tissues with or without liver metastasis, as well as analyzed genomics of CRC characterized previously by The Cancer Genome Atlas (TCGA) to conduct integrated proteogenomic analyses. We identified a total of 2,170 significantly downregulated proteins associated with CLM, 14.88% of which were involved in metabolic pathways. The mutated peptide number was found to have potential prognosis value, and somatic variants revealed two metabolism-related genes UQCR5 and FDFT1 that frequently mutated only in the liver metastatic cohort and displayed dysregulated protein abundance with biological function and clinical significance in CLM. Proteogenomic characterization and integrative and comparative genomic analysis provides functional context and prognostic value to annotate genomic abnormalities and affords a new paradigm for understanding human colon and rectal cancer liver metastasis.**

## INTRODUCTION

Colorectal cancer (CRC) is a significant contributor of cancer morbidity and mortality.<sup>1-3</sup> Almost half of CRC patients die within 5 years of diagnosis due to the development of recurrent disease and metastasis.<sup>4-8</sup> Therefore, it is important to illuminate the molecular basis of CRC liver metastasis (CLM) in hopes of developing new effective treatment modalities. The Cancer Genome Atlas (TCGA) has characterized the genomic features of many types of human can-

cers, including CRC,<sup>9-11</sup> and the Clinical Proteomic Tumor Analysis Consortium has also performed CRC-integrated proteomic analyses.<sup>12-15</sup> However, the primary genetic basis of CLM has not been fully elucidated. Understanding the genetic and proteogenomic differences between primary colon cancer and associated metastases to the liver is essential for discovering metastasis-specific molecular biomarkers and for devising a better therapeutic approach for this disease.

## RESULTS AND DISCUSSION

To identify protein variants associated with CLM, we collected tumor samples and paired normal colorectal tissues (PNs) from 44 CRC tumor samples with (MT, n = 23) or without liver metastasis (NM, n = 21) in comparison with PNs (Table S1) to perform liquid chromatography-tandem mass spectrometry (LC-MS/MS)-based shotgun proteomics profiling (Figure S1). A total of 12,177,738 spectra were used in the Andromeda engine search, and 63,720 unique peptides were identified in an assembly of 5,758 protein groups with a protein-level false discovery rate (FDR) of 1.0%. Ingenuity pathway analysis with all 5,758 identified proteins showed that about 55% of the

Received 3 January 2019; accepted 30 April 2019;  
<https://doi.org/10.1016/j.omto.2019.04.008>.

<sup>11</sup>These authors contributed equally to this work.

**Correspondence:** Ji-Bin Liu, Cancer Institute, Nantong Tumor Hospital, Nantong 226631, China.

**E-mail:** [tians2008@163.com](mailto:tians2008@163.com)

**Correspondence:** Xu-Ming Wu, Department of Chronic Diseases, Nantong Center for Disease Control and Prevention, Nantong 226007, China.

**E-mail:** [ntzlyyywk@163.com](mailto:ntzlyyywk@163.com)

**Correspondence:** Da Fu, Central Laboratory for Medical Research, Shanghai Tenth People's Hospital, Tongji University School of Medicine, Shanghai 200072, China.

**E-mail:** [fu800da900@126.com](mailto:fu800da900@126.com)

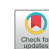

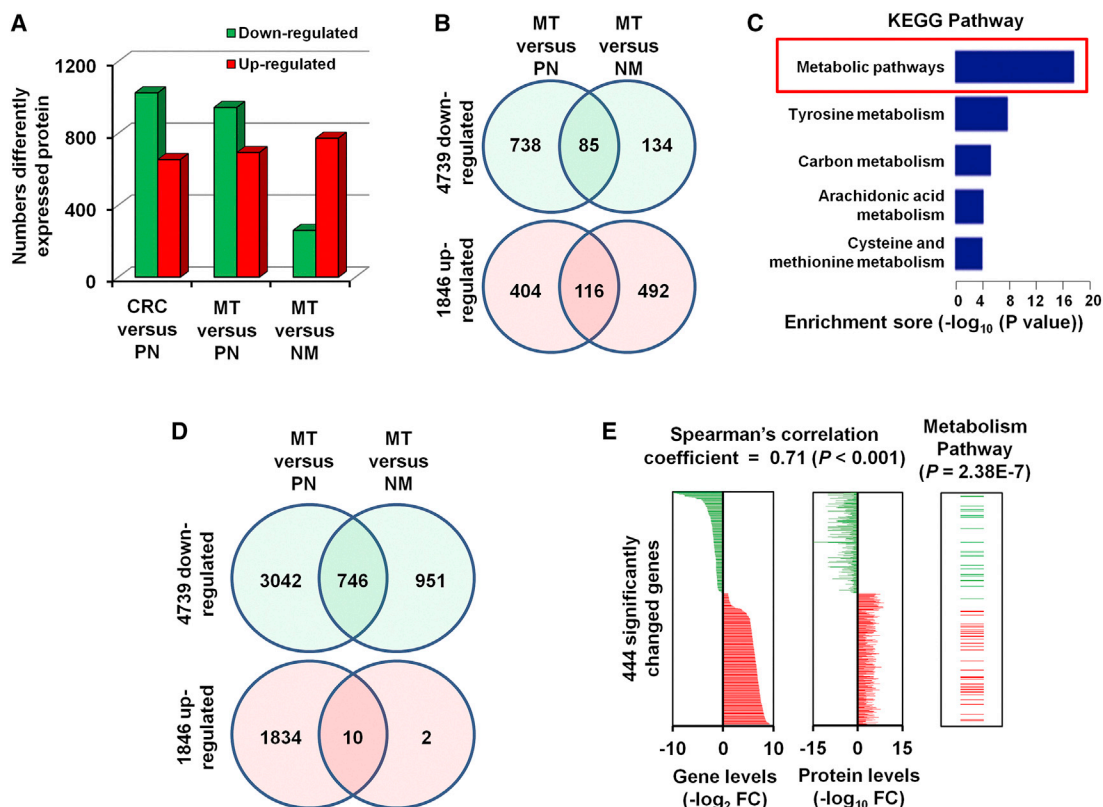

**Figure 1. Differently Expressed Protein and mRNA-Protein Correlation Analysis**

(A) Numbers of differently expressed proteins ( $\geq 2$ -fold difference;  $p < 0.05$  with a FDR  $q$  value  $< 0.05$ ) between the 44 CRC and paired PN samples, and the 23 MT and 21 NM samples. (B) Significantly changed proteins among three groups from LC-MS/MS data. (C) KEGG pathway analysis of the 2,170 differentially expressed proteins. (D) Significantly changed genes among three groups from RNA-sequencing data. (E) 444 significantly changed genes showed significant mRNA-protein correlation, with a mean Spearman's correlation coefficient of 0.71. Among these, 57 genes were enriched in metabolism pathways.

proteins were from the cytoplasm, 28% were from the nucleus, 7% were from the plasma membrane, and 2% were from the extracellular space, whereas 8% of proteins remained unclassified (Figure S2A). The random predicted cellular distribution of the proteins supports the quality of the sample preparation. A scatterplot of protein abundance between CRC tissues and PNs showed that there was a great variation between the NM or MT tumors and PN (Figures S2B and S2C). However, the protein expression between the MT and NM group was positively correlated ( $R^2 = 0.86$ ) (Figure S2D). These results suggest that metastatic and non-metastatic CRCs share similar protein profiles and that there are common molecular alterations at each stage of tumor development.<sup>16–18</sup>

Among the 5,758 proteins, a total of 1,679 proteins were significantly altered between CRC tissue and normal colorectal tissues (Figure 1A, left bars). There were 2,170 proteins with significant differences in MT tissues when compared with PNs or NM tissues (Figures 1A, middle and right bars, and 1B). To explore the functions of proteins that are dysregulated in CLM, we used DAVID (Database for Annotation, Visualization and Integrated Discovery) analysis software to classify the gene ontology of the 2,170 significantly altered proteins in MT

tissues<sup>19</sup> (Figures S3A–S3C). Kyoto Encyclopedia of Genes and Genomes (KEGG) analysis of differentially expressed proteins<sup>20</sup> revealed that metabolic pathways were altered in the MT samples, with 323 significantly differentially expressed proteins (14.88%) involved in metabolic pathways (Figure S3D), which suggests that metabolism-related pathways may play important roles in the liver metastasis of CRC.<sup>21–24</sup>

We performed unsupervised hierarchical clustering of the expression data from RNA-sequencing data to evaluate the genetic diversity between the primary and metastatic CRCs, based on the assumption that genetically similar CRCs and their matched metastatic foci would be closely related.<sup>25–27</sup> As expected, the results showed that the MT and LM tissues had closely related expression profiles, indicating clonal and genetic similarity for these pairs. However, the NM samples were more distantly related, suggesting distinct genetic relationships between patients with and without metastasis (Figure S4A). A total of 2,299 genes from the RNA-sequencing were significantly changed in CLM (Figure S4B). KEGG pathway classification enrichment analysis indicated that 915 genes (39.8%) were enriched in metabolism pathways (Figure 1C), which was similar to the findings

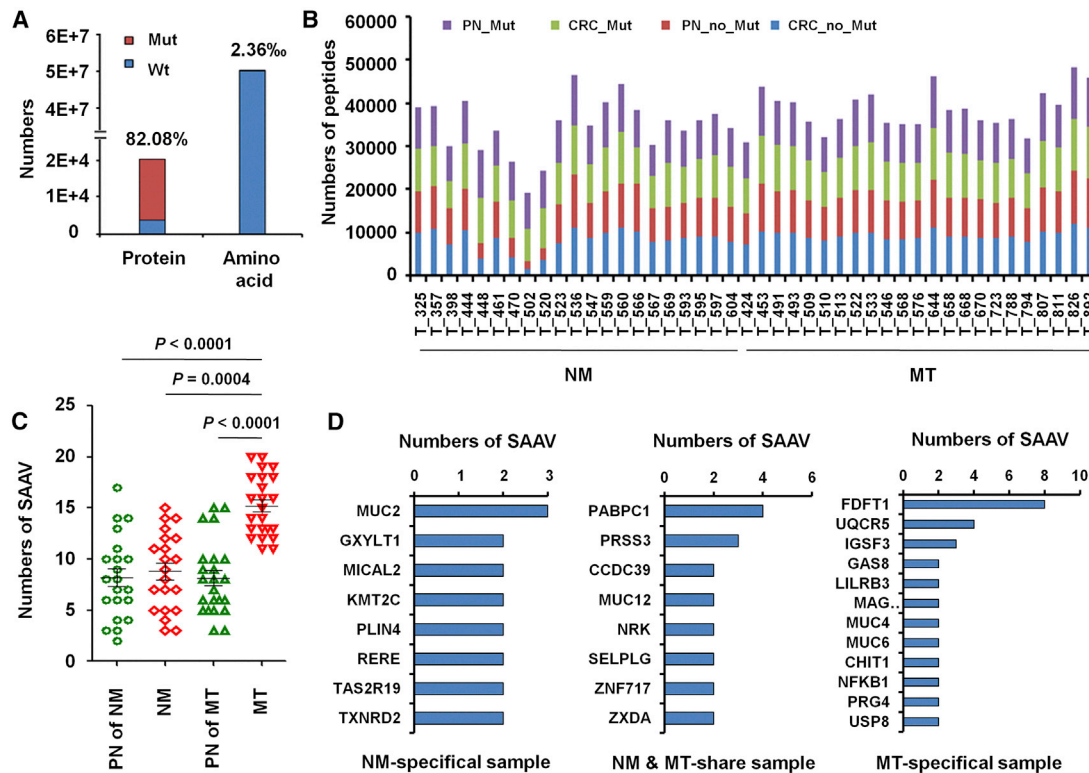

**Figure 2. Numbers of SAAVs in Paired PN, NM, or MT Samples**

(A) The proportion of mutated proteins and amino acids in CRC samples were calculated by comparing LC-MS/MS data for the standard protein library and SAAV library. (B) The mutated and non-mutated peptides numbers of 44 paired CRC tissues. (C) Numbers of SAAVs in 21 NM, 23 MT, and their PNs. (D) Numbers of NM-specific, MT-specific, and NM- and MT-shared SAAVs. The mutated peptides were identified by comparing LC-MS/MS data for the standard protein library and SAAV library.

of the protein analysis (Figure S3D). These results provide additional confirmation that metabolism pathways may play a role in the carcinogenesis and development of CRC.<sup>28</sup>

For further confirmation of these results, we analyzed RNA-sequencing data from TCGA portal. A total of 6,585 significantly changed genes in CRC tissues were identified (Figure 1D). When compared with the 2,170 significantly changed CLM-associated proteins identified by LC-MS/MS, 444 significantly changed genes showed significant positive mRNA-protein correlation (Figure 1E, left two panels). To determine whether the concordance between protein and mRNA variation is related to the biological function of the gene product, we performed KEGG enrichment analysis, which indicated that among the 444 significantly deregulated genes or proteins, 57 are enriched in metabolic pathways ( $p = 2.38E-7$ ) (Figure 1E, right panel). These findings further verify the role of metabolic pathway genes in CLM.

To examine the clinical significance of our findings, we evaluated the clinical characters data of 374 CRC patients from TCGA database for the 444 significantly deregulated genes or proteins (Table S2). Our results showed that 17 dysregulated genes were significantly associated with overall survival (OS) and progression-free survival (PFS) of CRC

patients. Among them, high expression of four upregulated genes, *BGN*, *EHD2*, *UQCR5*, or *COL1A2*, was associated with poor survival of CRC patients.<sup>29–32</sup> Furthermore, high expression of *FDFT1* significantly prolongs the OS and PFS of CRC patients relative to low expression of *FDFT1* (Table S3).

A fundamental goal of proteogenomics is to identify protein-coding alterations that are expressed at the protein level.<sup>33–35</sup> However, standard database search approaches cannot identify variant peptides from MS/MS data.<sup>36–38</sup> Therefore, we created a customized mutation database to search for single amino acid variants (SAAVs) in CRC. A SAAV library was prepared using 113,844 mutated sites in CRC tissues from cBioport, and 16,581 mutated proteins were identified, which constitutes 82.08% of 20,201 proteins in the human protein library (Figure 2A). We determined the total numbers of mutated and non-mutated peptides and tumor-specific mutant peptides (Figure 2B) and found that mutated peptide numbers in MT samples were significantly increased (Figure 2C), which indicates that the mutated peptide number has potential predictive value for CLM.

Among those, 140 SAAVs in 131 proteins occurred only in NM patients (Figure 2D; Table S4), and 223 proteins in 18 MT patients



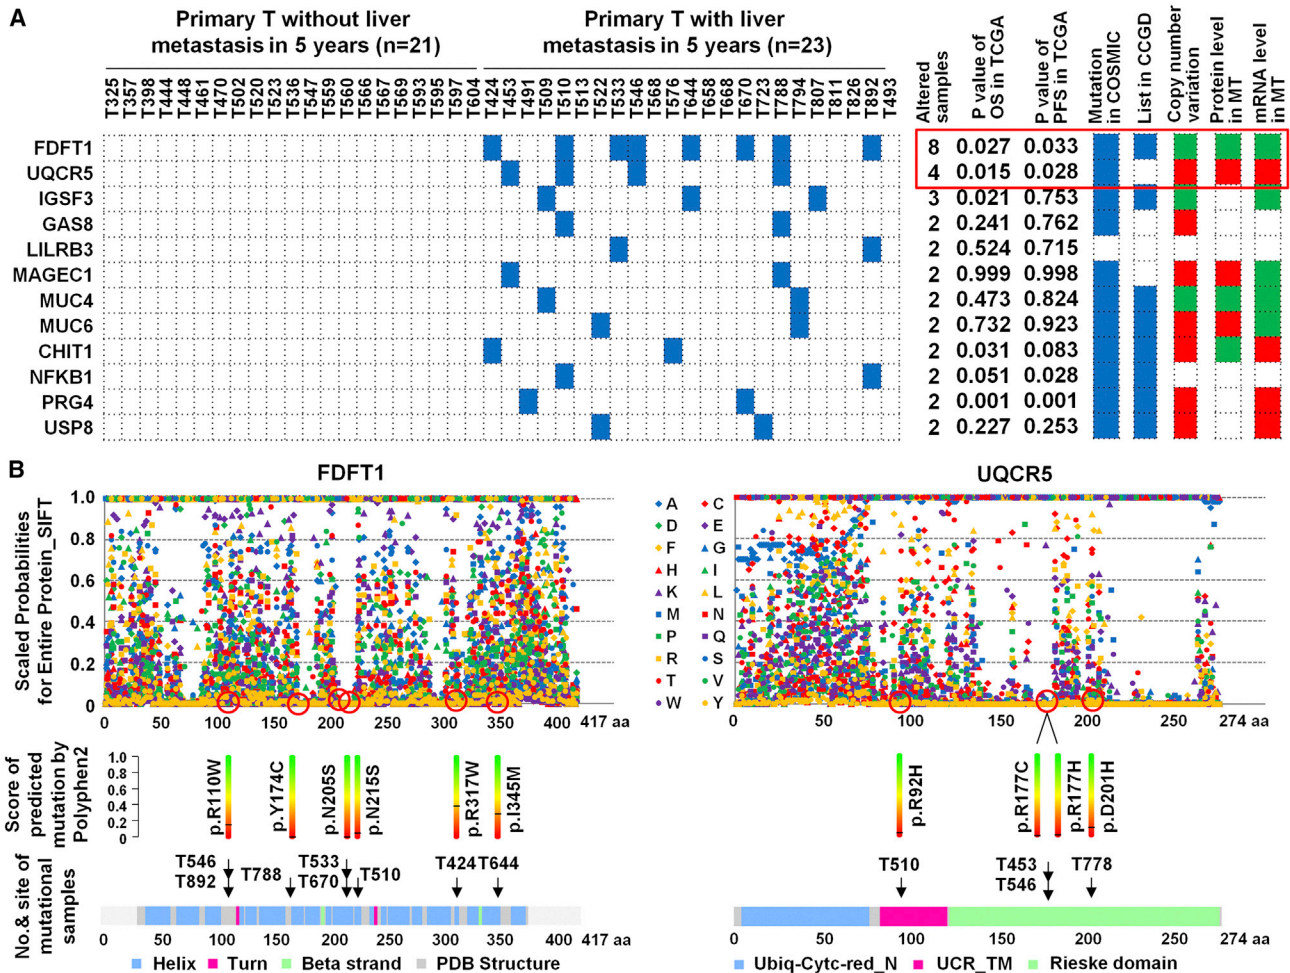

**Figure 3. The Frequency and Distribution of Mutational Proteins Specifically Altered in MT for 44 CRC**

(A) Heatmap comparing the frequency and distribution of 12 mutational proteins in 44 CRC (including 23 MT and 21 NM). Red, amplification or high expression; green, deletion or low expression. (B) Scaled probabilities for entire protein score of predicted mutation using SIFT and PolyPhen2 for FDFT1 and UQCR5 mutations.

had 256 SAAVs, of which 110 SAAVs in 100 proteins occurred in both NM and MT samples (Figure 2D; Table S5), and 203 SAAVs in 184 proteins only occurred in MT samples (Figure 2D; Table S6). Similarly to single nucleotide variants (SNVs), some mutations reported previously, such as those in TP53, antigen-presenting cells (APCs), vascular endothelial growth factor (VEGF), and SMAD4 were found.<sup>39–43</sup> Among these, two mRNA-protein positively changed and metabolism-related proteins, FDFT1, a 47-kDa membrane-associated enzyme located at a branch point in the mevalonate pathway involved in the replication stage of the hepatitis virus C (HCV) life cycle<sup>44</sup> and paclitaxel sensitivity in hypopharynx cancer cell,<sup>45</sup> and UQCR5, a component of the ubiquinol-cytochrome *c* reductase complex, amplifying in primary breast cancer core biopsy samples<sup>46–48</sup> and overexpressing in gastric cancer,<sup>49</sup> were found to be an occurrence of somatic alterations, which was validated with Sanger sequencing, in the 18.2% (8/44) and 9.1% (4/44) of CRC, and are specific to CLM

(Figure 3A). Mutation in FDFT1 was predicted to lose the function; however, mutation in UQCR5 was predicted to gain the function, and increased copy number enhanced UQCR5 gene expression and lead to increased protein expression when scale-invariant feature transform (SIFT) and PolyPhen2 were used for predicted function of FDFT1 and UQCR5 mutations (Figure 3B).

Moreover, FDFT1 knockdown (Figures S5A and S5B) or UQCR5 overexpression (Figures S5C and S5D) led to a significant increase of migrated distance (Figure 4A) and an obvious increase in matrix invasion (Figure 4B). FDFT1 was found to downregulate in CRC tissues when compared with normal colorectal tissues (Figure 4C). Determination of UQCR5 gene expression identified overexpression (Figure 4D) and negatively correlated with FDFT1 expression in normal colorectal tissues and CRC tissues (Figure 4E).

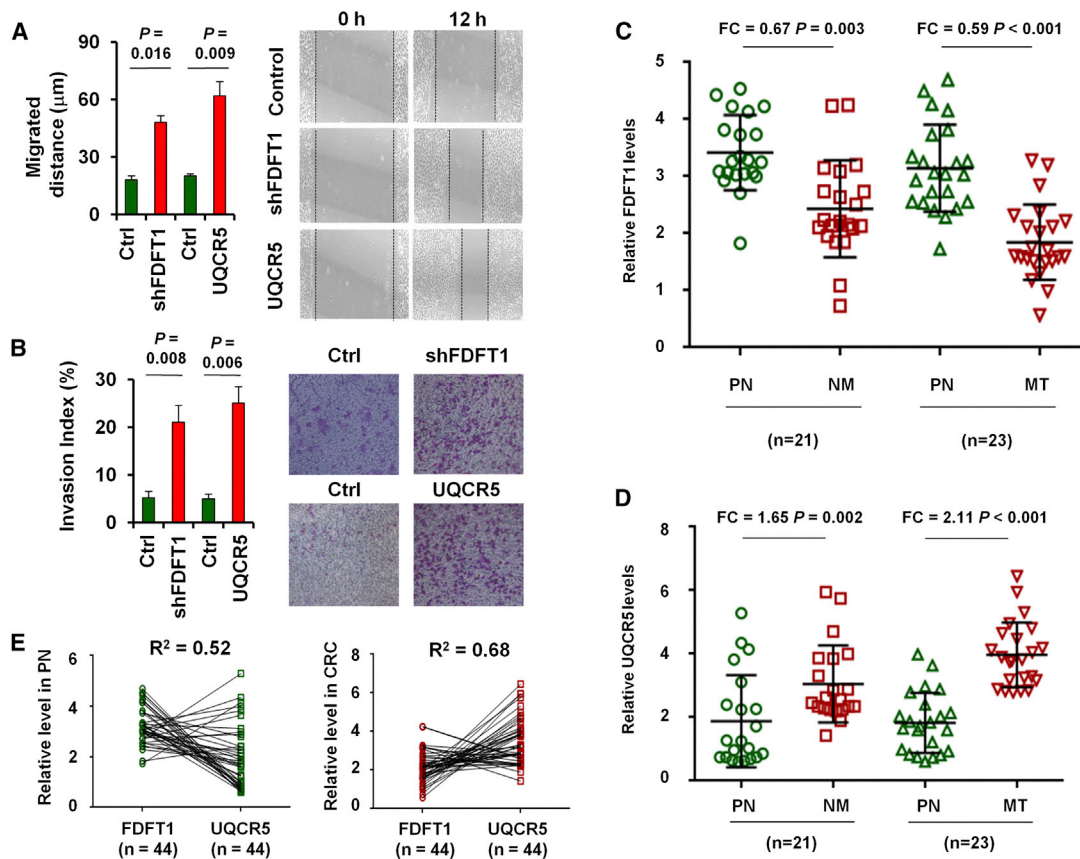

**Figure 4. The Biological Function and Clinical Significance of FDFT1 and UQCR5 in CRC**

Wound-healing assay (A) and migration abilities (B) of the parental and shFDFT1 or UQCR5 overexpressed SW480 cells. LC-MS/MS to quantify FDFT1 (C) and UQCR5 (D) levels in 44 paired CRC (including 23 MT and 21 NM) and normal colorectal tissues. (E) The expression correlation between FDFT1 and UQCR5 expression levels in 44 adjacently normal colorectal tissues or CRC tissues.

Patients with lower FDFT1 expression were found to have shorter median OS (Figures S6A and S7A) and PFS (Figures S6B and S7B), and high UQCR5 expression was an important risk factor for OS (Figure S6A and S7A) and PFS (Figures S6B and S7B). Moreover, concomitant low expression of FDFT1 and high expression of UQCR5 correlated with a shorter median OS (Figures S6A and S7A) and PFS (Figures S6B and S7B) in CRC patients. These studies provide direct evidence for contribution of metabolism-related genes.

To the best of our knowledge, this is the first comprehensive study to use proteogenomic profiling of primary CRCs from patients with or without liver metastasis to define the dominant events of metastatic lesions in terms of their expression and mutation. Our comprehensive integrative analysis of 44 colorectal tumors and normal pairs provides a number of insights into the biology of CLM and identifies potential therapeutic targets. Moreover, our characterization of the annotated metastatic CRC proteome clarifies the power of integrating genomics (SNVs) and proteomics (SAAVs). This approach provides new insights into the roles of these protein alterations in CLM, which can

be broadly extended to understand the roles of protein mutation in other cancers.

## MATERIALS AND METHODS

Details of sample preparation and analysis are described in the [Supplemental Materials and Methods](#). The study was examined and approved by the Ethics Committee of the Shanghai Tenth People's Hospital, Tongji University School of Medicine. This study was registered with ClinicalTrials.gov: NCT02917707). Forty-four paired fresh primary tumors from the colorectal and PNs were used for proteogenomic analysis. The reliability of the exome analysis and somatic variant identification strategies was assessed using PCR and Sanger sequencing. Nine specimens from three CRC patients with metastasis and three specimens from three CRC patients without liver metastasis were obtained for RNA-sequencing analysis. Human CRC cell line SW480 was used for scratch-wound and *in vitro* invasion assays. All calculations were performed with SPSS 20.0 software.

Whole-exome sequencing data from this study are available for download through NCBI Sequence Read Archive: PRJNA358865.

All RNA-sequencing data have been deposited in the Gene Expression Omnibus: GSE92914. All of the MS proteomics data have been deposited to iProX (<https://www.iprox.org/index>): IPX00083203 and IPX00083210.

#### SUPPLEMENTAL INFORMATION

Supplemental Information can be found online at <https://doi.org/10.1016/j.omto.2019.04.008>.

#### AUTHOR CONTRIBUTIONS

Y.-S.M., J.-B.L., X.-M.W., and D.F. designed and supervised the research and experiments. Y.-S.M., Z.-J.W., B.C., H.-W.Z., T.H., H.-D.L., H.X., Y.-Z.Z., Y.-Z.Y., R.-T.X., L.L.T., and D.F. analyzed the genetic data. Y.-S.M., Z.-J.W., B.C., H.-W.Z., T.H., S.-B.X., L.L., C.-L.L., J.-B.L., X.-M.W., and D.F. performed the proteogenomic experiments and analyzed the data. Y.-S.M., Z.-J.W., B.C., H.-W.Z., T.H., S.-B.X., L.L., R.-T.X., J.-B.L., and X.-M.W. performed tissue acquisition and clinical data collection. Y.-S.M., Z.-J.W., B.C., H.-W.Z., S.-B.X., L.L., R.-T.X., J.B.L., and D.F. performed functional validation experiments. All authors contributed to the final version of the manuscript.

#### CONFLICTS OF INTEREST

The authors declare no competing interests.

#### ACKNOWLEDGMENTS

We would like to thank Dr. Wei Zhang for data analysis and critical discussion of the manuscript. This study was supported partly by grants from the National Natural Science Foundation of China (81772932, 81472202, 81201535, 81302065, 81671716, 81301993, 81702243, 81372175, and 81472209), The Fundamental Research Funds for the Central Universities (22120170212 and 22120170117), the Shanghai Natural Science Foundation (12ZR1436000 and 16ZR1428900), the Shanghai Municipal Commission of Health and Family Planning (201540228 and 201440398), the Construction of Clinical Medical Center for Tumor Biological Samples in Nantong (HS2016004), and the Jiangsu 333 Program (BRA2017205).

#### REFERENCES

- Laissue, P. (2019). The forkhead-box family of transcription factors: key molecular players in colorectal cancer pathogenesis. *Mol. Cancer* 18, 5.
- Cristóbal, I., Sanz-Alvarez, M., Torrejón, B., Santos, A., Luque, M., Rojo, F., and García-Foncillas, J. (2018). Potential therapeutic impact of miR-145 deregulation in colorectal cancer. *Mol. Ther.* 26, 1399–1400.
- Wang, X., Sun, D., Tai, J., Chen, S., Hong, S., and Wang, L. (2019). ZNF280A promotes proliferation and tumorigenicity via inactivating the hippo-signaling pathway in colorectal cancer. *Mol. Ther. Oncolytics* 12, 204–213.
- Li, X.N., Wang, Z.J., Ye, C.X., Zhao, B.C., Li, Z.L., and Yang, Y. (2018). RNA sequencing reveals the expression profiles of circRNA and indicates that circDDX17 acts as a tumor suppressor in colorectal cancer. *J. Exp. Clin. Cancer Res.* 37, 325.
- Zhu, Y., Wang, C., Becker, S.A., Hurst, K., Nogueira, L.M., Findlay, V.J., and Camp, E.R. (2018). miR-145 antagonizes SNAI1-mediated stemness and radiation resistance in colorectal cancer. *Mol. Ther.* 26, 744–754.

- Ibarrola-Villava, M., Cervantes, A., and Bardelli, A. (2018). Preclinical models for precision oncology. *Biochim Biophys Acta Rev Cancer* 1870, 239–246.
- O’Leary, M.P., Warner, S.G., Kim, S.J., Chaurasiya, S., Lu, J., Choi, A.H., Park, A.K., Woo, Y., Fong, Y., and Chen, N.G. (2018). A novel oncolytic chimeric orthopoxvirus encoding luciferase enables real-time view of colorectal cancer cell infection. *Mol. Ther. Oncolytics* 9, 13–21.
- Bleau, A.M., Redrado, M., Nistal-Villan, E., Villalba, M., Exposito, F., Redin, E., de Aberasturi, A.L., Larzabal, L., Freire, J., Gomez-Roman, J., and Calvo, A. (2018). miR-146a targets c-met and abolishes colorectal cancer liver metastasis. *Cancer Lett.* 414, 257–267.
- Cancer Genome Atlas Network (2012). Comprehensive molecular characterization of human colon and rectal cancer. *Nature* 487, 330–337.
- Xu, H., Wang, C., Song, H., Xu, Y., and Ji, G. (2019). RNA-Seq profiling of circular RNAs in human colorectal Cancer liver metastasis and the potential biomarkers. *Mol. Cancer* 18, 8.
- Toiyama, Y., Okugawa, Y., Fleshman, J., Richard Boland, C., and Goel, A. (2018). MicroRNAs as potential liquid biopsy biomarkers in colorectal cancer: A systematic review. *Biochim Biophys Acta Rev Cancer* 1870, 274–282.
- Kryeziu, K., Bruun, J., Guren, T.K., Sveen, A., and Lothe, R.A. (2019). Combination therapies with HSP90 inhibitors against colorectal cancer. *Biochim Biophys Acta Rev Cancer* 1871, 240–247.
- Zhang, B., Wang, J., Wang, X., Zhu, J., Liu, Q., Shi, Z., Chambers, M.C., Zimmerman, L.J., Shaddox, K.F., Kim, S., et al.; NCI CPTAC (2014). Proteogenomic characterization of human colon and rectal cancer. *Nature* 513, 382–387.
- Herrera, M., Llorens, C., Rodríguez, M., Herrera, A., Ramos, R., Gil, B., Candia, A., Larriba, M.J., Garre, P., Earl, J., et al. (2018). Differential distribution and enrichment of non-coding RNAs in exosomes from normal and Cancer-associated fibroblasts in colorectal cancer. *Mol. Cancer* 17, 114.
- Li, J., Song, P., Jiang, T., Dai, D., Wang, H., Sun, J., Zhu, L., Xu, W., Feng, L., Shin, V.Y., et al. (2018). Heat shock factor 1 epigenetically stimulates glutamine-1-dependent mTOR activation to promote colorectal carcinogenesis. *Mol. Ther.* 26, 1828–1839.
- Bhartiya, D., Patel, H., Ganguly, R., Shaikh, A., Shukla, Y., Sharma, D., and Singh, P. (2018). Novel insights into adult and cancer stem cell biology. *Stem Cells Dev.* 27, 1527–1539.
- Ribatti, D. (2018). An historical note on the cell theory. *Exp. Cell Res.* 364, 1–4.
- Shastri, A., Choudhary, G., Teixeira, M., Gordon-Mitchell, S., Ramachandra, N., Bernard, L., Bhattacharyya, S., Lopez, R., Pradhan, K., Giricz, O., et al. (2018). Antisense STAT3 inhibitor decreases viability of myelodysplastic and leukemic stem cells. *J. Clin. Invest.* 128, 5479–5488.
- Ma, Y.S., Yu, F., Zhong, X.M., Lu, G.X., Cong, X.L., Xue, S.B., Xie, W.T., Hou, L.K., Pang, L.J., Wu, W., et al. (2018). miR-30 family reduction maintains self-renewal and promotes tumorigenesis in NSCLC-initiating cells by targeting oncogene TM4SF1. *Mol. Ther.* 26, 2751–2765.
- Zhang, Y.J., Ma, Y.S., Xia, Q., Yu, F., Lv, Z.W., Jia, C.Y., Jiang, X.X., Zhang, L., Shao, Y.C., Xie, W.T., et al. (2018). MicroRNA-mRNA integrated analysis based on a case of well-differentiated thyroid cancer with both metastasis and metastatic recurrence. *Oncol. Rep.* 40, 3803–3811.
- Xing, F., Wang, S., and Zhou, J. (2018). The expression of microRNA-598 inhibits ovarian cancer cell proliferation and metastasis by targeting URI. *Mol. Ther. Oncolytics* 12, 9–15.
- Jin, F., Yang, R., Wei, Y., Wang, D., Zhu, Y., Wang, X., Lu, Y., Wang, Y., Zen, K., and Li, L. (2019). HIF-1 $\alpha$ -induced miR-23a~27a~24 cluster promotes colorectal cancer progression via reprogramming metabolism. *Cancer Lett.* 440–441, 211–222.
- Pang, R., Law, W.L., Chu, A.C., Poon, J.T., Lam, C.S., Chow, A.K., Ng, L., Cheung, L.W., Lan, X.R., Lan, H.Y., et al. (2010). A subpopulation of CD26+ cancer stem cells with metastatic capacity in human colorectal cancer. *Cell Stem Cell* 6, 603–615.
- Yue, B., Liu, C., Sun, H., Liu, M., Song, C., Cui, R., Qiu, S., and Zhong, M. (2018). A positive feed-forward loop between lncRNA-CYTOR and Wnt/ $\beta$ -catenin signaling promotes metastasis of colon cancer. *Mol. Ther.* 26, 1287–1298.
- Lu, H.M., Yi, W.W., Ma, Y.S., Wu, W., Yu, F., Fan, H.W., Lv, Z.W., Yang, H.Q., Chang, Z.Y., Zhang, C., et al. (2018). Prognostic implications of decreased



- microRNA-101-3p expression in patients with non-small cell lung cancer. *Oncol. Lett.* 16, 7048–7056.
26. Yu, F., Liu, J.B., Wu, Z.J., Xie, W.T., Zhong, X.J., Hou, L.K., Wu, W., Lu, H.M., Jiang, X.H., Jiang, J.J., et al. (2018). Tumor suppressive microRNA-124a inhibits stemness and enhances gefitinib sensitivity of non-small cell lung cancer cells by targeting ubiquitin-specific protease 14. *Cancer Lett.* 427, 74–84.
  27. Ma, Y.S., Wu, Z.J., Bai, R.Z., Dong, H., Xie, B.X., Wu, X.H., Hang, X.S., Liu, A.N., Jiang, X.H., Wang, G.R., et al. (2018). DRR1 promotes glioblastoma cell invasion and epithelial-mesenchymal transition via regulating AKT activation. *Cancer Lett.* 423, 86–94.
  28. Bhullar, K.S., Lagarón, N.O., McGowan, E.M., Parmar, I., Jha, A., Hubbard, B.P., and Rupasinghe, H.P.V. (2018). Kinase-targeted cancer therapies: progress, challenges and future directions. *Mol. Cancer* 17, 48.
  29. Kwon, J.J., Factora, T.D., Dey, S., and Kota, J. (2018). A systematic review of miR-29 in cancer. *Mol. Ther. Oncolytics* 12, 173–194.
  30. Ma, Y.S., Huang, T., Zhong, X.M., Zhang, H.W., Cong, X.L., Xu, H., Lu, G.X., Yu, F., Xue, S.B., Lv, Z.W., and Fu, D. (2018). Proteogenomic characterization and comprehensive integrative genomic analysis of human colorectal cancer liver metastasis. *Mol. Cancer* 17, 139.
  31. Nimmakayala, R.K., Batra, S.K., and Ponnusamy, M.P. (2019). Unraveling the journey of cancer stem cells from origin to metastasis. *Biochim Biophys Acta Rev Cancer* 1871, 50–63.
  32. Ylä-Herttua, S. (2017). The pharmacology of gene therapy. *Mol. Ther.* 25, 1731–1732.
  33. Bach, D.H., Park, H.J., and Lee, S.K. (2017). The dual role of bone morphogenetic proteins in cancer. *Mol. Ther. Oncolytics* 8, 1–13.
  34. Hou, Z., Guo, K., Sun, X., Hu, F., Chen, Q., Luo, X., Wang, G., Hu, J., and Sun, L. (2018). TRIB2 functions as novel oncogene in colorectal cancer by blocking cellular senescence through AP4/p21 signaling. *Mol. Cancer* 17, 172.
  35. Krishnamurthy, N., and Kurzrock, R. (2018). Targeting the Wnt/beta-catenin pathway in cancer: Update on effectors and inhibitors. *Cancer Treat. Rev.* 62, 50–60.
  36. Xu, S., Yue, Y., Zhang, S., Zhou, C., Cheng, X., Xie, X., Wang, X., and Lu, W. (2018). STON2 negatively modulates stem-like properties in ovarian cancer cells via DNMT1/MUC1 pathway. *J. Exp. Clin. Cancer Res.* 37, 305.
  37. van Duijnhoven, F.J.B., Jenab, M., Hveem, K., Siersema, P.D., Fedirko, V., Duell, E.J., Kampman, E., Halfweg, A., van Kranen, H.J., van den Ouweland, J.M.W., et al. (2018). Circulating concentrations of vitamin D in relation to pancreatic cancer risk in European populations. *Int. J. Cancer* 142, 1189–1201.
  38. Li, H.P., Peng, C.C., Wu, C.C., Chen, C.H., Shih, M.J., Huang, M.Y., Lai, Y.R., Chen, Y.L., Chen, T.W., Tang, P., et al. (2018). Inactivation of the tight junction gene CLDN11 by aberrant hypermethylation modulates tubulins polymerization and promotes cell migration in nasopharyngeal carcinoma. *J. Exp. Clin. Cancer Res.* 37, 102.
  39. Chen, X., Guan, H., Liu, X.D., Xie, D.F., Wang, Y., Ma, T., Huang, B., and Zhou, P.K. (2018). p53 positively regulates the expression of cancer stem cell marker CD133 in HCT116 colon cancer cells. *Oncol. Lett.* 16, 431–438.
  40. Bressy, C., Hastie, E., and Grdzlishvili, V.Z. (2017). Combining oncolytic virotherapy with p53 tumor suppressor gene therapy. *Mol. Ther. Oncolytics* 5, 20–40.
  41. Liu, Y., Lv, J., Liu, J., Liang, X., Jin, X., Xie, J., Zhang, L., Chen, D., Fiskesund, R., Tang, K., et al. (2018). STAT3/p53 pathway activation disrupts IFN- $\beta$ -induced dormancy in tumor-repopulating cells. *J. Clin. Invest.* 128, 1057–1073.
  42. Tzchori, I., Falah, M., Shteynberg, D., Levin Ashkenazi, D., Loberman, Z., Perry, L., and Flugelman, M.Y. (2018). Improved patency of ePTFE grafts as a hemodialysis access site by seeding autologous endothelial cells expressing Fibulin-5 and VEGF. *Mol. Ther.* 26, 1660–1668.
  43. Jiang, T., Ye, L., Han, Z., Liu, Y., Yang, Y., Peng, Z., and Fan, J. (2017). miR-19b-3p promotes colon cancer proliferation and oxaliplatin-based chemoresistance by targeting SMAD4: validation by bioinformatics and experimental analyses. *J. Exp. Clin. Cancer Res.* 36, 131.
  44. Park, E.M., Nguyen, L.N., Lim, Y.S., and Hwang, S.B. (2014). Farnesyl-diphosphate farnesyltransferase 1 regulates hepatitis C virus propagation. *FEBS Lett.* 588, 1813–1820.
  45. Xu, C.Z., Shi, R.J., Chen, D., Sun, Y.Y., Wu, Q.W., Wang, T., and Wang, P.H. (2013). Potential biomarkers for paclitaxel sensitivity in hypopharynx cancer cell. *Int. J. Clin. Exp. Pathol.* 6, 2745–2756.
  46. Natrajan, R., Mackay, A., Wilkerson, P.M., Lambros, M.B., Wetterskog, D., Arnedos, M., Shiu, K.K., Geyer, F.C., Langerod, A., Kreike, B., et al. (2012). Functional characterization of the 19q12 amplicon in grade III breast cancers. *Breast Cancer Res.* 14, R53.
  47. Sato, T., Chang, H.C., Bayeva, M., Shapiro, J.S., Ramos-Alonso, L., Kouzu, H., Jiang, X., Liu, T., Yar, S., Sawicki, K.T., et al. (2018). mRNA-binding protein tristetraprolin is essential for cardiac response to iron deficiency by regulating mitochondrial function. *Proc. Natl. Acad. Sci. USA* 115, E6291–E6300.
  48. Kim, H.C., Chang, J., Lee, H.S., and Kwon, H.J. (2017). Mitochondrial UQCRB as a new molecular prognostic biomarker of human colorectal cancer. *Exp. Mol. Med.* 49, e391.
  49. Jun, K.H., Kim, S.Y., Yoon, J.H., Song, J.H., and Park, W.S. (2012). Amplification of the UQCRFS1 gene in gastric cancers. *J. Gastric Cancer* 12, 73–80.

**OMTO, Volume 14**

## **Supplemental Information**

### **Dual Regulatory Mechanisms of Expression and Mutation Involving Metabolism-Related Genes**

#### **FDFT1 and UQCR5 during CLM**

**Yu-Shui Ma, Zhi-Jun Wu, Hong-Wei Zhang, Bo Cai, Tao Huang, Hui-Deng Long, Hong Xu, Yong-Zhong Zhao, Yu-Zhen Yin, Shao-Bo Xue, Liu Li, Cheng-Lin Liu, Ru-Ting Xie, Lin-Lin Tian, Ji-Bin Liu, Xu-Ming Wu, and Da Fu**



## Supplementary Figures and Legends

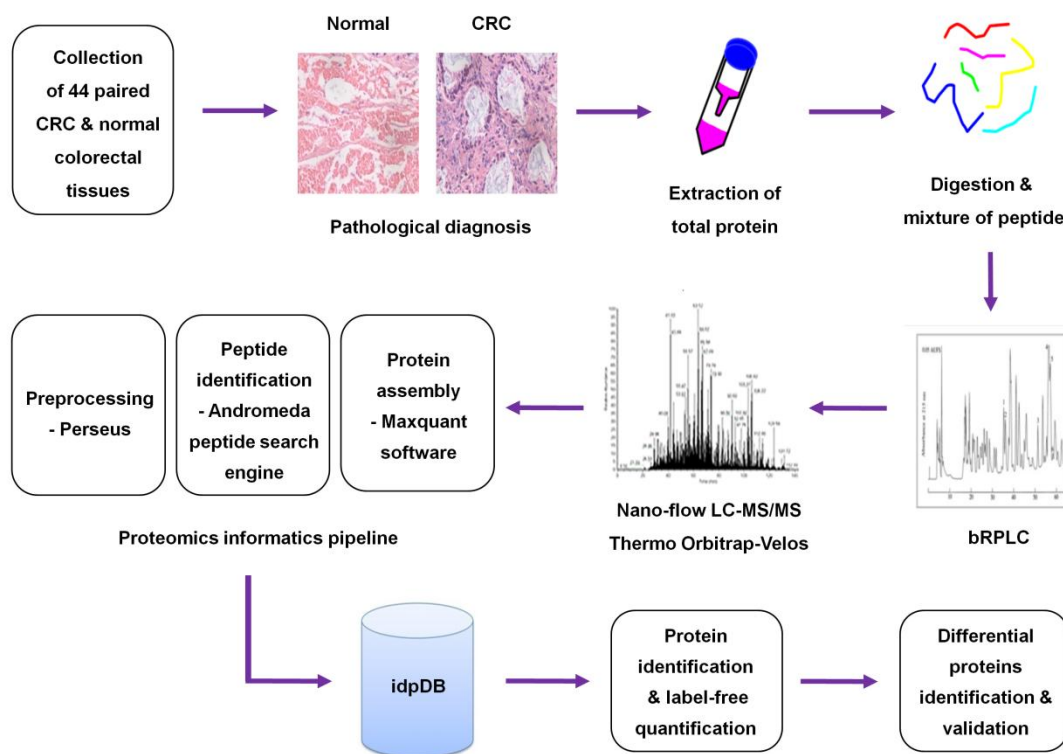

**Figure S1. Mass-spectrometry-based proteomics workflow.** Protein was extracted from 44 CRC and paired PN tissues and was used to generate tryptic digests. The resulting tryptic peptides were fractionated using off-line bRPLC. Collected fractions were pooled and used with a Thermo Orbitrap-Velos MS instrument. Raw data were processed by Perseus software and then used for database and spectral library evaluation using the Andromeda peptide search engine. Identified peptides were assembled using Maxquant software. bRPLC, basic reverse-phase (high-pressure) liquid chromatography; CRC, colorectal cancer; PN paracarcinoma normal tissue.

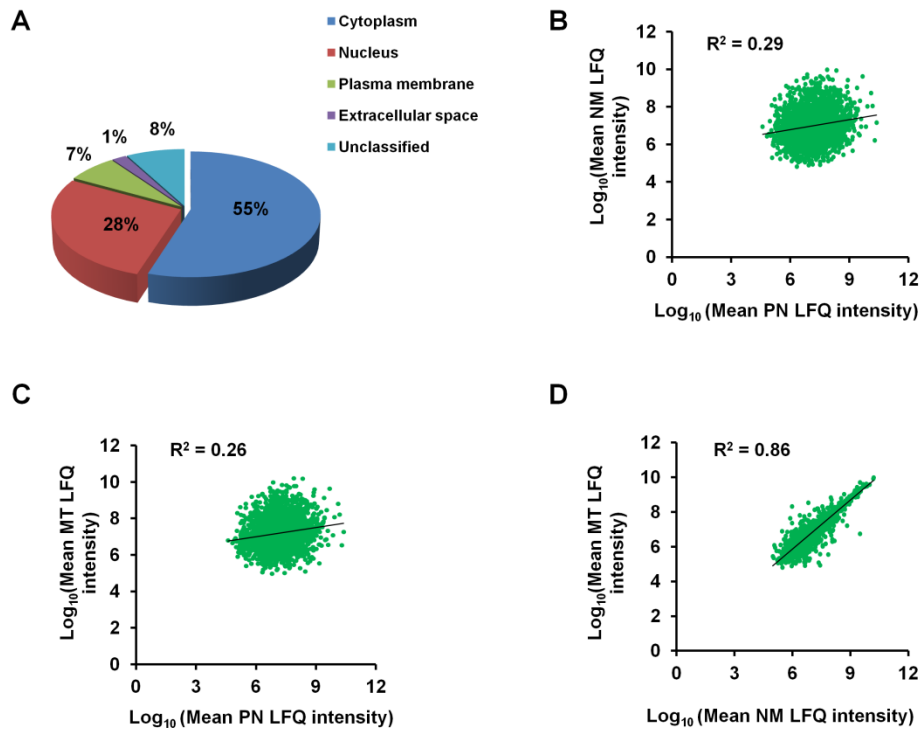

**Figure S2. Peptide and protein identification of 44 paired CRC samples.** A, The cellular distribution is shown for 5758 proteins identified from 44 CRC patients by mass spectrometry, with a false discovery rate of 1.0 %. Correlation analysis of protein expression between 21 NM and paired PN samples (B), 23 MT and paired PN samples (C), or 23 MT and 21 NM samples (D).

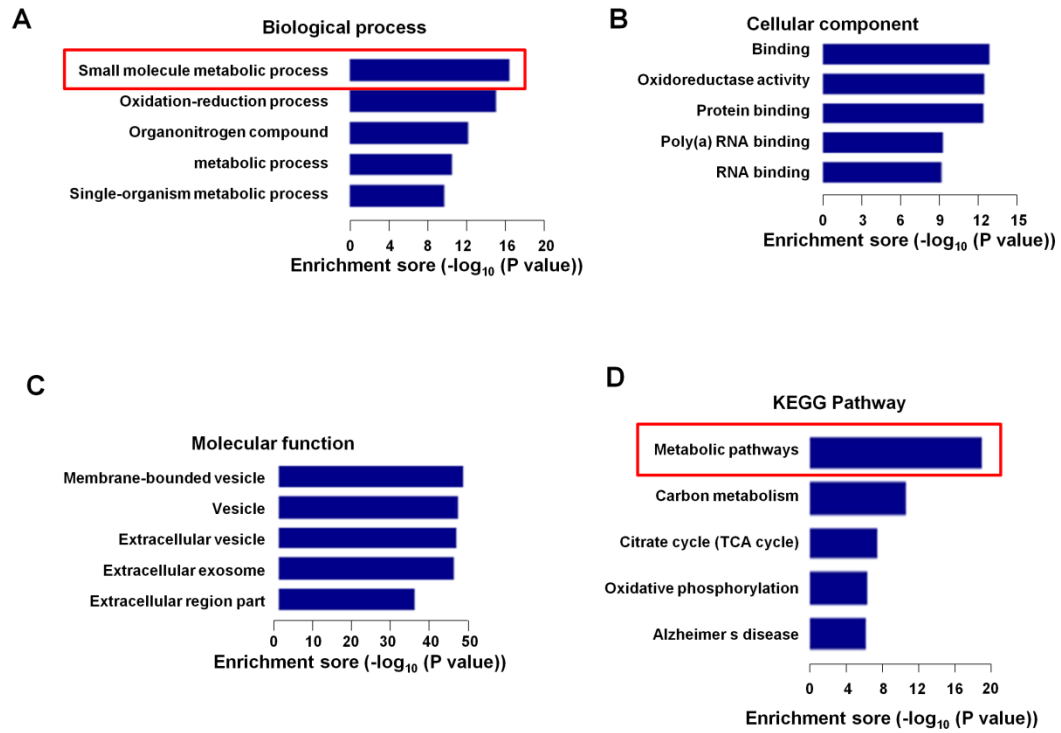

**Figure S3. GO and KEGG pathway analysis of differentially expressed protein.**

Gene Ontology using STRING online analysis software classified the 2170 differentially expressed proteins in CLM according to their biological process (A), cellular component (B) and molecular function (C). D, KEGG pathway analysis of the 2170 differentially expressed proteins.

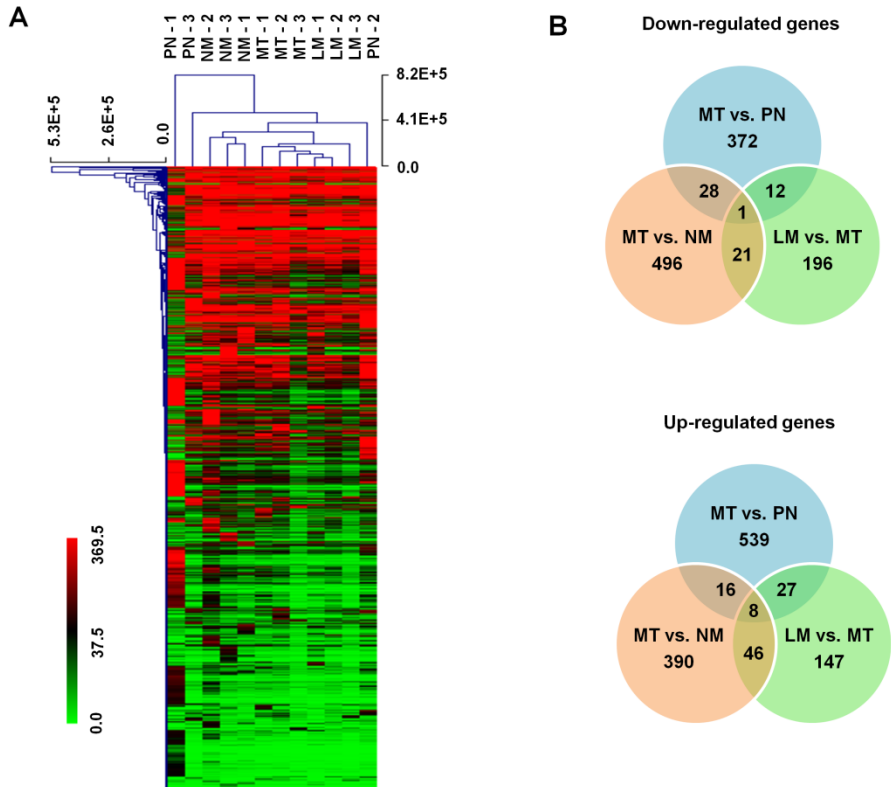

**Figure S4. RNA sequencing and identification of differentially expressed mRNAs. A,** Hierarchical clustering for RNA-sequencing data of 12 samples. **B,** Significantly changed genes among three groups from RNA-sequencing data of 12 samples.



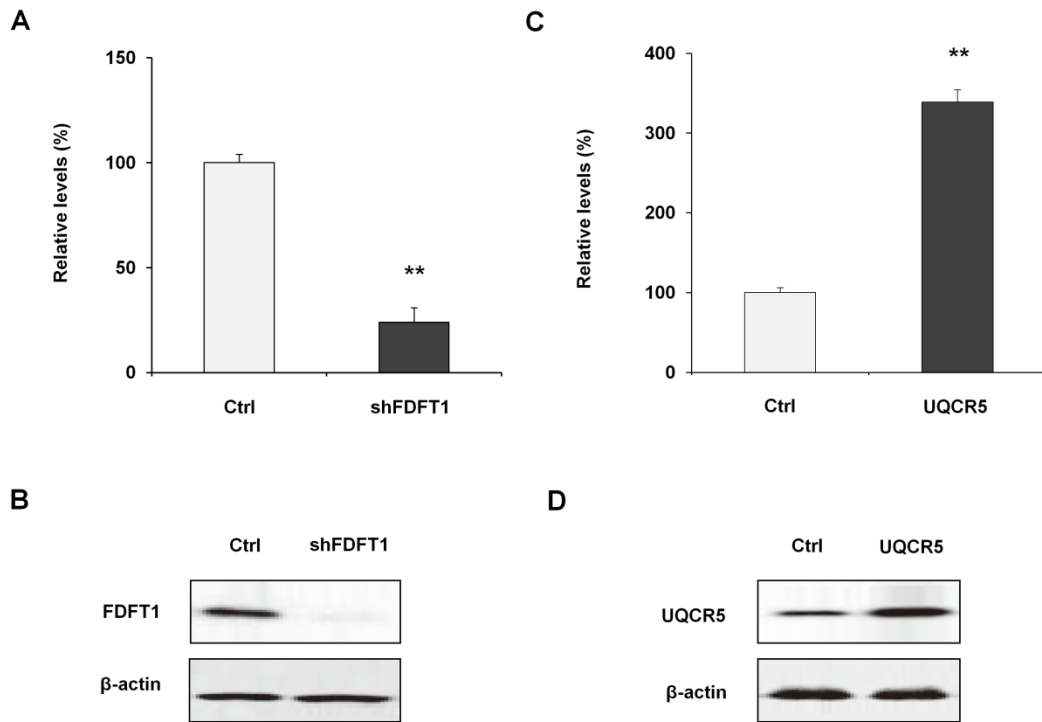

**Figure S5. qRT-PCR and Western blot to quantify FDFT1 and UQCR5 levels in SW480 cells.** A, qRT-PCR measurement of the levels of FDFT1 mRNA in SW480 cells treated with negative control or shFDFT1. A, Western blot measurement of the levels of FDFT1 protein in SW480 cells treated with negative control or shFDFT1. C, qRT-PCR measurement of the levels of UQCR5 mRNA in SW480 cells treated with negative control or UQCR5 overexpression plasmid. D, Western blot measurement of the levels of UQCR5 protein in SW480 cells treated with negative control or UQCR5 overexpression plasmid. Data shown are the means  $\pm$  SD of three independent experiments. Statistical analyses were performed with one-way ANOVA (\*\* =  $P < 0.01$ ).

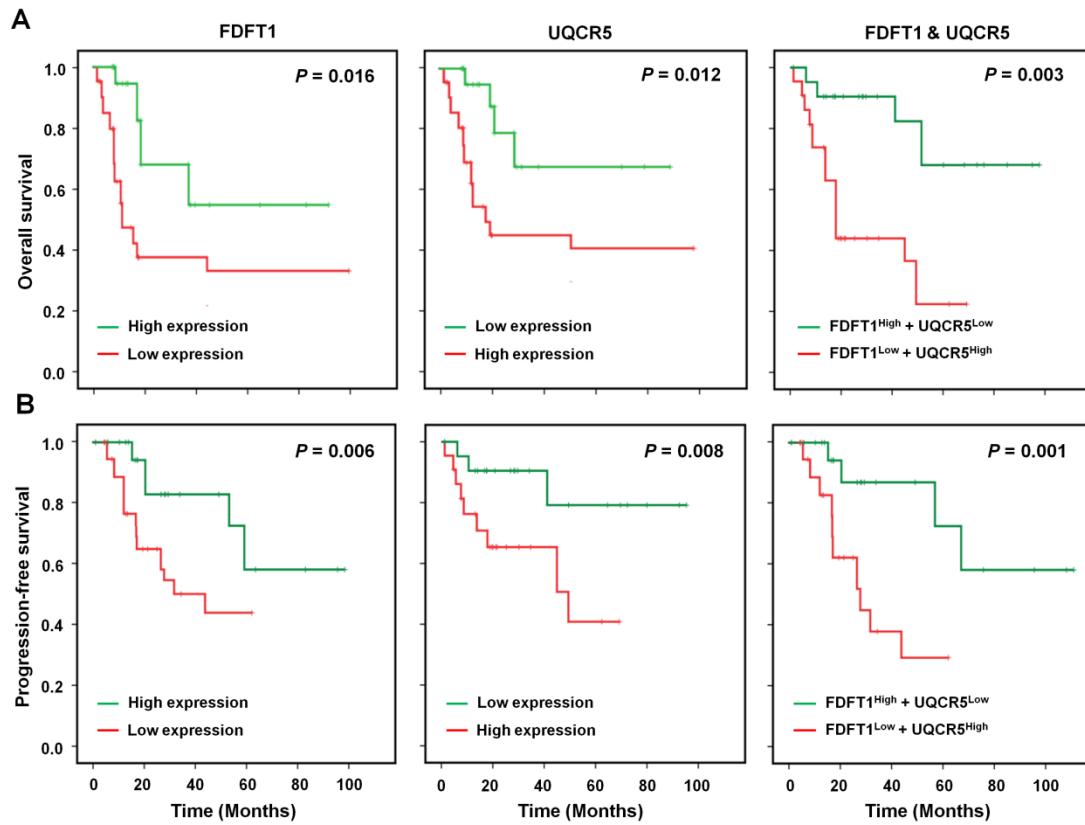

**Figure S6. Clinical significance of FDFT1 and UQCR5 in 44 CRC.** Kaplan-Meier survival analysis to evaluate the prognostic value of FDFT1 or/and UQCR5 expression for OS (A) and PFS (B) of 44 CRC patients.

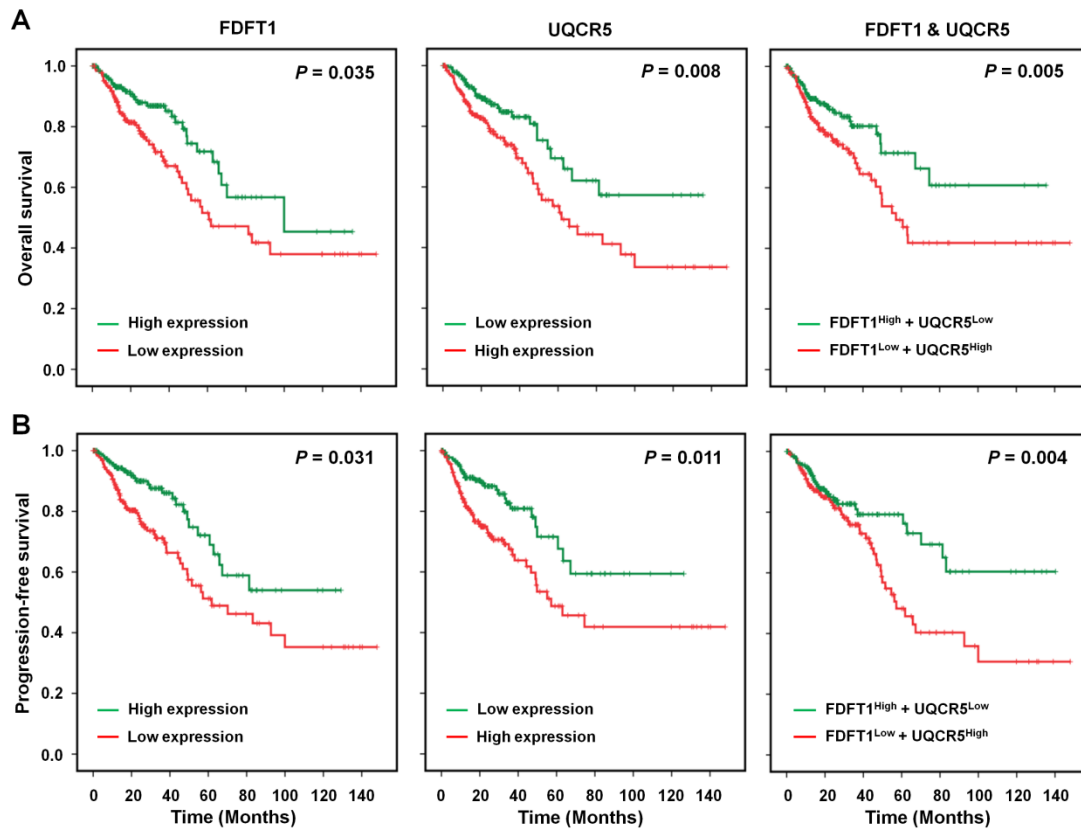

**Figure S7. Clinical significance of FDFT1 and UQCR5 in 379 CRC patients from TCGA portal.** Kaplan-Meier survival analysis was used to evaluate the prognostic value of FDFT1 and/or UQCR5 expression in 379 CRC patients from TCGA portal for OS (A) and PFS (B).

**Table S1. Summary of CRC patients demographic and clinical characteristics.**

| Factor                 | Variables  | Non-metastatic (N = 21) | Metastatic to liver (N = 23) |
|------------------------|------------|-------------------------|------------------------------|
|                        |            | Number (%)              | Number (%)                   |
| Age                    | ≥ 60       | 14 (66.7%)              | 11 (47.8%)                   |
|                        | < 60       | 7 (33.3%)               | 12 (52.2%)                   |
| Gender                 | Male       | 11 (52.4%)              | 10 (43.5%)                   |
|                        | Female     | 10 (47.6%)              | 13 (56.5%)                   |
| Primary site           | Colon      | 9 (42.9%)               | 14 (60.9%)                   |
|                        | Rectum     | 12 (57.1%)              | 9 (39.1%)                    |
| Differentiation        | Well       | 0 (0.0%)                | 0 (0.0%)                     |
|                        | Moderately | 16 (76.2%)              | 16 (69.6%)                   |
|                        | Poorly     | 5 (23.8%)               | 7 (30.4%)                    |
| Completeness           | R0         | 21 (100.0%)             | 23 (100.0%)                  |
|                        | R1         | 0 (0.0%)                | 0 (0.0%)                     |
| Diameter               | ≥ 5 cm     | 10 (47.6%)              | 10 (43.5%)                   |
|                        | < 5 cm     | 11 (52.4%)              | 13 (56.5%)                   |
| Number of primary foci | Multiple   | 8 (38.1%)               | 9 (39.1%)                    |
|                        | Single     | 13 (61.9%)              | 14 (60.9%)                   |
| TNM stage              | I          | 10 (47.6%)              | 2 (8.7%)                     |
|                        | II         | 6 (28.6%)               | 3(13.0%)                     |
|                        | III        | 5 (23.8%)               | 12 (52.2%)                   |
|                        | IV         | 0 (0.0%)                | 6 (26.1%)                    |



|          |     |            |            |
|----------|-----|------------|------------|
| Necrosis | Yes | 11 (52.4%) | 10 (43.5%) |
|          | No  | 10 (47.6%) | 13 (56.5%) |

**Table S2. Prognosis analysis based on clinical characteristics of 374 CRC patients.**

| Factor                   | Variable | N   | Overall survival |               |         | Progression free survival |               |         | Hazard Ratio |                     |         |
|--------------------------|----------|-----|------------------|---------------|---------|---------------------------|---------------|---------|--------------|---------------------|---------|
|                          |          |     | Months (Mean)    | 95% CI (Mean) | P value | Months (Mean)             | 95% CI (Mean) | P value | Hazard Ratio | 95% CI (univariate) | P value |
| Age                      | ≥ 60     | 245 | 30.89            | 26.32 - 34.21 | 0.825   | 30.26                     | 26.89 - 34.54 | 0.779   | 1.21         | 1.03 - 1.61         | 0.438   |
|                          | < 60     | 129 | 31.52            | 26.12 - 34.93 |         | 31.02                     | 26.55 - 34.83 |         |              |                     |         |
| Gender                   | Male     | 206 | 31.11            | 27.27 - 33.94 | 0.147   | 30.12                     | 26.33 - 35.04 | 0.196   | 1.11         | 0.93 - 1.22         | 0.798   |
|                          | Female   | 168 | 31.87            | 26.01 - 35.74 |         | 31.29                     | 25.76 - 34.83 |         |              |                     |         |
| Lymph node metastasis    | Positive | 169 | 27.34            | 25.43 - 29.58 | <0.001  | 28.02                     | 26.04 - 30.96 | <0.001  | 2.31         | 1.49 - 3.61         | 0.021   |
|                          | Negative | 205 | 31.28            | 29.72 - 33.87 |         | 31.33                     | 29.26 - 33.41 |         |              |                     |         |
| TNM stage                | III-IV   | 307 | 26.69            | 24.36 - 29.83 | 0.012   | 26.04                     | 24.33 - 29.98 | <0.001  | 2.52         | 1.94 - 4.21         | <0.001  |
|                          | I-II     | 67  | 31.58            | 26.19 - 33.48 |         | 31.96                     | 26.87 - 34.56 |         |              |                     |         |
| Lympho-vascular invasion | Positive | 101 | 29.67            | 27.89 - 32.26 | 0.058   | 30.09                     | 26.89 - 32.76 | 0.066   | 1.89         | 0.93 - 2.52         | 0.068   |
|                          | Negative | 228 | 31.03            | 26.74 - 34.52 |         | 31.53                     | 26.24 - 33.75 |         |              |                     |         |
|                          | Unknown  | 45  | 29.31            | 27.65 - 35.43 |         | 29.31                     | 27.65 - 35.43 |         |              |                     |         |
| Vascular invasion        | Positive | 76  | 28.39            | 26.45 - 30.33 | 0.045   | 27.95                     | 24.36 - 30.85 | 0.038   | 2.59         | 1.69 - 3.97         | <0.001  |
|                          | Negative | 247 | 31.04            | 28.71 - 34.31 |         | 30.83                     | 26.77 - 33.61 |         |              |                     |         |
|                          | Unknown  | 51  | 29.33            | 27.58 - 33.46 |         | 29.34                     | 26.62 - 33.41 |         |              |                     |         |
| Diameter                 | ≥ 2 cm   | 168 | 26.86            | 24.39 - 29.01 | < 0.001 | 26.56                     | 24.21 - 30.04 | < 0.001 | 2.69         | 1.88 - 4.05         | <0.001  |
|                          | < 2 cm   | 206 | 29.86            | 27.39 - 33.01 |         | 29.35                     | 27.86 - 33.21 |         |              |                     |         |

**Table S3. Association between deregulated genes expression and clinicopathological characteristics in 374 CRC patients.**

| Factor                      | Variable | N   | BGN                 |       | EHD2                |       | UQCR5               |       | COL1A2                |       | FDFT1               |       |
|-----------------------------|----------|-----|---------------------|-------|---------------------|-------|---------------------|-------|-----------------------|-------|---------------------|-------|
|                             |          |     | Exp.                | P val | Exp.                | P val | Exp.                | P val | Exp.                  | P val | Exp.                | P val |
| Age                         | ≥ 60     | 245 | 7382.77 ±<br>57.51  | 0.059 | 988.15 ±<br>106.822 | 0.096 | 2306.19 ±<br>77.25  | 0.355 | 44266.64 ±<br>4471.07 | 0.143 | 4859.76 ±<br>278.89 | 0.691 |
|                             | < 60     | 129 | 5913.18 ±<br>83.25  |       | 1158.61 ±<br>89.22  |       | 2218.22 ±<br>105.94 |       | 36716.91 ±<br>5477.49 |       | 4973.92 ±<br>273.91 |       |
| Gender                      | Male     | 206 | 6482.14 ±<br>685.82 | 0.593 | 996.25 ±<br>94.87   | 0.087 | 2312.88 ±<br>98.64  | 0.229 | 40475.24 ±<br>4459.14 | 0.967 | 4820.44 ±<br>283.99 | 0.449 |
|                             | Female   | 168 | 6886.32 ±<br>776.09 |       | 1171.99 ±<br>104    |       | 2197.98 ±<br>82.15  |       | 40691.79 ±<br>5589.24 |       | 5037.77 ±<br>266.55 |       |
| Lymph<br>node<br>metastasis | Positive | 169 | 8056.72 ±<br>672.64 | 0.005 | 1242.81 ±<br>96.23  | 0.009 | 2396.53 ±<br>98.44  | 0.005 | 47442.41 ±<br>4783.17 | 0.042 | 4249.89 ±<br>272.39 | 0.001 |
|                             | Negative | 205 | 5769.78 ±<br>804.92 |       | 953.42 ±<br>106.12  |       | 2100.17 ±<br>84.66  |       | 36080.96 ±<br>5487.47 |       | 5241.01 ±<br>246.66 |       |
| TNM stage                   | III-IV   | 307 | 7180.22 ±<br>700.48 | 0.002 | 1138.28 ±<br>104.19 | 0.008 | 2380.39 ±<br>81.34  | 0.033 | 43495.06 ±<br>5095.37 | 0.014 | 4748.09 ±<br>283.47 | 0.012 |
|                             | I-II     | 67  | 4116.95 ±<br>754.57 |       | 784.39 ±<br>91.94   |       | 2141.84 ±<br>99.18  |       | 26943.58 ±<br>4842.12 |       | 5682.63 ±<br>267.95 |       |
| Lympho-                     | Positive | 101 | 9164.55 ±           | 0.001 | 1387.15 ±           | 0.001 | 2319.57 ±           | 0.018 | 53918.21 ±            | 0.008 | 4117.85 ±           | 0.001 |

|                   |          |           |           |           |           |           |           |            |            |           |           |       |
|-------------------|----------|-----------|-----------|-----------|-----------|-----------|-----------|------------|------------|-----------|-----------|-------|
| vascular invasion |          |           | 752.61    |           | 92.55     |           | 82.19     |            | 4884.51    |           | 284.67    |       |
|                   | Negative | 228       | 5989.06 ± |           | 979.59 ±  |           | 2070.79 ± |            | 37457.02 ± |           | 5236.09 ± |       |
|                   |          |           | 744.28    |           | 112.35    |           | 103.63    |            | 5547.11    |           | 254.64    |       |
|                   | Unknown  | 46        | 7718.94 ± |           | 1218.94 ± |           | 2217.64 ± |            | 39918.94 ± |           | 4418.94 ± |       |
| 955.53            |          |           |           | 95.53     |           | 95.88     |           | 9855.53    |            | 335.53    |           |       |
| Vascular invasion | Positive | 76        | 8075.33 ± | 0.048     | 1305.52 ± | 0.037     | 2295.64 ± | 0.039      | 49634.54 ± | 0.034     | 4264.56 ± | 0.031 |
|                   |          |           | 685.82    |           | 94.87     |           | 82.15     |            | 4459.14    |           | 283.99    |       |
|                   | Negative | 247       | 6411.98 ± |           | 1026.79 ± |           | 2001.96 ± |            | 40229.51 ± |           | 5022.76 ± |       |
|                   |          |           | 776.09    |           | 104.01    |           | 98.64     |            | 5589.24    |           | 266.55    |       |
| Unknown           | 57       | 6920.36 ± |           | 1120.36 ± |           | 2112.36 ± |           | 45520.36 ± |            | 5020.36 ± |           |       |
|                   |          | 855.45    |           | 95.45     |           | 95.46     |           | 5455.45    |            | 265.45    |           |       |
| Diameter          | ≥ 2 cm   | 168       | 8716.08 ± | 0.001     | 1406.11 ± | 0.001     | 2394.95 ± | 0.022      | 50931.51 ± | 0.017     | 2802.45 ± | 0.023 |
|                   |          |           | 558.84    |           | 71.39     |           | 83.58     |            | 3572.48    |           | 312.14    |       |
|                   | < 2 cm   | 206       | 5776.66 ± |           | 970.41 ±  |           | 2010.82 ± |            | 37502.59 ± |           | 5200.36 ± |       |
|                   |          |           | 859.58    |           | 117.26    |           | 214.38    |            | 5960.01    |           | 251.85    |       |



**Supplementary Table 4. SAAVs in NM-specific sample.**

| <b>Protein Variants</b> | <b>Accession number</b> | <b>Protein_Change</b> | <b>Exon</b> | <b>RefSeq</b> | <b>Chrs</b> | <b>Position</b> | <b>cDNA_Change</b> | <b>SIFT Score</b> | <b>PolyPhenV2</b> |
|-------------------------|-------------------------|-----------------------|-------------|---------------|-------------|-----------------|--------------------|-------------------|-------------------|
| ABCA4                   | P78363                  | p.W1479X              | exon30      | NM_000350     | 1           | 94495103        | c.4437G>A          | 0                 | 0.735             |
| ACTR10                  | Q9NZ32                  | p.I258V               | exon10      | NM_018477     | 14          | 58690558        | c.772A>G           | 1                 | 0                 |
| ACTRT1                  | Q8TDG2                  | p.L70M                | exon1       | NM_138289     | X           | 127185978       | c.208T>A           | 0.01              | 0.004             |
| ETNPPL                  | Q8TBG4                  | p.G118V               | exon5       | NM_001146627  | 4           | 109674142       | c.353G>T           | 0                 | 0.997             |
| AKAP1                   | Q92667                  | p.S651N               | exon4       | NM_003488     | 17          | 55189262        | c.1952G>A          | 0.95              | 0                 |
| ALDH18A1                | P54886                  | p.Q4X                 | exon2       | NM_001017423  | 10          | 97413125        | c.10C>T            | 0.13              | 0.728             |
| ANKRD11                 | Q6UB99                  | p.S56C                | exon4       | NM_013275     | 16          | 89371674        | c.166A>T           | 0                 | 0.053             |
| ANO1                    | Q5XXA6                  | p.G154R               | exon3       | NM_018043     | 11          | 69949190        | c.460G>A           | 0.37              |                   |
| ARHGAP20                | Q9P2F6                  | p.A995V               | exon16      | NM_020809     | 11          | 110450686       | c.2984C>T          | 0.26              | 0.001             |
| ARHGAP36                | Q6ZRI8                  | p.T126P               | exon4       | NM_144967     | X           | 130217764       | c.376A>C           | 0.02              | 0.899             |
| ARMC9                   | Q7Z3E5                  | p.R405C               | exon14      | NM_025139     | 2           | 232137670       | c.1213C>T          | 0                 | 1                 |
| BAI1                    | O14514                  | p.A214T               | exon1       | NM_001702     | 8           | 143546199       | c.640G>A           | 1                 |                   |
| BMP10                   | O95393                  | p.E420K               | exon2       | NM_014482     | 2           | 69092780        | c.1258G>A          | 0.07              | 0.206             |
| C16orf70                | Q9BSU1                  | p.G113A               | exon5       | NM_025187     | 16          | 67166411        | c.338G>C           | 0                 | 0.998             |
| CCDC189                 | A1A4V9                  | p.C145F               | exon4       | NM_001014979  | 16          | 30771640        | c.434G>T           | 0.98              | 0.999             |
| TMEM249                 | Q2WVGJ8                 | p.R206H               | exon5       | NM_001252402  | 8           | 145577099       | c.617G>A           | 0                 |                   |
| CABIN1                  | Q9Y6J0                  | p.G75S                | exon5       | NM_001199281  | 22          | 24437599        | c.223G>A           | 0.25              | 0.405             |
| CACNA1H                 | O95180                  | p.T1615P              | exon27      | NM_021098     | 16          | 1263845         | c.4843A>C          | 0                 |                   |
| CCDC120                 | Q96HB5                  | p.A559G               | exon10      | NM_001163323  | X           | 48925467        | c.1676C>G          | 0.41              | 0                 |
| CCDC39                  | Q9UFE4                  | p.E81K                | exon3       | NM_181426     | 3           | 180379765       | c.241G>A           | 0                 |                   |
| CCDC39                  | Q9UFE4                  | p.Q660H               | exon14      | NM_181426     | 3           | 180349275       | c.1980G>T          | 0                 |                   |
| CCNK                    | O75909                  | p.H406P               | exon11      | NM_001099402  | 14          | 99976593        | c.1217A>C          | 0.09              |                   |
| CD109                   | Q6YHK3                  | p.K556X               | exon14      | NM_133493     | 6           | 74477946        | c.1666A>T          | 0.13              | 0.693             |
| CD3G                    | P09693                  | p.L110R               | exon4       | NM_000073     | 11          | 118221288       | c.329T>G           | 0                 | 0.992             |
| CETP                    | P11597                  | p.D487N               | exon16      | NM_000078     | 16          | 57017555        | c.1459G>A          | 0.18              | 0.726             |
| CHST6                   | Q9GZX3                  | p.R155Q               | exon3       | NM_021615     | 16          | 75513263        | c.464G>A           | 0.83              | 0.027             |

|         |        |          |        |              |    |           |            |      |       |
|---------|--------|----------|--------|--------------|----|-----------|------------|------|-------|
| CLSPN   | Q9HAW4 | p.D64E   | exon3  | NM_001190481 | 1  | 36230257  | c.192C>A   | 0    | 0.187 |
| CNOT4   | O95628 | p.R46H   | exon2  | NM_001190850 | 7  | 135122943 | c.137G>A   | 0    | 0.999 |
| COL12A1 | Q99715 | p.P1565H | exon26 | NM_004370    | 6  | 75853101  | c.4694C>A  |      | 0.998 |
| COL8A1  | P27658 | p.G659S  | exon4  | NM_020351    | 3  | 99514720  | c.1975G>A  | 0    | 0.999 |
| CPN2    | P22792 | p.D415Y  | exon2  | NM_001080513 | 3  | 194062189 | c.1243G>T  | 0.01 | 0.989 |
| CPZ     | Q66K79 | p.R219H  | exon3  | NM_003652    | 4  | 8605895   | c.656G>A   | 0.09 | 0.951 |
| CREBBP  | Q92793 | p.D1665N | exon30 | NM_004380    | 16 | 3781372   | c.4993G>A  | 0.01 | 0.783 |
| CST7    | O76096 | p.C110Y  | exon3  | NM_003650    | 20 | 24939649  | c.329G>A   | 0    | 0.727 |
| CUX2    | O14529 | p.A863T  | exon17 | NM_015267    | 12 | 111758400 | c.2587G>A  | 0.2  | 0     |
| DDX31   | Q9H8H2 | p.S303I  | exon7  | NM_022779    | 9  | 135527875 | c.908G>T   | 0.02 | 0.89  |
| DGKB    | Q9Y6T7 | p.S172P  | exon6  | NM_145695    | 7  | 14741308  | c.514T>C   | 0.01 |       |
| EFNB1   | P98172 | p.R154C  | exon3  | NM_004429    | X  | 68059560  | c.460C>T   | 0.05 | 0.717 |
| EML5    | Q05BV3 | p.D1295N | exon27 | NM_183387    | 14 | 89123841  | c.3883G>A  | 0    |       |
| ERI2    | A8K979 | p.P623L  | exon9  | NM_001142725 | 16 | 20809254  | c.1868C>T  | 0    |       |
| FAM69C  | Q0P6D2 | p.R111W  | exon2  | NM_001044369 | 18 | 72114386  | c.331C>T   | 0.05 |       |
| FANCG   | O15287 | p.S383F  | exon10 | NM_004629    | 9  | 35075747  | c.1148C>T  | 0.03 | 0     |
| FYCO1   | Q9BQS8 | p.G973S  | exon8  | NM_024513    | 3  | 46007909  | c.2917G>A  | 0.75 | 0     |
| GCM2    | O75603 | p.R143W  | exon3  | NM_004752    | 6  | 10876707  | c.427C>T   | 0    | 1     |
| GLI2    | P10070 | p.P906L  | exon13 | NM_005270    | 2  | 121746207 | c.2717C>T  | 0    | 0.998 |
| GZMA    | P12544 | p.I191V  | exon4  | NM_006144    | 5  | 54404166  | c.571A>G   | 0    | 0.149 |
| HIF3A   | Q9Y2N7 | p.E582K  | exon13 | NM_152795    | 19 | 46834444  | c.1744G>A  | 0.28 | 0     |
| HMCN1   | Q96RW7 | p.R3793H | exon74 | NM_031935    | 1  | 186084052 | c.11378G>A | 0.01 | 0.999 |
| HUWE1   | Q7Z6Z7 | p.A2634V | exon57 | NM_031407    | X  | 53586329  | c.7901C>T  | 0.07 | 0.125 |
| IGSF3   | O75054 | p.V489M  | exon7  | NM_001542    | 1  | 117146465 | c.1465G>A  | 0.01 | 0.003 |
| IKZF4   | Q9H2S9 | p.R489L  | exon8  | NM_022465    | 12 | 56428823  | c.1466G>T  | 0.01 |       |
| KAT6A   | Q92794 | p.Q1335X | exon18 | NM_001099413 | 8  | 41791735  | c.4003C>T  | 0.48 | 0.735 |
| KCNF1   | Q9H3M0 | p.R299C  | exon1  | NM_002236    | 2  | 11053447  | c.895C>T   | 0    | 1     |
| LY86    | O95711 | p.G37S   | exon1  | NM_004271    | 6  | 6589076   | c.109G>A   | 0.34 | 0.081 |
| MAGEC1  | O60732 | p.W717L  | exon4  | NM_005462    | X  | 140995340 | c.2150G>T  | 0    | 0.489 |
| MGA     | Q8IWI9 | p.T2716M | exon24 | NM_001164273 | 15 | 42058427  | c.8147C>T  | 0    |       |

|         |        |          |        |              |    |           |           |      |       |
|---------|--------|----------|--------|--------------|----|-----------|-----------|------|-------|
| MUC12   | Q9UKN1 | p.D868N  | exon2  | NM_001164462 | 7  | 100636446 | c.2602G>A |      |       |
| MUC12   | Q9UKN1 | p.D868G  | exon2  | NM_001164462 | 7  | 100636447 | c.2603A>G |      |       |
| NDST1   | P52848 | p.L182F  | exon3  | NM_001543    | 5  | 149907396 | c.544C>T  | 0.03 | 0.02  |
| NID1    | P14543 | p.D171Y  | exon2  | NM_002508    | 1  | 236212004 | c.511G>T  | 0.04 | 0.001 |
| NPDC1   | Q9NQX5 | p.A232V  | exon6  | NM_015392    | 9  | 139934979 | c.695C>T  | 0.51 | 0.253 |
| NRK     | Q7Z2Y5 | p.Q554K  | exon13 | NM_198465    | X  | 105153293 | c.1660C>A | 0.03 |       |
| NRK     | Q7Z2Y5 | p.N1282S | exon23 | NM_198465    | X  | 105183911 | c.3845A>G | 0.08 |       |
| NWD1    | Q149M9 | p.V1279I | exon18 | NM_001007525 | 19 | 16918495  | c.3835G>A | 0.87 | 0.085 |
| OR1N2   | Q8NGR9 | p.M175I  | exon1  | NM_001004457 | 9  | 125315973 | c.525G>A  | 0.49 | 0.291 |
| PABPC1  | P11940 | p.L126V  | exon2  | NM_002568    | 8  | 101730326 | c.376C>G  | 0    | 0.51  |
| PABPC1  | P11940 | p.G123C  | exon2  | NM_002568    | 8  | 101730335 | c.367G>T  | 0    | 0.998 |
| PABPC1  | P11940 | p.R419C  | exon9  | NM_002568    | 8  | 101721442 | c.1255C>T | 0.01 | 0     |
| PABPC1  | P11940 | p.T416S  | exon9  | NM_002568    | 8  | 101721451 | c.1246A>T | 0.46 | 0     |
| PAPLN   | O95428 | p.C626Y  | exon15 | NM_173462    | 14 | 73726226  | c.1877G>A | 0    | 0.999 |
| PHF20   | Q9BVI0 | p.R882C  | exon16 | NM_016436    | 20 | 34526962  | c.2644C>T | 0.01 | 0.992 |
| PQLC1   | Q8N2U9 | p.T112I  | exon3  | NM_001146345 | 18 | 77703331  | c.335C>T  | 0.11 | 0     |
| PRSS3   | P35030 | p.F150S  | exon3  | NM_002771    | 9  | 33798075  | c.449T>C  | 0.45 | 0     |
| PRSS3   | P35030 | p.W222R  | exon5  | NM_002771    | 9  | 33799098  | c.664T>C  | 0.22 | 0     |
| PRSS3   | P35030 | p.W222X  | exon5  | NM_002771    | 9  | 33799099  | c.665G>A  | 0.19 | 0.589 |
| PTPN21  | Q16825 | p.Y569H  | exon13 | NM_007039    | 14 | 88946070  | c.1705T>C | 0    | 0.997 |
| NECTIN4 | Q96NY8 | p.I398V  | exon7  | NM_030916    | 1  | 161043551 | c.1192A>G | 0.13 | 0.74  |
| PXDNL   | A1KZ92 | p.D828H  | exon17 | NM_144651    | 8  | 52321702  | c.2482G>C | 0    |       |
| QKI     | Q96PU8 | p.T317M  | exon7  | NM_206853    | 6  | 163986993 | c.950C>T  | 0.01 | 0.535 |
| RFC4    | P35249 | p.K63Q   | exon3  | NM_002916    | 3  | 186518929 | c.187A>C  | 0.1  | 0.001 |
| RILPL1  | Q5EBL4 | p.R293W  | exon5  | NM_178314    | 12 | 123970277 | c.877C>T  | 0    |       |
| RIMS1   | Q86UR5 | p.E23K   | exon1  | NM_001168407 | 6  | 72922892  | c.67G>A   |      |       |
| RPA4    | Q13156 | p.S22G   | exon1  | NM_013347    | X  | 96139373  | c.64A>G   | 0.17 | 0.042 |
| SAFB2   | Q14151 | p.T950P  | exon21 | NM_014649    | 19 | 5587268   | c.2848A>C | 0    | 0.557 |
| SBF1    | O95248 | p.A5P    | exon1  | NM_002972    | 22 | 50913257  | c.13G>C   | 0    | 0.957 |
| SDR9C7  | Q8NEX9 | p.R276H  | exon4  | NM_148897    | 12 | 57317732  | c.827G>A  | 0.02 | 0.716 |

|          |        |         |        |              |    |           |           |      |       |
|----------|--------|---------|--------|--------------|----|-----------|-----------|------|-------|
| SELPLG   | Q14242 | p.A131V | exon2  | NM_003006    | 12 | 109017692 | c.392C>T  | 0.29 |       |
| SELPLG   | Q14242 | p.A131T | exon2  | NM_003006    | 12 | 109017693 | c.391G>A  | 0.3  |       |
| SLC11A1  | P49279 | p.S511N | exon14 | NM_000578    | 2  | 219259498 | c.1532G>A | 0.18 | 0     |
| SLC2A8   | Q9NY64 | p.A81T  | exon3  | NM_014580    | 9  | 130160205 | c.241G>A  | 0.07 | 0.988 |
| SLC30A3  | Q99726 | p.P216L | exon5  | NM_003459    | 2  | 27480152  | c.647C>T  | 0.15 | 0.049 |
| SLC8A3   | P57103 | p.R488H | exon2  | NM_033262    | 14 | 70633677  | c.1463G>A | 0    | 0.925 |
| SPAG8    | Q99932 | p.G472R | exon7  | NM_001039592 | 9  | 35809979  | c.1414G>A | 0    | 0.394 |
| SPATC1   | Q76KD6 | p.A146V | exon2  | NM_001134374 | 8  | 145095035 | c.437C>T  | 0.02 | 0.205 |
| SVIL     | O95425 | p.G532D | exon13 | NM_003174    | 10 | 29812670  | c.1595G>A | 0.22 | 0.001 |
| TBR1     | Q16650 | p.A547S | exon6  | NM_006593    | 2  | 162280328 | c.1639G>T | 1    | 0.002 |
| TLL2     | Q9Y6L7 | p.A302S | exon7  | NM_012465    | 10 | 98180732  | c.904G>T  | 0.04 | 0.892 |
| TMEM114  | B3SHH9 | p.S97L  | exon2  | NM_001146336 | 16 | 8619856   | c.290C>T  |      |       |
| TMEM132C | Q8N3T6 | p.A821T | exon9  | NM_001136103 | 12 | 129189974 | c.2461G>A | 0.45 |       |
| TP53     | P04637 | p.V172D | exon5  | NM_001126114 | 17 | 7578415   | c.515T>A  | 0    | 0.998 |
| UNC13C   | Q8NB66 | p.R182X | exon1  | NM_001080534 | 15 | 54305644  | c.544C>T  | 1    |       |
| USP6     | P35125 | p.I67M  | exon5  | NM_004505    | 17 | 5036210   | c.201T>G  | 0.22 | 0.369 |
| VEGF     | P15692 | p.F183L | exon1  | NM_001025369 | 6  | 43738992  | c.549T>G  | 0.02 | 0.991 |
| VGF      | O15240 | p.A325G | exon2  | NM_003378    | 7  | 100807151 | c.974C>G  | 0    | 0.512 |
| ZNF331   | Q9NQX6 | p.D10N  | exon4  | NM_001253801 | 19 | 54074876  | c.28G>A   | 0    | 0.547 |
| ZNF438   | Q7Z4V0 | p.Q594X | exon7  | NM_001143771 | 10 | 31137524  | c.1780C>T | 0.07 | 0.735 |
| ZNF717   | Q9BY31 | p.Y758F | exon5  | NM_001128223 | 3  | 75786501  | c.2273A>T | 0.4  |       |
| ZNF717   | Q9BY31 | p.H386Q | exon5  | NM_001128223 | 3  | 75787616  | c.1158C>G | 1    |       |
| ZXDA     | P98168 | p.S136T | exon1  | NM_007156    | X  | 57936449  | c.406T>A  | 0.6  | 0     |
| ZXDA     | P98168 | p.C135S | exon1  | NM_007156    | X  | 57936451  | c.404G>C  | 0.1  | 0.251 |

**Supplementary Table 5. SAAVs in NM & MT-share sample.**

| <b>Protein Variants</b> | <b>Accession number</b> | <b>Protein_Change</b> | <b>Exon</b> | <b>RefSeq</b> | <b>Chrs</b> | <b>Position</b> | <b>cDNA_Change</b> | <b>SIFT Score</b> | <b>PolyPhenV2</b> |
|-------------------------|-------------------------|-----------------------|-------------|---------------|-------------|-----------------|--------------------|-------------------|-------------------|
| A1BG                    | P04217                  | p.T278P               | exon5       | NM_130786     | 19          | 58862835        | c.832A>C           | 0                 | 0.735             |
| ADGRG6                  | Q86SQ4                  | p.W789C               | exon17      | NM_001032394  | 6           | 1.43E+08        | c.2367G>C          | 1                 | 0                 |
| AGTR2                   | P50052                  | p.R182X               | exon3       | NM_000686     | X           | 1.15E+08        | c.544C>T           | 0.01              | 0.004             |
| AKAP13                  | Q12802                  | p.T2795P              | exon36      | NM_006738     | 15          | 86287035        | c.8383A>C          | 0                 | 0.997             |
| ANAPC1                  | Q9H1A4                  | p.Q451H               | exon11      | NM_022662     | 2           | 1.13E+08        | c.1353G>C          | 0.95              | 0                 |
| APC2                    | O95996                  | p.F2256S              | exon15      | NM_005883     | 19          | 1470067         | c.6767T>C          | 0.13              | 0.728             |
| AQP7                    | O14520                  | p.E202D               | exon7       | NM_001170     | 9           | 33385784        | c.606G>C           | 0                 | 0.053             |
| ASB7                    | Q9H672                  | p.H91R                | exon5       | NM_024708     | 15          | 1.01E+08        | c.272A>G           | 0.37              |                   |
| ASL                     | P04424                  | p.E214D               | exon8       | NM_001024944  | 7           | 65552360        | c.642G>T           | 0.26              | 0.001             |
| ATP8A2                  | Q9NTI2                  | p.L624F               | exon22      | NM_016529     | 13          | 26153950        | c.1872G>T          | 0.02              | 0.899             |
| ATRNL1                  | Q5VV63                  | p.C961G               | exon18      | NM_207303     | 10          | 1.17E+08        | c.2881T>G          | 0                 | 1                 |
| BRD8                    | Q9H0E9                  | p.G298C               | exon10      | NM_006696     | 5           | 1.38E+08        | c.892G>T           | 1                 |                   |
| BTBD16                  | Q32M84                  | p.T297N               | exon10      | NM_144587     | 10          | 1.24E+08        | c.890C>A           | 0.07              | 0.206             |
| C20orf96                | Q9NUD7                  | p.P8H                 | exon2       | NM_153269     | 20          | 270946          | c.23C>A            | 0                 | 0.998             |
| C22orf39                | Q6P5X5                  | p.R25G                | exon1       | NM_001166242  | 22          | 19435250        | c.73C>G            | 0.98              | 0.999             |
| C2CD2                   | Q9Y426                  | p.A79G                | exon1       | NM_015500     | 21          | 43373522        | c.236C>G           | 0                 |                   |
| C2CD3                   | Q4AC94                  | p.Y1745D              | exon27      | NM_015531     | 11          | 73760510        | c.5233T>G          | 0.25              | 0.405             |
| CACNA1H                 | O95180                  | p.T1615P              | exon27      | NM_021098     | 16          | 1263845         | c.4843A>C          | 0                 |                   |
| CAPN12                  | Q6ZSI9                  | p.R413G               | exon10      | NM_144691     | 19          | 39227921        | c.1237C>G          | 0.41              | 0                 |
| CASK                    | O14936                  | p.G306C               | exon10      | NM_001126054  | X           | 41485956        | c.916G>T           | 0                 |                   |
| CCDC180                 | Q9P1Z9                  | p.L536M               | exon14      | NM_020893     | 9           | 1E+08           | c.1606C>A          | 0                 |                   |
| CCDC60                  | Q8IWA6                  | p.D33E                | exon2       | NM_178499     | 12          | 1.2E+08         | c.99C>A            | 0.09              |                   |
| CENPV                   | Q7Z7K6                  | p.S35G                | exon1       | NM_181716     | 17          | 16256648        | c.103A>G           | 0.13              | 0.693             |
| CFAP91                  | Q7Z4T9                  | p.Q533K               | exon13      | NM_033364     | 3           | 1.19E+08        | c.1597C>A          | 0                 | 0.992             |
| CFH                     | P08603                  | p.P346T               | exon8       | NM_000186     | 1           | 1.97E+08        | c.1036C>A          | 0.18              | 0.726             |

|         |        |          |         |              |    |          |           |      |       |
|---------|--------|----------|---------|--------------|----|----------|-----------|------|-------|
| CGNL1   | Q0VF96 | p.E898D  | exon11  | NM_001252335 | 15 | 57810674 | c.2694G>T | 0.83 | 0.027 |
| CHIT1   | Q13231 | p.A359G  | exon10  | NM_003465    | 1  | 2.03E+08 | c.1076C>G | 0    | 0.187 |
| CHIT1   | Q13231 | p.W358X  | exon10  | NM_003465    | 1  | 2.03E+08 | c.1073G>A | 0    | 0.999 |
| CLIP1   | P30622 | p.L271F  | exon5   | NM_198240    | 12 | 1.23E+08 | c.813G>T  |      | 0.998 |
| CMTR1   | Q8N1G2 | p.R672Q  | exon19  | NM_015050    | 6  | 37443167 | c.2015G>A | 0    | 0.999 |
| CNN3    | Q15417 | p.L65Q   | exon3   | NM_001839    | 1  | 95368730 | c.194T>A  | 0.01 | 0.989 |
| COL15A1 | P39059 | p.P653T  | exon15  | NM_001855    | 9  | 1.02E+08 | c.1957C>A | 0.09 | 0.951 |
| COL7A1  | Q02388 | p.S2564I | exon103 | NM_000094    | 3  | 48606284 | c.7691G>T | 0.01 | 0.783 |
| CRY2    | Q96524 | p.P508T  | exon11  | NM_001127457 | 11 | 45893705 | c.1522C>A | 0    | 0.727 |
| CUL1    | Q13616 | p.A467S  | exon13  | NM_003592    | 7  | 1.48E+08 | c.1399G>T | 0.2  | 0     |
| CYP2J2  | P51589 | p.W322C  | exon6   | NM_000775    | 1  | 60373495 | c.966G>T  | 0.02 | 0.89  |
| CYP4F2  | P78329 | p.T472A  | exon13  | NM_001082    | 19 | 15989730 | c.1414A>G | 0.01 |       |
| DBF4    | Q9UBU7 | p.E77D   | exon3   | NM_006716    | 7  | 87514305 | c.231A>C  | 0.05 | 0.717 |
| DMAP1   | Q9NPF5 | p.H362N  | exon10  | NM_001034023 | 1  | 44685721 | c.1084C>A | 0    |       |
| DOCK8   | Q8NF50 | p.Y1969X | exon45  | NM_001190458 | 9  | 463655   | c.5907C>A | 0    |       |
| DPP9    | Q86TI2 | p.T144A  | exon6   | NM_139159    | 19 | 4704313  | c.430A>G  | 0.05 |       |
| DPY19L1 | Q2PZI1 | p.P254H  | exon9   | NM_015283    | 7  | 35009079 | c.761C>A  | 0.03 | 0     |
| DSPP    | Q9NZW4 | p.N934D  | exon5   | NM_014208    | 4  | 88536614 | c.2800A>G | 0.75 | 0     |
| DYNC1H1 | Q14204 | p.D937E  | exon10  | NM_001376    | 14 | 1.02E+08 | c.2811C>A | 0    | 1     |
| EP400   | Q96L91 | p.H31P   | exon2   | NM_015409    | 12 | 1.32E+08 | c.92A>C   | 0    | 0.998 |
| EPPK1   | P58107 | p.R2239H | exon1   | NM_031308    | 8  | 1.45E+08 | c.6716G>A | 0    | 0.149 |
| ERN2    | Q76MJ5 | p.T202P  | exon6   | NM_033266    | 16 | 23718102 | c.604A>C  | 0.28 | 0     |
| FAM104B | Q5XKR9 | p.S51N   | exon3   | NM_001166700 | X  | 55172716 | c.152G>A  | 0.01 | 0.999 |
| FAM71D  | Q8N9W8 | p.A113E  | exon4   | NM_173526    | 14 | 67669989 | c.338C>A  | 0.07 | 0.125 |
| FERMT3  | Q86UX7 | p.V45G   | exon2   | NM_178443    | 11 | 63974970 | c.134T>G  | 0.01 | 0.003 |
| FDFT1   | P37268 | p.R110W  | exon5   | NM_004462    | 8  | 11809797 | c.328C>T  | 0.01 |       |
| FDFT1   | P37268 | p.Y174C  | exon7   | NM_004462    | 8  | 11826034 | c.521A>G  | 0.48 | 0.735 |
| FDFT1   | P37268 | p.N205S  | exon7   | NM_004462    | 8  | 11826127 | c.614A>G  | 0    | 1     |
| FDFT1   | P37268 | p.N215S  | exon7   | NM_004462    | 8  | 11826157 | c.644A>G  | 0.34 | 0.081 |
| FDFT1   | P37268 | p.R317W  | exon9   | NM_004462    | 8  | 11831587 | c.949C>T  | 0    | 0.489 |



|          |        |          |        |              |    |          |           |      |       |
|----------|--------|----------|--------|--------------|----|----------|-----------|------|-------|
| FDFT1    | P37268 | p.I345M  | exon10 | NM_004462    | 8  | 11838390 | c.1035T>G | 0    |       |
| FLG      | P20930 | p.T2235R | exon3  | NM_002016    | 1  | 1.52E+08 | c.6704C>G |      |       |
| FOXK1    | P85037 | p.T683P  | exon9  | NM_001037165 | 7  | 4801940  | c.2047A>C |      |       |
| FSTL1    | Q12841 | p.A7P    | exon2  | NM_007085    | 3  | 1.2E+08  | c.19G>C   | 0.03 | 0.02  |
| GAS8     | O95995 | p.S57G   | exon1  | NM_001214    | 16 | 90095582 | c.169A>G  | 0.04 | 0.001 |
| GAS8     | O95995 | p.V44A   | exon1  | NM_001214    | 16 | 90095620 | c.131T>C  | 0.51 | 0.253 |
| GBP7     | Q8N8V2 | p.T482S  | exon9  | NM_207398    | 1  | 89607253 | c.1444A>T | 0.03 |       |
| GCKR     | Q14397 | p.V102F  | exon4  | NM_001486    | 2  | 27721140 | c.304G>T  | 0.08 |       |
| GIGYF2   | Q6Y7W6 | p.P1211Q | exon26 | NM_001103148 | 2  | 2.34E+08 | c.3632C>A | 0.87 | 0.085 |
| GPER     | Q99527 | p.E218Q  | exon2  | NM_001505    | 7  | 1132016  | c.652G>C  | 0.49 | 0.291 |
| GSN      | P06396 | p.S511R  | exon14 | NM_001127664 | 9  | 1.24E+08 | c.1533C>A | 0    | 0.51  |
| HERC2    | O95714 | p.F544L  | exon13 | NM_004667    | 15 | 28511089 | c.1630T>C | 0    | 0.998 |
| HLA-A    | P30443 | p.A48S   | exon2  | NM_002116    | 6  | 29910602 | c.142G>T  | 0.01 | 0     |
| HLA-DRB1 | P01911 | p.H87L   | exon2  | NM_001243965 | 6  | 32551970 | c.260A>T  | 0.46 | 0     |
| HMCN1    | Q96RW7 | p.Y2941D | exon57 | NM_031935    | 1  | 1.86E+08 | c.8821T>G | 0    | 0.999 |
| HMX1     | P32339 | p.A269P  | exon2  | NM_018942    | 4  | 8869661  | c.805G>C  | 0.01 | 0.992 |
| HRCT1    | Q6UXD1 | p.R108H  | exon1  | NM_001039792 | 9  | 35906607 | c.323G>A  | 0.11 | 0     |
| IFNA7    | P01567 | p.V11L   | exon1  | NM_021057    | 9  | 21202134 | c.31G>T   | 0.45 | 0     |
| IFNK     | Q9P0W0 | p.V154F  | exon1  | NM_020124    | 9  | 27524794 | c.460G>T  | 0.22 | 0     |
| IGSF3    | O75054 | p.E446D  | exon7  | NM_001542    | 1  | 1.17E+08 | c.1338G>C | 0.19 | 0.589 |
| IGSF3    | O75054 | p.E434G  | exon7  | NM_001542    | 1  | 1.17E+08 | c.1301A>G | 0    | 0.997 |
| IGSF3    | O75054 | p.R680Q  | exon8  | NM_001542    | 1  | 1.17E+08 | c.2039G>A | 0.13 | 0.74  |
| IGSF9    | Q9P2J2 | p.C395X  | exon10 | NM_001135050 | 1  | 1.6E+08  | c.1185C>A | 0    |       |
| IQSEC2   | Q5JU85 | p.S1444P | exon15 | NM_001111125 | X  | 53263538 | c.4330T>C | 0.01 | 0.535 |
| ITGB4    | P16144 | p.Q478H  | exon12 | NM_001005731 | 17 | 73728300 | c.1434G>T | 0.1  | 0.001 |
| ITPR1    | Q14643 | p.G1159E | exon29 | NM_001099952 | 3  | 4725969  | c.3476G>A | 0    |       |
| KCNIP4   | Q6PIL6 | p.A5T    | exon1  | NM_025221    | 4  | 20884321 | c.13G>A   |      |       |
| KIAA0226 | RUBCN  | p.A943G  | exon20 | NM_014687    | 3  | 1.97E+08 | c.2828C>G | 0.17 | 0.042 |
| KIF18A   | Q8NI77 | p.R227H  | exon5  | NM_031217    | 11 | 28112183 | c.680G>A  | 0    | 0.557 |
| KMT2C    | Q8NEZ4 | p.R284Q  | exon7  | NM_170606    | 7  | 1.52E+08 | c.851G>A  | 0    | 0.957 |

|          |        |           |        |              |    |          |            |      |       |
|----------|--------|-----------|--------|--------------|----|----------|------------|------|-------|
| KMT2D    | O14686 | p.K2185N  | exon28 | NM_014727    | 19 | 36224005 | c.6555A>C  | 0.02 | 0.716 |
| KNL1     | Q8NG31 | p.S25X    | exon3  | NM_170589    | 15 | 40897346 | c.74C>A    | 0.29 |       |
| KRT4     | P19013 | p.G87A    | exon1  | NM_002272    | 12 | 53207583 | c.260G>C   | 0.3  |       |
| KRT8     | P05787 | p.M406I   | exon8  | NM_001256293 | 12 | 53292288 | c.1218G>T  | 0.18 | 0     |
| KRTAP4-3 | Q9BYR4 | p.S103T   | exon1  | NM_033187    | 17 | 39324117 | c.308G>C   | 0.07 | 0.988 |
| KRTAP4-8 | Q9BYQ9 | p.S68R    | exon1  | NM_031960    | 17 | 39254133 | c.204C>A   | 0.15 | 0.049 |
| KRTAP5-1 | Q6L8H4 | p.A166G   | exon1  | NM_001005922 | 11 | 1605983  | c.497C>G   | 0    | 0.925 |
| LILRA6   | Q6PI73 | p.Y350X   | exon6  | NM_024318    | 19 | 54744358 | c.1050T>G  | 0    | 0.394 |
| LILRB3   | O75022 | p.Q53L    | exon3  | NM_006864    | 19 | 54726347 | c.158A>T   | 0.02 | 0.205 |
| LILRB3   | O75022 | p.T6A     | exon1  | NM_006864    | 19 | 54726833 | c.16A>G    | 0.22 | 0.001 |
| MAGEB6   | Q8N7X4 | p.Y124S   | exon2  | NM_173523    | X  | 26212334 | c.371A>C   | 1    | 0.002 |
| MAGEC1   | O60732 | p.S185R   | exon4  | NM_005462    | X  | 1.41E+08 | c.555T>A   | 0.04 | 0.892 |
| MAGEC1   | O60732 | p.P189T   | exon4  | NM_005462    | X  | 1.41E+08 | c.565C>A   |      |       |
| MAP1B    | P46821 | p.D591E   | exon5  | NM_005909    | 5  | 71490955 | c.1773C>A  | 0.45 |       |
| MAP2K7   | O14733 | p.R276W   | exon7  | NM_145185    | 19 | 7976015  | c.826C>T   | 0    | 0.998 |
| MATR3    | P43243 | p.S807X   | exon14 | NM_001194955 | 5  | 1.39E+08 | c.2420C>A  | 1    |       |
| MEGF10   | Q96KG7 | p.G795S   | exon19 | NM_001256545 | 5  | 1.27E+08 | c.2383G>A  | 0.22 | 0.369 |
| MFSD14B  | Q5SR56 | p.F79V    | exon3  | NM_032558    | 9  | 97191501 | c.235T>G   | 0.02 | 0.991 |
| MTCL1    | Q9Y4B5 | p.N958K   | exon13 | NM_015210    | 18 | 8818975  | c.2874C>A  | 0    | 0.512 |
| MTHFR    | P42898 | p.L150M   | exon3  | NM_005957    | 1  | 11861245 | c.448C>A   | 0    | 0.547 |
| MTMR9    | Q96QG7 | p.R77X    | exon2  | NM_015458    | 8  | 11152749 | c.229C>T   | 0.07 | 0.735 |
| MUC16    | Q8WXI7 | p.K13414E | exon51 | NM_024690    | 19 | 9002576  | c.40240A>G | 0.4  |       |
| MUC4     | Q99102 | p.H3709Q  | exon2  | NM_018406    | 3  | 1.96E+08 | c.11127C>G | 1    |       |
| MUC4     | Q99102 | p.T3710A  | exon2  | NM_018406    | 3  | 1.96E+08 | c.11128A>G | 0.6  | 0     |
| MUC6     | Q6W4X9 | p.T1987P  | exon31 | NM_005961    | 11 | 1016842  | c.5959A>C  | 0.1  | 0.251 |
| MUC6     | Q6W4X9 | p.G1581E  | exon31 | NM_005961    | 11 | 1018059  | c.4742G>A  | 0.04 | 0.001 |
| UQCR5    | P47985 | p.R92H    | exon2  | NM_005961    | 13 | 29208098 | c.275G>A   | 0    | 0.735 |
| UQCR5    | P47985 | p.R177C   | exon2  | NM_005961    | 13 | 29207844 | c.529C>T   | 1    | 0     |
| NAF1     | Q96HR8 | p.D158Y   | exon2  | NM_138386    | 4  | 1.64E+08 | c.472G>T   | 0.01 | 0.004 |
| NFKB1    | P19838 | p.R186W   | exon7  | NM_001165412 | 4  | 1.03E+08 | c.556C>T   | 0    | 0.997 |

|          |        |          |        |              |    |          |           |      |       |
|----------|--------|----------|--------|--------------|----|----------|-----------|------|-------|
| NFKB1    | P19838 | p.E206X  | exon8  | NM_001165412 | 4  | 1.04E+08 | c.616G>T  | 0.95 | 0     |
| NKX2-8   | O15522 | p.V89G   | exon2  | NM_014360    | 14 | 37050561 | c.266T>G  | 0.13 | 0.728 |
| NOC4L    | Q9BVI4 | p.D292Y  | exon9  | NM_024078    | 12 | 1.33E+08 | c.874G>T  | 0    | 0.053 |
| NOTCH2NL | Q7Z3S9 | p.T158I  | exon4  | NM_203458    | 1  | 1.45E+08 | c.473C>T  | 0.37 |       |
| NPEPPS   | P55786 | p.S653I  | exon17 | NM_006310    | 17 | 45682781 | c.1958G>T | 0.26 | 0.001 |
| OR2L3    | Q8NG85 | p.G196C  | exon1  | NM_001004687 | 1  | 2.48E+08 | c.586G>T  | 0.02 | 0.899 |
| OR2T29   | Q8NH02 | p.S61T   | exon1  | NM_001004694 | 1  | 2.49E+08 | c.182G>C  | 0    | 1     |
| UQCR5    | P47985 | p.R177H  | exon2  | NM_006003    | 13 | 29207843 | c.530G>A  | 1    |       |
| UQCR5    | P47985 | p.D201H  | exon2  | NM_006003    | 13 | 29207772 | c.601G>C  | 0.07 | 0.206 |
| OR8U1    | Q8NH10 | p.H229R  | exon1  | NM_001005204 | 11 | 56143785 | c.686A>G  | 0    | 0.998 |
| OTOP1    | Q7RTM1 | p.K56R   | exon1  | NM_177998    | 4  | 4228425  | c.167A>G  | 0.98 | 0.999 |
| PABPC1   | P11940 | p.T48P   | exon1  | NM_002568    | 8  | 1.02E+08 | c.142A>C  | 0    |       |
| PAPLN    | O95428 | p.G620V  | exon15 | NM_173462    | 14 | 73726208 | c.1859G>T | 0.25 | 0.405 |
| PHF21A   | Q96BD5 | p.S324R  | exon9  | NM_001101802 | 11 | 45986887 | c.972C>A  | 0    |       |
| PIEZO2   | Q9H5I5 | p.S2546L | exon49 | NM_022068    | 18 | 10677849 | c.7637C>T | 0.41 | 0     |
| PLEKHA6  | Q9Y2H5 | p.A801D  | exon17 | NM_014935    | 1  | 2.04E+08 | c.2402C>A | 0    |       |
| PLIN4    | Q96Q06 | p.V661A  | exon3  | NM_001080400 | 19 | 4511948  | c.1982T>C | 0    |       |
| PLXNB3   | Q9ULL4 | p.A1010S | exon19 | NM_001163257 | X  | 1.53E+08 | c.3028G>T | 0.09 |       |
| POLR2E   | P19388 | p.V209G  | exon7  | NM_002695    | 19 | 1089492  | c.626T>G  | 0.13 | 0.693 |
| POLR3F   | Q9H1D9 | p.E315Q  | exon9  | NM_006466    | 20 | 18464194 | c.943G>C  | 0    | 0.992 |
| POT1     | Q9NUX5 | p.V52G   | exon8  | NM_001042594 | 7  | 1.24E+08 | c.155T>G  | 0.18 | 0.726 |
| POU4F2   | Q12837 | p.A168V  | exon2  | NM_004575    | 4  | 1.48E+08 | c.503C>T  | 0.83 | 0.027 |
| PRG4     | Q92954 | p.K482E  | exon5  | NM_001127709 | 1  | 1.86E+08 | c.1444A>G | 0    | 0.187 |
| PRG4     | Q92954 | p.T367A  | exon5  | NM_001127709 | 1  | 1.86E+08 | c.1099A>G | 0    | 0.999 |
| PRR21    | Q8WXC7 | p.G58S   | exon1  | NM_001080835 | 2  | 2.41E+08 | c.172G>A  |      | 0.998 |
| PRSS3    | P35030 | p.G208R  | exon5  | NM_002771    | 9  | 33799056 | c.622G>A  | 0    | 0.999 |
| PTAR1    | Q7Z6K3 | p.E110X  | exon4  | NM_001099666 | 9  | 72349166 | c.328G>T  | 0.01 | 0.989 |
| PTPN21   | Q16825 | p.Y569S  | exon13 | NM_007039    | 14 | 88946069 | c.1706A>C | 0.09 | 0.951 |
| RECQL4   | O94761 | p.S280N  | exon5  | NM_004260    | 8  | 1.46E+08 | c.839G>A  | 0.01 | 0.783 |
| ROBO1    | Q9Y6N7 | p.P683H  | exon15 | NM_002941    | 3  | 78711183 | c.2048C>A | 0    | 0.727 |

|          |        |          |        |              |    |          |            |      |       |
|----------|--------|----------|--------|--------------|----|----------|------------|------|-------|
| RTKN2    | Q8IZC4 | p.P413Q  | exon11 | NM_145307    | 10 | 63959569 | c.1238C>A  | 0.2  | 0     |
| SCRIB    | Q14160 | p.R733L  | exon17 | NM_015356    | 8  | 1.45E+08 | c.2198G>T  | 0.02 | 0.89  |
| SDK1     | Q7Z5N4 | p.T256P  | exon11 | NM_001079653 | 7  | 4247821  | c.766A>C   | 0.01 |       |
| SELENOT  | P62341 | p.G121V  | exon3  | NM_016275    | 3  | 1.5E+08  | c.362G>T   | 0.05 | 0.717 |
| SLC16A14 | Q7RTX9 | p.L92F   | exon3  | NM_152527    | 2  | 2.31E+08 | c.276G>T   | 0    |       |
| SLC2A3   | P11169 | p.E482G  | exon10 | NM_006931    | 12 | 8074055  | c.1445A>G  | 0    |       |
| SLC7A7   | Q9UM01 | p.S386R  | exon9  | NM_001126106 | 14 | 23243650 | c.1158C>A  | 0.05 |       |
| SLC9A3R1 | O14745 | p.V60G   | exon1  | NM_004252    | 17 | 72745164 | c.179T>G   | 0.03 | 0     |
| SMPD4    | Q9NXE4 | p.F484V  | exon15 | NM_017951    | 2  | 1.31E+08 | c.1450T>G  | 0.75 | 0     |
| SNED1    | Q8TER0 | p.T1241P | exon25 | NM_001080437 | 2  | 2.42E+08 | c.3721A>C  | 0    | 1     |
| SNRNP40  | Q96DI7 | p.A57S   | exon2  | NM_004814    | 1  | 31766168 | c.169G>T   | 0    | 0.998 |
| SOGA3    | Q5TF21 | p.E212G  | exon2  | NM_001012279 | 6  | 1.28E+08 | c.635A>G   | 0    | 0.149 |
| SORCS2   | Q96PQ0 | p.L181M  | exon2  | NM_020777    | 4  | 7398075  | c.541C>A   | 0.28 | 0     |
| SPEG     | Q15772 | p.T3254P | exon41 | NM_005876    | 2  | 2.2E+08  | c.9760A>C  | 0.01 | 0.999 |
| SPPL3    | Q8TCT6 | p.R182P  | exon7  | NM_139015    | 12 | 1.21E+08 | c.545G>C   | 0.07 | 0.125 |
| SSC5D    | A1L4H1 | p.Y1312H | exon14 | NM_001144950 | 19 | 56029577 | c.3934T>C  | 0.01 | 0.003 |
| SSPO     | A2VEC9 | p.G3700R | exon78 | NM_198455    | 7  | 1.5E+08  | c.11098G>C | 0.01 |       |
| STK4     | Q13043 | p.P19S   | exon1  | NM_020998    | 3  | 49726070 | c.55C>T    | 0.48 | 0.735 |
| SVEP1    | Q4LDE5 | p.A634D  | exon9  | NM_153366    | 9  | 1.13E+08 | c.1901C>A  | 0    | 1     |
| TAS2R31  | P59538 | p.E151Q  | exon1  | NM_176885    | 12 | 11183484 | c.451G>C   | 0.34 | 0.081 |
| TBC1D22B | Q9NU19 | p.S224X  | exon5  | NM_017772    | 6  | 37250727 | c.671C>A   | 0    | 0.489 |
| TBX21    | Q9UL17 | p.T180P  | exon2  | NM_013351    | 17 | 45820022 | c.538A>C   | 0    |       |
| TIGAR    | Q9NQ88 | p.L217F  | exon6  | NM_020375    | 12 | 4461695  | c.651A>C   |      |       |
| TLL2     | Q9Y6L7 | p.C588G  | exon14 | NM_012465    | 10 | 98146800 | c.1762T>G  |      |       |
| TMCO3    | Q6UWJ1 | p.S109Y  | exon2  | NM_017905    | 13 | 1.14E+08 | c.326C>A   | 0.03 | 0.02  |
| TMEM128  | Q5BJH2 | p.V134I  | exon4  | NM_032927    | 4  | 4239589  | c.400G>A   | 0.04 | 0.001 |
| TMEM259  | Q4ZIN3 | p.A387P  | exon9  | NM_001033026 | 19 | 1011424  | c.1159G>C  | 0.51 | 0.253 |
| TMEM268  | Q5VZI3 | p.Q270K  | exon8  | NM_153045    | 9  | 1.17E+08 | c.808C>A   | 0.03 |       |
| TMTC1    | Q8IUR5 | p.Y41X   | exon1  | NM_001193451 | 12 | 29936562 | c.123C>A   | 0.08 |       |
| TMTC2    | Q8N394 | p.R139G  | exon2  | NM_152588    | 12 | 83251120 | c.415C>G   | 0.87 | 0.085 |

|         |        |          |        |              |    |          |            |      |       |
|---------|--------|----------|--------|--------------|----|----------|------------|------|-------|
| TNPO1   | Q92973 | p.R805T  | exon22 | NM_153188    | 5  | 72196824 | c.2414G>C  | 0.49 | 0.291 |
| TPSD1   | Q9BZJ3 | p.I87V   | exon3  | NM_012217    | 16 | 1306802  | c.259A>G   | 0    | 0.51  |
| TREML2  | Q5T2D2 | p.V50M   | exon2  | NM_024807    | 6  | 41166075 | c.148G>A   | 0    | 0.998 |
| TRIM65  | Q6PJ69 | p.A132S  | exon1  | NM_173547    | 17 | 73892625 | c.394G>T   | 0.01 | 0     |
| TRIM72  | Q6ZMU5 | p.P320L  | exon7  | NM_001008274 | 16 | 31235601 | c.959C>T   | 0.46 | 0     |
| TTC37   | Q6PGP7 | p.A830S  | exon23 | NM_014639    | 5  | 94852403 | c.2488G>T  | 0    | 0.999 |
| UBE2D1  | P51668 | p.Q34K   | exon3  | NM_003338    | 10 | 60121266 | c.100C>A   | 0.01 | 0.992 |
| UBR4    | Q5T4S7 | p.Q3358K | exon68 | NM_020765    | 1  | 19447752 | c.10072C>A | 0.11 | 0     |
| UBXN11  | Q5T124 | p.G372S  | exon11 | NM_001077262 | 1  | 26608879 | c.1114G>A  | 0.45 | 0     |
| UNC13D  | Q70J99 | p.V63F   | exon3  | NM_199242    | 17 | 73839314 | c.187G>T   | 0.22 | 0     |
| UNC5B   | Q8IZJ1 | p.R755H  | exon14 | NM_170744    | 10 | 73055656 | c.2264G>A  | 0.19 | 0.589 |
| USB1    | Q9BQ65 | p.H208N  | exon6  | NM_024598    | 16 | 58052888 | c.622C>A   | 0    | 0.997 |
| USP43   | Q70EL4 | p.G739R  | exon14 | NM_153210    | 17 | 9615329  | c.2215G>C  | 0.13 | 0.74  |
| USP8    | P40818 | p.R763W  | exon16 | NM_001128611 | 15 | 50784950 | c.2287C>T  | 0    |       |
| USP8    | P40818 | p.N764K  | exon16 | NM_001128611 | 15 | 50784955 | c.2292C>A  | 0.01 | 0.535 |
| VGf     | O15240 | p.A325G  | exon2  | NM_003378    | 7  | 1.01E+08 | c.974C>G   | 0.1  | 0.001 |
| VPS39   | Q96JC1 | p.R650L  | exon19 | NM_015289    | 15 | 42456633 | c.1949G>T  | 0    |       |
| WDR88   | Q6ZMY6 | p.L72F   | exon1  | NM_173479    | 19 | 33623291 | c.216G>T   |      |       |
| WNK2    | Q9Y3S1 | p.V1801G | exon22 | NM_006648    | 9  | 96055149 | c.5402T>G  | 0.17 | 0.042 |
| ZBTB48  | P10074 | p.H425Y  | exon7  | NM_005341    | 1  | 6647586  | c.1273C>T  | 0    | 0.551 |
| ZBTB9   | Q96C00 | p.R109P  | exon2  | NM_152735    | 6  | 33423203 | c.326G>C   | 0    | 0.957 |
| ZFPM1   | Q8IX07 | p.E444D  | exon10 | NM_153813    | 16 | 88599698 | c.1332G>C  | 0.02 | 0.716 |
| ZNF185  | O15231 | p.D400Y  | exon15 | NM_007150    | X  | 1.52E+08 | c.1198G>T  | 0.29 |       |
| ZNF2    | Q9BSG1 | p.E17K   | exon3  | NM_021088    | 2  | 95843243 | c.49G>A    | 0.3  |       |
| ZNF492  | Q9P255 | p.A40T   | exon3  | NM_020855    | 19 | 22836805 | c.118G>A   | 0.18 | 0     |
| ZNF717  | Q9BY31 | p.M51I   | exon3  | NM_001128223 | 3  | 75790792 | c.153G>T   | 0.07 | 0.988 |
| ZNF83   | P51522 | p.A277V  | exon4  | NM_001105552 | 19 | 53116988 | c.830C>T   | 0.15 | 0.049 |
| ZSCAN18 | Q8TBC5 | p.S224T  | exon3  | NM_001145542 | 19 | 58600105 | c.671G>C   | 0    | 0.925 |

Supplementary Table 6. SAAVs in MT-specific sample.

| Protein Variants | Accession number | Protein_Change | Chrs | Exon   | Position | cDNA_Change | SIFT Score | PolyPhenV2 |
|------------------|------------------|----------------|------|--------|----------|-------------|------------|------------|
| ABCA7            | Q8IZY2           | p.T1883M       | 19   | exon42 | 1062248  | c.5648C>T   | 0          | 0.999      |
| ACTN1            | P12814           | p.Q634H        | 14   | exon16 | 69349226 | c.1902G>T   | 0.04       | 0.007      |
| AEBP2            | Q6ZN18           | p.C297X        | 12   | exon3  | 19626193 | c.891C>A    | 0          |            |
| AFF1             | P51825           | p.Q733K        | 4    | exon12 | 88036182 | c.2197C>A   | 0.55       | 0.444      |
| ANKRD33B         | A6NCL7           | p.Q115P        | 5    | exon1  | 10564923 | c.344A>C    | 0.1        |            |
| ANKS1A           | Q92625           | p.G49S         | 6    | exon1  | 34857324 | c.145G>A    | 0.65       | 0          |
| APC              | P25054           | p.Q775X        | 5    | exon14 | 1.12E+08 | c.2323C>T   | 0.17       | 0.733      |
| ARMC12           | Q5T9G4           | p.L172P        | 6    | exon3  | 35706285 | c.515T>C    | 0.12       | 0.877      |
| ASTN2            | O75129           | p.A226S        | 9    | exon5  | 1.19E+08 | c.676G>T    | 0.01       | 0.445      |
| BRE              | O75150           | p.T284R        | 2    | exon10 | 28464260 | c.851C>G    | 0.06       | 0.121      |
| BTRC             | Q9Y297           | p.L556F        | 10   | exon13 | 1.03E+08 | c.1666C>T   | 0.32       | 0          |
| C16orf62         | Q7Z3J2           | p.V71G         | 16   | exon1  | 19566996 | c.212T>G    | 0          |            |
| CACHD1           | Q5VU97           | p.I1035M       | 1    | exon24 | 65145291 | c.3105C>G   | 0.24       | 0.032      |
| CASKIN2          | Q8WXE0           | p.E487G        | 17   | exon14 | 73500303 | c.1460A>G   | 0          | 0.932      |
| CCDC63           | Q8NA47           | p.D13N         | 12   | exon3  | 1.11E+08 | c.37G>A     | 0.41       | 0.006      |
| CES5A            | Q6NT32           | p.E475K        | 16   | exon11 | 55883536 | c.1423G>A   | 0.41       |            |
| CNTD1            | Q8N815           | p.Q94K         | 17   | exon3  | 40956277 | c.280C>A    | 0.75       | 0.365      |
| CNTN5            | O94779           | p.R53X         | 11   | exon4  | 99690376 | c.157C>T    | 1          |            |
| COL5A2           | P05997           | p.G321V        | 2    | exon15 | 1.9E+08  | c.962G>T    | 0          | 0.996      |
| COPS6            | Q7L5N1           | p.T294S        | 7    | exon10 | 99689309 | c.881C>G    | 0.01       | 0.002      |
| COPZ2            | Q9P299           | p.G22A         | 17   | exon1  | 46115075 | c.65G>C     |            |            |
| CRELD2           | Q6UXH1           | p.A243T        | 22   | exon7  | 50316920 | c.727G>A    | 0.35       | 0.023      |
| CUBN             | O60494           | p.L2370I       | 10   | exon46 | 16957922 | c.7108C>A   | 0.23       | 0.085      |
| CYP27B1          | O15528           | p.D418E        | 12   | exon8  | 58157553 | c.1254C>A   | 0.02       | 0.998      |
| DDX51            | Q8N8A6           | p.G114E        | 12   | exon2  | 1.33E+08 | c.341G>A    | 0.45       | 0.001      |
| DIAPH2           | O60879           | p.L751I        | X    | exon20 | 96354696 | c.2251C>A   | 0.01       | 0.782      |
| DPP6             | P42658           | p.A20T         | 7    | exon1  | 1.54E+08 | c.58G>A     | 0.01       |            |
| DPYSL3           | Q14195           | p.P305T        | 5    | exon9  | 1.47E+08 | c.913C>A    | 0          | 1          |

|         |        |          |    |        |          |           |      |       |
|---------|--------|----------|----|--------|----------|-----------|------|-------|
| DRP2    | Q13474 | p.R492W  | X  | exon14 | 1.01E+08 | c.1474C>T | 0    | 1     |
| EIF5AL1 | Q6IS14 | p.V137L  | 10 | exon1  | 81272814 | c.409G>C  |      |       |
| ELL2    | O00472 | p.G161V  | 5  | exon5  | 95242486 | c.482G>T  | 0.06 | 0.932 |
| EMB     | Q6PCB8 | p.D95Y   | 5  | exon3  | 49707131 | c.283G>T  | 0.01 | 0.838 |
| ESYT1   | Q9BSJ8 | p.D1097E | 12 | exon31 | 56537622 | c.3291C>A | 0.47 | 0.875 |
| FAM104B | Q5XKR9 | p.E40V   | X  | exon2  | 55185563 | c.119A>T  | 0    | 0.849 |
| FAM131C | Q96AQ9 | p.R107Q  | 1  | exon5  | 16386495 | c.320G>A  | 0.92 | 0.998 |
| FAM135B | Q49AJ0 | p.V67M   | 8  | exon4  | 1.39E+08 | c.199G>A  | 0    | 0.762 |
| FAM26F  | Q5R3K3 | p.A107V  | 6  | exon2  | 1.17E+08 | c.320C>T  | 0.56 | 0.01  |
| FBXL6   | Q8N531 | p.R402Q  | 8  | exon7  | 1.46E+08 | c.1205G>A | 0.5  | 0     |
| FOXH1   | O75593 | p.W77R   | 8  | exon2  | 1.46E+08 | c.229T>A  | 0    | 1     |
| FOXRED1 | Q96CU9 | p.Y325D  | 11 | exon9  | 1.26E+08 | c.973T>G  | 0    | 0.621 |
| FRAS1   | Q86XX4 | p.P2606T | 4  | exon54 | 79396725 | c.7816C>A | 0.14 |       |
| FRY     | Q5TBA9 | p.R1875Q | 13 | exon42 | 32808807 | c.5624G>A | 0    | 1     |
| FZD8    | Q9H461 | p.P644R  | 10 | exon1  | 35928427 | c.1931C>G | 0.08 | 0.011 |
| GABBR2  | O75899 | p.Q386X  | 9  | exon7  | 1.01E+08 | c.1156C>T | 1    | 0.735 |
| GCC1    | Q96CN9 | p.V699A  | 7  | exon2  | 1.27E+08 | c.2096T>C | 0.01 | 0.024 |
| GCNT4   | Q9P109 | p.R388Q  | 5  | exon1  | 74324700 | c.1163G>A | 0    | 1     |
| GEMIN2  | O14893 | p.C221F  | 14 | exon8  | 39601190 | c.662G>T  | 0    | 1     |
| GPR150  | Q8NGU9 | p.P202A  | 5  | exon1  | 94956583 | c.604C>G  | 0.15 | 0.063 |
| GREB1   | Q4ZG55 | p.S1598I | 2  | exon27 | 11772216 | c.4793G>T | 0.05 | 0.485 |
| GRIK3   | Q13003 | p.L386F  | 1  | exon8  | 37319270 | c.1158G>T | 0.27 | 0.954 |
| GXYLT1  | Q4G148 | p.D153V  | 12 | exon3  | 42512830 | c.458A>T  | 0.01 | 0.957 |
| GXYLT1  | Q4G148 | p.H148Q  | 12 | exon3  | 42512844 | c.444T>G  | 0.04 | 0.999 |
| HOXA3   | O43365 | p.S354I  | 7  | exon3  | 27147805 | c.1061G>T | 0.01 | 0.737 |
| HR      | O43593 | p.L673M  | 8  | exon8  | 21980110 | c.2017C>A | 0.03 | 0.191 |
| HS6ST1  | O60243 | p.D87E   | 2  | exon1  | 1.29E+08 | c.261C>A  | 0.02 | 0.999 |
| IGFBP2  | P18065 | p.L22P   | 2  | exon1  | 2.17E+08 | c.65T>C   | 0.1  | 0.483 |
| IGSF3   | O75054 | p.E434G  | 1  | exon7  | 1.17E+08 | c.1301A>G | 0.11 | 0.067 |
| KAZN    | Q674X7 | p.S310T  | 1  | exon6  | 15386680 | c.929G>C  | 0    | 0.664 |
| KCNK18  | Q7Z418 | p.L258F  | 10 | exon3  | 1.19E+08 | c.774G>T  | 0.33 | 0.024 |
| KCNT2   | Q6UVM3 | p.A176S  | 1  | exon7  | 1.96E+08 | c.526G>T  | 0.28 | 0     |
| KIF25   | Q9UIL4 | p.C220X  | 6  | exon7  | 1.68E+08 | c.660C>A  | 0.08 | 0.395 |
| KLF11   | O14901 | p.D2N    | 2  | exon2  | 10186289 | c.4G>A    | 0.01 | 0.99  |

|          |        |          |    |        |          |           |      |        |
|----------|--------|----------|----|--------|----------|-----------|------|--------|
| KRT4     | P19013 | p.G87A   | 12 | exon1  | 53207583 | c.260G>C  | 0.54 | 0.406  |
| LILRA6   | Q6PI73 | p.Y350X  | 19 | exon6  | 54744358 | c.1050T>G | 0.57 | 0.4011 |
| MAP2K3   | P46734 | p.L186W  | 17 | exon8  | 21207813 | c.557T>G  | 0    | 1      |
| MAPKAP1  | Q9BPZ7 | p.M46I   | 9  | exon2  | 1.28E+08 | c.138G>T  | 0.3  | 0.002  |
| MARK2    | Q7KZI7 | p.D338E  | 11 | exon12 | 63669681 | c.1014C>A | 0.04 | 0.003  |
| MAS1L    | P35410 | p.C194F  | 6  | exon1  | 29455099 | c.581G>T  | 0    | 1      |
| MCC      | P23508 | p.G18S   | 5  | exon1  | 1.13E+08 | c.52G>A   | 0    | 0.221  |
| MCTP1    | Q6DN14 | p.L129F  | 5  | exon4  | 94278063 | c.387G>T  | 0    | 0.926  |
| MICAL2   | O94851 | p.L99F   | 11 | exon4  | 12225829 | c.297G>T  | 0.03 | 0.057  |
| MICAL2   | O94851 | p.L99F   | 11 | exon4  | 12225829 | c.297G>T  | 0.03 | 0.057  |
| MIR205HG | G1QLW0 | p.R98G   | 1  | exon4  | 2.1E+08  | c.292A>G  |      |        |
| MITF     | O75030 | p.A258T  | 3  | exon8  | 70008503 | c.772G>A  | 0.17 | 0      |
| KMT2C    | Q8NEZ4 | p.N729D  | 7  | exon14 | 1.52E+08 | c.2185A>G | 0.47 | 0      |
| KMT2C    | Q8NEZ4 | p.S730Y  | 7  | exon14 | 1.52E+08 | c.2189C>A | 0.1  | 0.011  |
| MPG      | P29372 | p.R12W   | 16 | exon2  | 129433   | c.34C>T   | 0    | 0.986  |
| MUC12    | A1L198 | p.D868N  | 7  | exon2  | 1.01E+08 | c.2602G>A |      |        |
| MUC2     | Q02817 | p.P1495T | 11 | exon30 | 1092664  | c.4483C>A | 0.35 |        |
| MUC2     | Q02817 | p.T1498S | 11 | exon30 | 1092674  | c.4493C>G | 0.77 |        |
| MUC2     | Q02817 | p.S1513T | 11 | exon30 | 1092719  | c.4538G>C | 0.89 |        |
| NIPBL    | Q6KC79 | p.L1257I | 5  | exon16 | 37003363 | c.3769C>A | 1    | 0      |
| NKX2-8   | O15522 | p.V89G   | 14 | exon2  | 37050561 | c.266T>G  | 0    | 0.995  |
| NRXN2    | P58401 | p.Q256R  | 11 | exon5  | 64390493 | c.767A>G  | 0.39 | 0.005  |
| OBSCN    | Q5VST9 | p.A1274G | 1  | exon13 | 2.28E+08 | c.3821C>G |      |        |
| OR2T27   | Q8NH04 | p.Y120C  | 1  | exon1  | 2.49E+08 | c.359A>G  | 0.02 | 0.999  |
| OTOP1    | Q7RTM1 | p.K56R   | 4  | exon1  | 4228425  | c.167A>G  | 0    | 0.98   |
| PCMTD1   | Q96MG8 | p.K307E  | 8  | exon6  | 52733066 | c.919A>G  | 0.97 | 0      |
| JADE3    | Q92613 | p.R137C  | X  | exon5  | 46884250 | c.409C>T  | 0    | 0.371  |
| KLHL23   | F7D1B4 | p.R52X   | 2  | exon4  | 1.71E+08 | c.154C>T  | 1    | 0.724  |
| PITRM1   | Q8K411 | p.Q59P   | 10 | exon3  | 3208567  | c.176A>C  | 0.22 |        |
| PKMYT1   | Q99640 | p.R81W   | 16 | exon3  | 3026802  | c.241C>T  | 0.01 | 0.512  |
| PKN3     | Q6P5Z2 | p.L705I  | 9  | exon18 | 1.31E+08 | c.2113C>A | 0    | 0.785  |
| PLEKHN1  | Q494U1 | p.E331G  | 1  | exon10 | 907758   | c.992A>G  | 0.36 | 0      |
| PLIN4    | Q96Q06 | p.G736R  | 19 | exon3  | 4511724  | c.2206G>C | 0.33 |        |
| PLIN4    | Q96Q06 | p.V661A  | 19 | exon3  | 4511948  | c.1982T>C | 0.29 |        |



|         |        |          |    |        |          |           |      |       |
|---------|--------|----------|----|--------|----------|-----------|------|-------|
| POLR2E  | P19388 | p.V209G  | 19 | exon7  | 1089492  | c.626T>G  | 0    | 0.961 |
| POLRMT  | O00411 | p.G923C  | 19 | exon12 | 620077   | c.2767G>T | 0    | 1     |
| PPP1R3A | Q16821 | p.E292D  | 7  | exon3  | 1.14E+08 | c.876G>C  | 0.03 | 0.104 |
| RBMXL1  | Q96E39 | p.K9N    | 1  | exon2  | 89449483 | c.27G>C   | 0    | 0.11  |
| RBMXL3  | Q8N7X1 | p.R393G  | X  | exon1  | 1.14E+08 | c.1177A>G |      |       |
| RERE    | Q9P2R6 | p.S1019P | 1  | exon19 | 8420512  | c.3055T>C | 0.24 | 0.263 |
| RERE    | Q9P2R6 | p.A1018P | 1  | exon19 | 8420515  | c.3052G>C | 0.04 | 0.401 |
| RP1L1   | Q8IWN7 | p.E1305G | 8  | exon4  | 10467694 | c.3914A>G | 0.01 | 0.462 |
| SAA1    | P0DJI8 | p.A56S   | 11 | exon3  | 18290816 | c.166G>T  | 0    | 0.003 |
| SFI1    | A8K8P3 | p.S237R  | 22 | exon8  | 31957324 | c.711C>A  | 0.3  | 0.11  |
| SFRP4   | Q6FHJ7 | p.K324N  | 7  | exon6  | 37947150 | c.972A>C  | 0.05 | 0.514 |
| SIRT6   | Q8N6T7 | p.R291P  | 19 | exon8  | 4174810  | c.872G>C  | 0.15 | 0.989 |
| SRGAP3  | O43295 | p.A510S  | 3  | exon12 | 9074345  | c.1528G>T | 0.82 | 0     |
| STARD8  | Q92502 | p.P918T  | X  | exon12 | 67943660 | c.2752C>A | 0    | 0.997 |
| STK19   | P49842 | p.S307G  | 6  | exon7  | 31948448 | c.919A>G  | 0.11 | 0     |
| SZT2    | Q5T011 | p.P919H  | 1  | exon19 | 43891255 | c.2756C>A | 0.09 | 0.998 |
| TAS2R19 | P59542 | p.F290S  | 12 | exon1  | 11174302 | c.869T>C  | 0.07 | 0.298 |
| TAS2R19 | P59542 | p.F290S  | 12 | exon1  | 11174302 | c.869T>C  | 0.07 | 0.298 |
| TBCD    | Q9BTW9 | p.A422E  | 17 | exon13 | 80772757 | c.1265C>A | 0    |       |
| TBL1X   | O60907 | p.D516N  | X  | exon17 | 9683035  | c.1546G>A | 0.39 | 0.034 |
| TCEAL5  | Q5H9L2 | p.D82E   | X  | exon3  | 1.03E+08 | c.246C>A  | 0.02 | 0     |
| TCF7    | P36402 | p.R339W  | 5  | exon8  | 1.33E+08 | c.1015C>T | 0    | 1     |
| TCHH    | Q07283 | p.L507V  | 1  | exon2  | 1.52E+08 | c.1519C>G |      | 0.363 |
| TFAP2A  | P05549 | p.N50H   | 6  | exon2  | 10410466 | c.148A>C  | 0.02 | 0.899 |
| TMEM163 | Q8TC26 | p.I157L  | 2  | exon5  | 1.35E+08 | c.469A>C  | 0.34 | 0.366 |
| TPRX1   | Q8N7U7 | p.S244P  | 19 | exon2  | 48305538 | c.730T>C  | 0.37 | 0.164 |
| TRIM49C | P0CI26 | p.S298N  | 11 | exon8  | 89774252 | c.893G>A  | 1    |       |
| TRPC4AP | Q8TEL6 | p.C438F  | 20 | exon10 | 33603824 | c.1313G>T | 0    | 1     |
| TSHR    | P16473 | p.T441P  | 14 | exon10 | 81609723 | c.1321A>C | 0    | 0.999 |
| TSHZ1   | Q6ZSZ6 | p.T112P  | 18 | exon2  | 72997831 | c.334A>C  | 0.02 | 0.025 |
| TTC37   | Q6PGP7 | p.G515X  | 5  | exon17 | 94859448 | c.1543G>T | 0.49 | 0.735 |
| TXNRD2  | Q9NNW7 | p.M263I  | 22 | exon11 | 19883090 | c.789G>T  | 0.26 | 0.067 |
| TXNRD2  | Q9NNW7 | p.V162F  | 22 | exon6  | 19903332 | c.484G>T  | 0.01 | 0     |
| UNKL    | Q9H9P5 | p.G443C  | 16 | exon11 | 1421541  | c.1327G>T | 0.07 |       |

|        |        |          |    |        |          |            |      |       |
|--------|--------|----------|----|--------|----------|------------|------|-------|
| VANGL1 | Q8TAA9 | p.S336X  | 1  | exon6  | 1.16E+08 | c.1007C>A  | 0.01 | 0.735 |
| VEGF   | P15692 | p.H218Q  | 6  | exon2  | 43742125 | c.654C>A   | 0.08 | 0.831 |
| VPS13D | Q5THJ4 | p.T3861N | 1  | exon60 | 12460260 | c.11582C>A | 0.05 | 0.453 |
| VPS37A | Q8NEZ2 | p.A386E  | 8  | exon11 | 17143899 | c.1157C>A  | 0.04 | 0.004 |
| ZBTB45 | Q96K62 | p.T138P  | 19 | exon2  | 59028629 | c.412A>C   | 0.96 | 0     |
| ZFP1   | Q6P2D0 | p.E297K  | 16 | exon4  | 75203897 | c.889G>A   | 0.29 | 0.956 |
| ZNF141 | Q15928 | p.E315K  | 4  | exon4  | 367169   | c.943G>A   | 0.06 | 0.13  |
| ZNF410 | Q86VK4 | p.A90S   | 14 | exon5  | 74363066 | c.268G>T   | 0    | 0.001 |
| ZNHIT1 | O43257 | p.R114C  | 7  | exon4  | 1.01E+08 | c.340C>T   | 0    | 1     |
| ZP3    | P21754 | p.H287R  | 7  | exon8  | 76069881 | c.860A>G   | 0.15 | 0.046 |

---

## **Extended Experimental Procedures**

### **Patient specimen acquisition**

The study was examined and approved by the Ethics Committee of the Shanghai Tenth People's Hospital, Tongji University School of Medicine (SHSY-IEC-PAP-16-24). This study was registered with ClinicalTrials.gov, number NCT02917707. Follow-up data and statistics were recorded for all patients through Dec. 31, 2017.

### **DNA and RNA extraction.**

Using a co-isolation protocol, DNA and RNA were purified simultaneously using the QIAGEN All Prep DNA/RNA Micro Kit (Qiagen, CA, USA) according to the manufacturer's instructions [1]. The nucleic acid concentration was determined using a Nanodrop1000 spectrophotometer (Thermo Fisher Scientific; Waltham, MA, USA) [2], and the RNA purity was verified using 1.5% denaturing agarose gels.

### **Protein extraction and analysis by LC-MS/MS.**

Forty four paired fresh primary tumors from the colorectal and paired normal colorectal tissues (PN) independently confirmed by two experienced pathologists Z.Y.C. and H.Q.Y., were used for proteogenomic analysis (Table S1). Three different parts of the same lesions for every sample were compared for data analysis and measurement of the variation caused by random biological effects. The tissues were homogenized in 4 % SDS and 0.1 M DTT in 0.1 M Tris-HCl, pH 7.6 on ice, sonicated 10 times (80 w; 10 s sonication/5 s suspension), incubated for 3 min at 95 °C, and briefly sonicated. The protein concentrations of clarified lysates were determined using a fluorescence assay and then 200 µg of clarified lysates were proteolyzed on a 10 kDa filter (PALL Life Sciences, Shanghai, China) using the filter-aided sample preparation method [3]. The peptide samples were then desalted onto a solid-phase extraction cartridge. The lyophilized peptide mixture was re-suspended in water with 0.1% formic acid (v/v), and its content was estimated by ultraviolet light spectral density at 280 nm [4]. Then, 3 µg of the digest sample was analyzed by

nano-liquid chromatography-tandem mass spectrometry on a LTQ Orbitrap Velos Pro mass spectrometer as previously described [5].

The acquired data from mass spectrometry runs were combined and searched against the UniProt Human database (05/2016, 153652 entries) using Maxquant software (version 1.3.0.5; <http://maxquant.org/>) as described [6]. Proteins were identified using the Andromeda peptide search engine integrated into the Maxquant platform [7]. The required minimum peptide length for identification was 7 amino acids, and the false discovery rate at the protein level, peptide level and site were set to 0.01. The normalized spectral protein intensity values were calculated for each protein group.

The Maxquant peptide and protein quantification results files were imported into Perseus software (version 1.5.1.6) to identify the differentially expressed proteins [8-10]. After importing the quantitative data from ProteinGroups.txt into Perseus, a filtering criterion is set to keep the identified proteins with the quantified values of all ten reporter ions (no missing value) in the final identification list. The protein intensities are  $\log_2$ -transformed and normalized by subtracting the median intensity in each column/sample. Principal component analysis (PCA) is performed based on protein intensities to differentiate groups [11]. Two-samples t-tests coupled with Benjamini–Hochberg (FDR cutoff of 0.05) correction are performed to identify the differentially expressed proteins [12].

### **Validation of point mutations by PCR and Sanger sequencing.**

The reliability of the exome analysis and somatic variant identification strategies was assessed using PCR and Sanger sequencing. PCR was performed using the GeneAmp PCR System 9700 (Applied Biosystems, Foster City, CA, USA). About 20 ng template DNA from each sample was used per reaction. The products were sequenced, and all sequences were analyzed with the Sequencing Analysis Software Version 5.2 (Applied Biosystems) [13].

### **RNA sequencing analysis.**

Of the 44 samples described in this study, 9 specimens from 3 CRC patients with metastasis (comprised of triplet sets of PN, primary MT, and synchronously matched liver metastases sample) and 3 specimens from 3 CRC patients without liver metastasis were obtained for RNA sequencing analysis. The mRNA libraries were separately generated from total RNA and constructed according to the standard Illumina RNA library preparation protocol (Illumina Inc, USA) [14]. Sequencing was performed on the Illumina Nextseq 500 platform according to the manufacturer's instructions [15]. Images generated by Nextseq 500 were converted into nucleotide sequences using a base call pipeline and stored in FASTQ format, and the raw reads were filtered prior to analyzing the data [16]. Clean reads were mapped to reference Homo sapiens transcriptome sequences from the UCSC website (hg19) using Bowtie 2 and Tophat 2.0.1 software [17-19].

To annotate gene expression, reads per kilobases per million read values of each gene were calculated, and differentially expressed genes were extracted using this value. The formula for calculating these values was defined as: reads per kilobases per million read values = total exon reads / (mapped reads [millions] × exon length [kbp]). RNA-Seq generated from 7,256,241 to 368,134,260 reads that were aligned to the human reference GRCh37.p5/hg19, representing an average genome-coverage of 105x.

### **Hierarchical clustering, Gene Ontology (GO) and Kyoto Encyclopedia of Genes and Genomes (KEGG) pathway analysis.**

Hierarchical clustering was performed using MEV software (<http://mev.tm4.org/>, v4.7.0, TIGR) [20]. The matrix was presented graphically by colouring each expression result on the basis of measured colour range: lower limit '0.0' was coloured green, upper limit '369.5' was coloured red and midpoint value '37.5' was coloured black. Pearson correlation was used as distance metric and the complete linkage method was used.

To identify genes/proteins that are specifically dysregulated in CLM, we fixed the cutoff at 2-fold with a P value less than 0.05 with a FDR q-value < 0.05. Dysregulated genes/proteins were

subjected to GO analysis and KEGG pathway analysis by DAVID (<http://david.ncifcrf.gov>) and STRING (<https://string-db.org/>) online analysis software [21-23].

### **TCGA data acquisition and processing.**

We downloaded RNA-sequencing data from 379 CRC patients from TCGA portal (<https://cancergenome.nih.gov/>), 12 of which had liver metastasis at the time of diagnosis or during the five-year follow-up period, and 367 of which had CRC without metastasis to the liver. The mRNA expression levels were investigated in 379 CRC tissues and 32 PN tissues in TCGA datasets by Illumina HiSeq 2000 RNA Sequencing Version 2 analysis and normalized by the RSEM algorithm. Whole-exome sequencing mutation datasets were downloaded from TCGA data set to create a customized CRC mutation database. The clinical information recorded, including the patient's characteristics, tumor characteristics, and overall and progression-free survival was assessed.

### **Cell lines and transfection**

Human CRC cell line SW480 were purchased from the Cell Bank of the Chinese Academy of Sciences (Shanghai, China) and cultured in DMEM media (Invitrogen, Carlsbad, USA) and supplemented with 10 % (v/v) fetal bovine serum, 100 U/ml penicillin, and 100 mg/ml streptomycin. SW480 cell lines were routinely tested for mycoplasma contamination, and have been authenticated with short-tandem repeat analysis. Cell culture was conducted at 37 °C in a humidified 5% CO<sub>2</sub> incubator.

*FDFT1* shRNA sequences were cloned into the plvx-shRNA plasmid. The non-silencing lentiviral shRNA vector was used as a control. The lentivirus was packaged using psPAX2 and pMD2G, a three-plasmid system. To obtain stable cell lines, lentivirus supernatant was added to SW480 cells, followed by screening with 1 µg/ml puromycin for 2 weeks. For UQCR5 over-expression, the human full length *UQCR5* cDNA was cloned into the pMSCV-hygro vector. The SW480 cells with stable over-expression of UQCR5 were polyclonal derivatives with

hygromycin selection to avoid clonal variations in functional assays.

### **Scratch-Wound Assay**

The human CRC SW480 cells were conducted at 37 °C in a humidified 5% CO<sub>2</sub> incubator and cells were grown into confluency in 6-well plates. The monolayer was artificially injured by scratching across the plate with a 200 µl pipette tip. The wells were washed 3 times to remove detached cells or cell debris. After 12 hours, digital images were captured using a camera-equipped, inverted microscope (Carl Zeiss, Inc., Thorwood, NY, USA) and wound width measurements were subtracted from wound width at time zero to obtain the net wound closure.

### ***In vitro* invasion assays**

Corning Costar Transwell 24-well plates with 8-µm-pore-size polycarbonate membrane filters (Costar, Cambridge, MA) coated with BD Matrigel matrix (Becton Dickinson, Bedford, MA) were maintained for 1 h at 37 °C, followed by the addition of  $1 \times 10^5$  transfected cells suspended in 200 µl medium with 1% serum into the top of each well insert [24-26]. Normal growth medium was added to the bottom wells. The cells were allowed to migrate for 24 h at 37 °C. The migrated cells were fixed with 10% methanol for 15 min. The invading cells on the lower surface of the membrane were stained with 0.5% crystal violet for 5 min at room temperature. Random fields were photographed and the stained cells were counted under a microscope (Nikon Corporation).

### **Statistical analysis.**

Data were expressed as means  $\pm$  standard deviations. Categorical data were reported as numbers and percentages. F tests were used to assess the equality of variances for comparable groups. Paired t test, One-way analysis of variance (ANOVA), Kruskal-Wallis test, and  $\chi^2$  tests were used to analyze mRNA expression. For time-to-event analyses, survival estimates were calculated by the Kaplan-Meier analysis, and groups were compared with the log-rank test. Clinical variables that were considered for single variable analyses were previously identified as confounding variables with impact on the prognosis of patients with colorectal cancer. The

Spearman's correlation coefficient was used to test the relationship of two independent groups. To identify genes/proteins that are specifically dysregulated in CLM, we fixed the cutoff at 2-fold with a P value less than 0.05 with a FDR q-value < 0.05. All calculations were performed with SPSS 20.0 software (SPSS Inc, Chicago, IL, USA).

### Supplementary References

1. Ma Y.S., Wu Z.J., Bai R.Z., Dong H., Xie B.X., Wu X.H., Hang X.S., Liu A.N., Jiang X.H., Wang G.R., Jiang J.J., Xu W.H., Chen X.P., Tan G.H., Fu D., Liu J.B., Liu Q. DRR1 promotes glioblastoma cell invasion and epithelial-mesenchymal transition via regulating AKT activation. *Cancer Lett.* 2018;423:86-94.
2. Xie R.T., Cong X.L., Zhong X.M., Luo P., Yang H.Q., Lu G.X., Luo P., Chang Z.Y., Sun R., Wu T.M., Lv Z.W., Fu D., Ma Y.S. MicroRNA-33a downregulation is associated with tumorigenesis and poor prognosis in patients with hepatocellular carcinoma. *Oncol. Lett.* 2018;154571-4577.
3. Neilson K.A., Ali N.A., Muralidharan S., Mirzaei M., Mariani M., Assadourian G., Lee A., van Sluyter S.C., Haynes P.A. Less label, more free: approaches in label-free quantitative mass spectrometry. *Proteomics.* 2011;11:535-553.
4. Bouckaert R.R., Drummond A.J. bModelTest: Bayesian phylogenetic site model averaging and model comparison. *BMC Evol. Biol.* 2017;17:42.
5. Polisetty R.V., Gautam P., Sharma R., Harsha H.C., Nair S.C., Gupta M.K., Uppin M.S., Challa S., Puligopu A.K., Ankathi P., Purohit A.K., Chandak G.R., Pandey A., Sirdeshmukh R. LC-MS/MS analysis of differentially expressed glioblastoma membrane proteome reveals altered calcium signaling and other protein groups of regulatory functions. *Mol. Cell. Proteomics.* 2012;11: M111.013565.



6. Lubber C.A., Cox J., Lauterbach H., Fancke B., Selbach M., Tschopp J., Akira S., Wiegand M., Hochrein H., O'Keeffe M., Mann M. Quantitative proteomics reveals subset-specific viral recognition in dendritic cells. *Immunity*. 2010;32: 279-289.
7. Ma Y.S., Huang T., Zhong X.M., Zhang H.W., Cong X.L., Xu H., Lu G.X., Yu F., Xue S.B., Lv Z.W., Fu D. Proteogenomic characterization and comprehensive integrative genomic analysis of human colorectal cancer liver metastasis. *Mol. Cancer*. 2018;17:139.
8. Imperial R., Ahmed Z., Toor O.M., Erdoğan C., Khaliq A., Case P., Case J., Kennedy K., Cummings L.S., Melton N., Raza S., Diri B., Mohammad R., El-Rayes B., Pluard T., Hussain A., Subramanian J., Masood A. Comparative proteogenomic analysis of right-sided colon cancer, left-sided colon cancer and rectal cancer reveals distinct mutational profiles. *Mol. Cancer*. 2018;17:177.
9. Lim S.Y., Lee J.H., Diefenbach R.J., Kefford R.F., Rizos H. Liquid biomarkers in melanoma: detection and discovery. *Mol. Cancer*. 2018;17:8.
10. Monteleone F., Taverna S., Alessandro R., Fontana S. SWATH-MS based quantitative proteomics analysis reveals that curcumin alters the metabolic enzyme profile of CML cells by affecting the activity of miR-22/IPO7/HIF-1 $\alpha$  axis. *J. Exp. Clin. Cancer Res*. 2018;37:170.
11. Antoury L., Hu N., Balaj L., Das S., Georghiou S., Darras B., Clark T., Breakefield X.O., Wheeler T.M. Analysis of extracellular mRNA in human urine reveals splice variant biomarkers of muscular dystrophies. *Nat. Commun*. 2018;9:3906.
12. Wu S., Ou T., Xing N., Lu J., Wan S., Wang C., Zhang X., Yang F., Huang Y., Cai Z. Whole-genome sequencing identifies ADGRG6 enhancer mutations and FRS2 duplications as angiogenesis-related drivers in bladder cancer. *Nat. Commun*. 2019;10:720.
13. Downes N.L., Laham-Karam N., Kaikkonen M.U., Ylä-Herttuala S. Differential but complementary HIF1 $\alpha$  and HIF2 $\alpha$  transcriptional regulation. *Mol. Ther*. 2018;26:1735-1745.

14. Chen H., Pan H., Qian Y., Zhou W., Liu X. MiR-25-3p promotes the proliferation of triple negative breast cancer by targeting BTG2. *Mol. Cancer*. 2018;17:4.
15. Xing F., Wang S., Zhou J. The expression of MicroRNA-598 inhibits ovarian cancer cell proliferation and metastasis by targeting URI. *Mol. Ther. Oncolytics*. 2019;12:9-15.
16. Li J., Song P., Jiang T., Dai D., Wang H., Sun J., Zhu L., Xu W., Feng L., Shin V.Y., Morrison H., Wang X., Jin H. Heat shock factor 1 epigenetically stimulates glutaminase-1-dependent mTOR activation to promote colorectal carcinogenesis. *Mol. Ther.* 2018;26:1828-1839.
17. Liu J.J., Zhang X., Wu X.H. miR-93 promotes the growth and invasion of prostate cancer by upregulating its target genes TGFBR2, ITGB8, and LATS2. *Mol. Ther. Oncolytics*. 2018;11:14-19.
18. Wang Q., Ju X., Wang J., Fan Y., Ren M., Zhang H. Immunogenic cell death in anticancer chemotherapy and its impact on clinical studies. *Cancer Lett.* 2018;438:17-23,
19. Ma Y.S., Lv Z.W., Yu F., Chang Z.Y., Cong X.L., Zhong X.M., Lu G.X., Zhu J., Fu D. MiRNA-302a/d inhibits the self-renewal capability and cell cycle entry of liver cancer stem cells by targeting the E2F7/AKT axis. *J. Exp. Clin. Cancer Res.* 2018;37(1):252.
20. Yang H., Li Y., Zhong X., Luo P., Luo P., Sun R., Xie R., Fu D., Ma Y., Cong X., Li W. Upregulation of microRNA-32 is associated with tumorigenesis and poor prognosis in patients with hepatocellular carcinoma. *Oncol. Lett.* 2018;15:4097-4104.
21. Lu H.M., Yi W.W., Ma Y.S., Wu W., Yu F., Fan H.W., Lv Z.W., Yang H.Q., Chang Z.Y., Zhang C., Xie W.T., Jiang J.J., Song Y.C., Chai L., Jia C.Y., Lu G.X., Zhong X.J., Hou L.K., Wu C.Y., Shi M.X., Liu J.B, Fu D. Prognostic implications of decreased microRNA-101-3p expression in patients with non-small cell lung cancer. *Oncol. Lett.* 2018;16:7048-7056.
22. Long H.D., Ma Y.S., Yang H.Q., Xue S.B., Liu J.B., Yu F., Lv Z.W., Li J.Y., Xie R.T., Chang Z.Y., Lu G.X., Xie W.T., Fu D., Pang L.J. Reduced hsa-miR-124-3p levels are associated with

the poor survival of patients with hepatocellular carcinoma. *Mol. Biol. Rep.*

2018;45:2615-2623.

23. Chen F., Long Q., Fu D., Zhu D., Ji Y., Han L., Zhang B., Xu Q., Liu B., Li Y., Wu S., Yang C.,

Qian M., Xu J., Liu S., Cao L., Chin Y.E., Lam E.W., Copp éJ.P., Sun Y. Targeting SPINK1 in

the damaged tumour microenvironment alleviates therapeutic resistance. *Nat. Commun.*

2018;9:4315.

24. Wang Z.Y., Hu M., Dai M.H., Xiong J., Zhang S., Wu H.J., Zhang S.S., Gong Z.J.

Upregulation of the long non-coding RNA AFAP1-AS1 affects the proliferation, invasion and

survival of tongue squamous cell carcinoma via the Wnt/ $\beta$ -catenin signaling pathway. *Mol.*

*Cancer.* 2018;17:3.

25. Sun M., Nie F.Q., Zang C., Wang Y., Hou J., Wei C., Li W., He X., Lu K.H. The Pseudogene

DUXAP8 promotes non-small-cell lung cancer cell proliferation and invasion by

epigenetically silencing EGR1 and RHOB. *Mol. Ther.* 2017;25:739-751.

26. Bialk P., Wang Y., Banas K., Kmiec E.B. Functional gene knockout of NRF2 increases

chemosensitivity of human lung cancer A549 cells in vitro and in a xenograft mouse model.

*Mol. Ther. Oncolytics.* 2018;11:75-89.
